# Supplementary material for: TORC1 Signaling Controls the Stability and Function of α-Arrestins Aly1 and Aly2
Source: Biomolecules. 2022 Mar 31;12(4):533. doi: 10.3390/biom12040533 (PMC9031309; doi:10.3390/biom12040533)
Supplement: Supplementary file 1 [file biomolecules-12-00533-s001.zip]

Archive with 4 entries (4 files):
- Supplemental KinDel manu_FIN.pdf
- Supplemental Table S3.xlsx
- Supplemental Table S4.xlsx
- Supplemental Table S5.xlsx
