# Supplementary material for: TORC1 Signaling Controls the Stability and Function of α-Arrestins Aly1 and Aly2
Source: Biomolecules. 2022 Mar 31;12(4):533. doi: 10.3390/biom12040533 (PMC9031309; doi:10.3390/biom12040533)
Supplement: Supplementary file 1 [file biomolecules-12-00533-s001.zip › Supplemental Table S3.xlsx]

## Sheet: Col Siz change - Ctrl Media
Control Media	Vector Data			Aly1 Data				Aly1:	Mean Size change	Std Dev		Aly2 Data				Aly2:	Mean Size change	Std Dev
Standard Name	Avg Colony Size	Std Dev		Avg Colony Size	Std Dev	Change from Vector		Vector Change Z Score	-79.6915	205.928		Avg Colony Size	Std Dev	Change from Vector		Vector Change Z Score	-68.922	160.775
PSK1	1010.67	56.7656		878.333	99.7112	-132.333	PSK1	-0.255633				1055.33	158.614	44.6667	PSK1	0.706508
KIN3	774.333	101.796		687	80.1686	-87.3333	KIN3	-0.0371094				748.667	136.005	-25.6667	KIN3	0.269043
KNS1	783	96.5039		658	58.66	-125	KNS1	-0.220022				711.667	60.7975	-71.3333	KNS1	-0.0149983
KIN2	690.333	24.1316		627.333	135.552	-63	KIN2	0.0810551				623.667	67.1739	-66.6667	KIN2	0.0140278
HOG1	716.667	163.084		805.333	99.6511	88.6667	HOG1	0.81756				706.333	51.4717	-10.3333	HOG1	0.364414
SKY1	927.333	73.0023		414.333	61.6468	-513	SKY1	-2.10418				845.333	50.6392	-82	SKY1	-0.0813437
YMR291W	881.667	155.359		1051	153.039	169.333	YMR291W	1.20928				834.667	81.0021	-47	YMR291W	0.136352
MCK1	321.333	138.655		444.667	231.986	123.333	MCK1	0.985904				828.333	71.9328	507	MCK1	3.58217
CLA4	447.667	105.836		796.333	103.016	348.667	CLA4	2.08014				837.333	47.3533	389.667	CLA4	2.85237
CKA2	1021	154.622		667	52.2015	-354	CKA2	-1.33206				671.667	95.9236	-349.333	CKA2	-1.74413
MEK1	918.667	202.401		870.333	93.5753	-48.3333	MEK1	0.152278				856	69.347	-62.6667	MEK1	0.0389073
PSK2	1192.67	332.062		1000.33	60.5172	-192.333	PSK2	-0.546997				1050	32.7414	-142.667	PSK2	-0.458683
YPL236C	937.667	78.1302		890.333	94.3257	-47.3333	YPL236C	0.157134				893.667	94.5163	-44	YPL236C	0.155012
TPK2	693	132.605		685	37.3229	-8	TPK2	0.348139				681.333	43.2936	-11.6667	TPK2	0.356121
YPL150W	727.333	90.1795		671.333	55.0848	-56	YPL150W	0.115048				686.333	28.0416	-41	YPL150W	0.173671
YPL141C	832.667	122.533		755.333	87.8313	-77.3333	YPL141C	0.0114514				689.333	43.8444	-143.333	YPL141C	-0.46283
MKK2	705.667	156.666		699	101.015	-6.66667	MKK2	0.354614				747	7.2111	41.3333	MKK2	0.685775
KIN1	932.667	126.295		891.667	200.44	-41	KIN1	0.187889				776	53.6749	-156.667	KIN1	-0.545761
SLT2	790	14.1774		779.333	165.567	-10.6667	SLT2	0.33519				225.333	19.6554	-564.667	SLT2	-3.08347
IRE1	861.333	105.311		886	158.899	24.6667	IRE1	0.506771				836.333	24.0069	-25	IRE1	0.27319
KSP1	892.333	105.765		290	30.348	-602.333	KSP1	-2.53799				750.667	63.6108	-141.667	KSP1	-0.452463
YCK1	845.667	78.5005		750.667	15.308	-95	YCK1	-0.0743393				744.667	27.7549	-101	YCK1	-0.199521
KCC4	876	73.7496		700.333	65.3095	-175.667	KCC4	-0.466063				775.333	80.0021	-100.667	KCC4	-0.197448
SAT4	906.667	140.593		780.333	19.5021	-126.333	SAT4	-0.226496				823.667	34.4867	-83	SAT4	-0.0875636
ELM1	906	51.0294		862.333	62.5007	-43.6667	ELM1	0.174939				998	40.9512	92	ELM1	1.00092
HSL1	660.667	71.2765		719	78.0449	58.3333	HSL1	0.670259				707.333	60.5007	46.6667	HSL1	0.718948
PRR1	425.667	83.4825		525.333	38.553	99.6667	PRR1	0.870977				725.333	32.3934	299.667	PRR1	2.29258
YPK1	728	90.1388		600.333	38.2797	-127.667	YPK1	-0.232971				605.667	48.8399	-122.333	YPK1	-0.332212
TPK3	637.667	52.5484		619.667	67.8258	-18	TPK3	0.299579				646.667	62.6445	9	TPK3	0.484665
KKQ8	725.667	123.306		741.333	206.887	15.6667	KKQ8	0.463066				719	79.8812	-6.66667	KKQ8	0.387221
YKL171W	717.667	56.8536		834.667	289.146	117	YKL171W	0.955149				700.333	28.746	-17.3333	YKL171W	0.320875
MKK1	874.333	54.151		1039.67	237.824	165.333	MKK1	1.18986				760	44.5421	-114.333	MKK1	-0.282453
KIN4	715.667	213.346		779.333	137.384	63.6667	KIN4	0.696158				684	65.643	-31.6667	KIN4	0.231724
SWE1	930.667	91.8386		843.667	64.6942	-87	SWE1	-0.0354907				763.333	111.195	-167.333	SWE1	-0.612107
TPK1	912.667	62.8039		785	31.7648	-127.667	TPK1	-0.232971				846	10.5357	-66.6667	TPK1	0.0140278
STE20	1800.33	291.057		1370	88.6623	-430.333	STE20	-1.70274				1497.67	53.4634	-302.667	STE20	-1.45386
RCK2	901.667	142.879		302.667	108.74	-599	RCK2	-2.5218				913.333	79.2233	11.6667	RCK2	0.501252
SSN3	563.333	38.8887		687	99.2018	123.667	SSN3	0.987522				454.333	9.60902	-109	SSN3	-0.24928
PHO85	517.667	82.7184		472.333	72.3418	-45.3333	PHO85	0.166846				562.667	50.3422	45	PHO85	0.708581
SKS1	705.333	22.4796		690	117	-15.3333	SKS1	0.312528				678	25.2389	-27.3333	SKS1	0.258676
ISR1	783	81.9024		776	144.876	-7	ISR1	0.352995				592	44.7996	-191	ISR1	-0.759311
DBF20	672.333	80.2517		1004.67	390.263	332.333	DBF20	2.00082				743	7.93725	70.6667	DBF20	0.868225
KIN82	667.667	95.5528		193.667	150.736	-474	KIN82	-1.91479				785.333	31.0215	117.667	KIN82	1.16056
FUS3	731.333	198.699		312.333	41.6453	-419	FUS3	-1.64771				720.333	106.308	-11	FUS3	0.360268
TEL1	872.667	54.8574		367.333	284.981	-505.333	TEL1	-2.06695				696.667	32.3161	-176	TEL1	-0.666012
YGL059W	928.333	112.736		857.667	144.362	-70.6667	YGL059W	0.0438252				698	35	-230.333	YGL059W	-1.00396
NPR1	880.667	39.5137		900.667	91.309	20	NPR1	0.484109				814.333	40.3774	-66.3333	NPR1	0.0161011
YCK2	1090	223.779		919.667	67.3003	-170.333	YCK2	-0.440164				930.667	30.7463	-159.333	YCK2	-0.562348
PTK1	845.667	49.3694		880	49.5076	34.3333	PTK1	0.553713				943	40.5956	97.3333	PTK1	1.03409
VHS1	703.667	53.4634		279	11.5326	-424.667	VHS1	-1.67523				744	48.6621	40.3333	VHS1	0.679555
GCN2	692.667	86.0252		688.333	128.633	-4.33333	GCN2	0.365945				348.667	29.2632	-344	GCN2	-1.71095
CKA1	694.667	64.3765		759	117.171	64.3333	CKA1	0.699395				765.333	42.1584	70.6667	CKA1	0.868225
CMK1	704	92.1466		712	135.724	8	CMK1	0.425836				711.333	56.7215	7.33333	CMK1	0.474299
PKH2	883.667	130.216		1018.33	281.234	134.667	PKH2	1.04094				740	35.3412	-143.667	PKH2	-0.464903
SKM1	497	303.145		341.667	166.656	-155.333	SKM1	-0.367322				555.667	19.0875	58.6667	SKM1	0.793586
YGK3	790.667	69.9452		890.333	171.103	99.6667	YGK3	0.870977				710	15	-80.6667	YGK3	-0.0730505
CMK2	866.333	48.9524		917.667	185.813	51.3333	CMK2	0.636266				697	58.0431	-169.333	CMK2	-0.624547
CTK3	223	10.3923		289.333	26.5581	66.3333	CTK3	0.709107				690.667	33.8575	467.667	CTK3	3.33752
SMK1	1031.67	178.029		702	72.519	-329.667	SMK1	-1.2139				658.333	64.8254	-373.333	SMK1	-1.8934
IME2	919.667	54.5008		722	58.9491	-197.667	IME2	-0.572896				791.667	65.0718	-128	IME2	-0.367458
BCK1	887.333	65.8964		749.667	19.5533	-137.667	BCK1	-0.281532				935.333	94.1559	48	BCK1	0.727241
BUB1	488	65		676.667	43.501	188.667	BUB1	1.30317				385	56.107	-103	BUB1	-0.211961
PRR2	730	52.0481		218.333	164.871	-511.667	PRR2	-2.0977				713.333	62.963	-16.6667	PRR2	0.325022
CHK1	774	42.7551		766	82.9277	-8	CHK1	0.348139				467.333	13.6137	-306.667	CHK1	-1.47874
CTK2	628	46.8722		755.333	187.591	127.333	CTK2	1.00533				658.333	30.5341	30.3333	CTK2	0.617356
PTK2	754.667	76.5528		679.333	25.4231	-75.3333	PTK2	0.0211635				674.667	37.2335	-80	PTK2	-0.0689039
DUN1	699	38.5746		317	36.0139	-382	DUN1	-1.46803				724.667	80.0396	25.6667	DUN1	0.58833
STE7	1476.67	204.138		1181.33	289.759	-295.333	STE7	-1.04717				1214	80.7279	-262.667	STE7	-1.20507
YBR028C	880.333	94.2408		1343.33	125.321	463	YBR028C	2.63535				749.333	29.6704	-131	YBR028C	-0.386118
AKL1	843	177.845		790.667	91.7406	-52.3333	AKL1	0.132853				708.333	41.5251	-134.667	AKL1	-0.408924
ARK1	1011	167.311		804.667	63.7913	-206.333	ARK1	-0.614982				724	35.3836	-287	ARK1	-1.35642
SSK2	1224.33	116.629		1056.67	47.0354	-167.667	SSK2	-0.427214				1017.33	9.45163	-207	SSK2	-0.858829
YNR047W	969.333	112.367		921.333	30.2875	-48	YNR047W	0.153896				923.667	38.8887	-45.6667	YNR047W	0.144645
KSS1	693	21		741.667	72.1757	48.6667	KSS1	0.623317				722	69.347	29	KSS1	0.609063
DBF2	619	139.438		696.667	83.3447	77.6667	DBF2	0.764143				687.333	109.024	68.3333	DBF2	0.853712
YAK1	795	52.7162		771.333	42.6654	-23.6667	YAK1	0.272061				745.333	77.242	-49.6667	YAK1	0.119766
HAL5	704.667	41.501		255	64.7843	-449.667	HAL5	-1.79663				592.333	36.0879	-112.333	HAL5	-0.270013
CTK1	613.667	77.7967		839.333	50.6195	225.667	CTK1	1.48284				750	59.3043	136.333	CTK1	1.27666
SSK22	759	145.434		905.333	252.937	146.333	SSK22	1.09759				716.333	22.0303	-42.6667	SSK22	0.163305
RIM11	732	53.2541		827.667	198.056	95.6667	RIM11	0.851552				649	27.5136	-83	RIM11	-0.0875636
HRK1	899	138.597		975.667	204.989	76.6667	HRK1	0.759287				769	19.0788	-130	HRK1	-0.379898
PBS2	1028	37.3631		935	126.574	-93	PBS2	-0.0646271				802	18.0278	-226	PBS2	-0.977007
MLP1	1113	40.2616		857.333	22.1209	-255.667	MLP1	-0.854549				818	11.5326	-295	MLP1	-1.40618
YPK2	1369.33	245.667		996.667	82.0508	-372.667	YPK2	-1.42271				1009.67	38.8115	-359.667	YPK2	-1.8084
YDL025C	996.333	74.8888		881.667	160.628	-114.667	YDL025C	-0.169842				982.333	36.1156	-14	YDL025C	0.341608
MRK1	894	142.454		797	72.753	-97	MRK1	-0.0840514				759	35.7911	-135	MRK1	-0.410997
PKH3	906.333	74.1103		794.667	60.1443	-111.667	PKH3	-0.155274				853	10.5357	-53.3333	PKH3	0.0969596
PKH1	841.333	22.5019		820	47.6235	-21.3333	PKH1	0.283392				760	24.8797	-81.3333	PKH1	-0.0771971
GIN4	975	155.019		903.667	7.37111	-71.3333	GIN4	0.0405878				952.667	50.1431	-22.3333	GIN4	0.289776
SPS1	872	64.3739		952	167.215	80	SPS1	0.775474				844.667	41.0163	-27.3333	SPS1	0.258676
RCK1	994.333	114.037		849	21	-145.333	RCK1	-0.318762				858.667	53.4634	-135.667	RCK1	-0.415144
TOS3	940.333	29.1433		921	197.385	-19.3333	TOS3	0.293104				800	28	-140.333	TOS3	-0.44417
ATG1	1051	111.946		701	260.161	-350	ATG1	-1.31264				885.333	2.51661	-165.667	ATG1	-0.60174
YCK3	1161	87.6413		954.667	107.677	-206.333	YCK3	-0.614982	Mean Size change	Std Dev		884	92.6769	-277	YCK3	-1.29422	Mean Size change	Std Dev
									-153.301	176.321							-503.85	206.857
STE11	1758.67	187.777		1492.33	200.276	-266.333	STE11	-0.641059				817	935.276	-941.667	STE11	-2.11652
RIM15	785	80.8888		789.667	246.926	4.66667	RIM15	0.895909				373.667	409.244	-411.333	RIM15	0.447249
VPS15	512.333	6.65833		493.333	102.026	-19	VPS15	0.761685				215.667	328.636	-296.667	VPS15	1.00158
BUD32	445	144.938		378	99.0152	-67	BUD32	0.489454				148.333	207.039	-296.667	BUD32	1.00158
GIP4	997	126.475		793.333	242.385	-203.667	GIP4	-0.285647				562.667	341.137	-434.333	GIP4	0.336061
SPO7	960	191.251		649	159.038	-311	SPO7	-0.894385				340.667	157.513	-619.333	SPO7	-0.558278
PSR1	978	207.704		854.667	27.3008	-123.333	PSR1	0.169961				482	405.852	-496	PSR1	0.0379481
PSR2	870	111.745		337	25.1197	-533	PSR2	-2.15345				434.333	380.153	-435.667	PSR2	0.329615
CMP2	809.333	98.3379		865.333	83.5783	56	CMP2	1.18704				427	412.666	-382.333	CMP2	0.587443
PPZ1	830.667	18.8237		699.333	110.387	-131.333	PPZ1	0.124589				450	308.409	-380.667	PPZ1	0.5955
MIH1	870	130.931		667.333	101.199	-202.667	MIH1	-0.279975				486.333	385.098	-383.667	MIH1	0.580997
ZDS1	1150.67	110.247		1026.33	221.633	-124.333	ZDS1	0.16429				550.333	519.346	-600.333	ZDS1	-0.466427
RTS1	992.333	93.3077		800	344.077	-192.333	RTS1	-0.22137				281	119.787	-711.333	RTS1	-1.00303
PTC5	693	50.4083		625.333	49.9032	-67.6667	PTC5	0.485673				442.667	346.116	-250.333	PTC5	1.22557
PPQ1	737	83.5225		753.333	59.4671	16.3333	PPQ1	0.962076				434.333	421.099	-302.667	PPQ1	0.972572
RRD2	805.667	30.1386		787	121.371	-18.6667	RRD2	0.763575				589.333	177.015	-216.333	RRD2	1.38993
PPH3	857.333	145.717		919.667	38.0044	62.3333	PPH3	1.22296				497	244.227	-360.333	PPH3	0.693796
PPM1	809.333	109.235		421.667	190.5	-387.667	PPM1	-1.3292				534.333	244.361	-275	PPM1	1.10632
PPZ2	891	132.14		786	179.307	-105	PPZ2	0.273938				451	308	-440	PPZ2	0.308667
GIP2	891.667	230.99		475.667	63.3745	-416	GIP2	-1.48989				227.667	172.46	-664	GIP2	-0.774208
PTP3	855.333	21.3854		781.333	120.79	-74	PTP3	0.449754				436.667	318.073	-418.667	PTP3	0.411798
PPT1	887.667	88.2175		844	140.808	-43.6667	PPT1	0.621788				465.333	257.685	-422.333	PPT1	0.394072
RTS3	847.667	87.0077		734.333	34.0196	-113.333	RTS3	0.226676				311.333	388.62	-536.333	RTS3	-0.157034
PTC7	958	24.5153		868	124.648	-90	PTC7	0.35901				486.667	410.264	-471.333	PTC7	0.157193
CNB1	967	28.1603		869.333	201.505	-97.6667	CNB1	0.315529				510	437.489	-457	CNB1	0.226484
GAC1	792.667	80.0521		342.667	46.3609	-450	GAC1	-1.68272				415.667	296.928	-377	GAC1	0.613225
PTP2	715	169.847		850.667	78.4177	135.667	PTP2	1.63887				416.333	181.693	-298.667	PTP2	0.991909
PIG1	733.333	16.8622		554.667	106.251	-178.667	PIG1	-0.14386				446	272.703	-287.333	PIG1	1.0467
SAP4	982.333	405.266		674.667	163.98	-307.667	SAP4	-0.87548				360	217.945	-622.333	SAP4	-0.57278
SAP155	904.667	402.647		737.333	100.221	-167.333	SAP155	-0.0795835				410.667	285.239	-494	SAP155	0.0476166
PSY4	601.333	290.519		424.333	62.4286	-177	PSY4	-0.134408				227.333	191.448	-374	PSY4	0.627728
PTC3	769.333	47.2582		756.333	31.0698	-13	PTC3	0.795713				483	292.573	-286.333	PTC3	1.05153
BNI4	802	63.498		866	122.98	64	BNI4	1.23242				325.333	278.355	-476.667	BNI4	0.13141
PSY2	804.333	115.418		672.667	79.7517	-131.667	PSY2	0.122699				456	239.042	-348.333	PSY2	0.751808
PAM1	769.333	121.459		792	120.05	22.6667	PAM1	0.997996				442	351.979	-327.333	PAM1	0.853327
PIG2	1048	86.238		1009.33	91.2707	-38.6667	PIG2	0.650146				499.667	394.338	-548.333	PIG2	-0.215045
YVH1	566.333	88.9625		601.667	210.742	35.3333	YVH1	1.06983				314.333	199.229	-252	YVH1	1.21751
SIS2	774.667	152.7		657	152.292	-117.667	SIS2	0.202099				326.667	431.723	-448	SIS2	0.269993
GLC8	813.667	57.8302		715.667	114.352	-98	GLC8	0.313638				478.667	194.021	-335	GLC8	0.816264
ZDS2	770.333	77.5263		669	119.147	-101.333	ZDS2	0.294733				458.667	370.677	-311.667	ZDS2	0.929064
TIP41	990	487.443		621.667	88.4553	-368.333	TIP41	-1.21955				562.667	98.0221	-427.333	TIP41	0.369901
LTP1	1073.67	450.814		682.667	144.832	-391	LTP1	-1.3481				397.333	281.898	-676.333	LTP1	-0.833831
SAP185	1027	160.072		760.667	10.0167	-266.333	SAP185	-0.641059				517	344.301	-510	SAP185	-0.0297316
YMR1	829.333	59.2481		619.333	71.5914	-210	YMR1	-0.321566				423.667	281.529	-405.667	YMR1	0.474643
NEM1	909.667	260.128		282	156.751	-627.667	NEM1	-2.69035				248	410.643	-661.667	NEM1	-0.762928
CNA1	790.333	44.0719		264	108.78	-526.333	CNA1	-2.11564				397	286.859	-393.333	CNA1	0.534266
PTP1	791.333	32.2542		729	51.5073	-62.3333	PTP1	0.515921				446.333	273.652	-345	PTP1	0.767922
PHO13	964.667	111.541		901.667	124.005	-63	PHO13	0.51214				463.333	402.731	-501.333	PHO13	0.0121653
REG1	1021	143.091		945.667	193.583	-75.3333	REG1	0.442192				352	522.656	-669	REG1	-0.798379
PTC6	683.333	176.953		692.333	69.515	9	PTC6	0.920486				235	342.519	-448.333	PTC6	0.268381
PPH21	743.667	109.801		731.333	102.846	-12.3333	PPH21	0.799494				391.333	246.774	-352.333	PPH21	0.732471
PPH22	810.333	133.152		777.667	31.9427	-32.6667	PPH22	0.684174				429.667	88.036	-380.667	PPH22	0.5955
GIP1	1018.33	332.545		750	118.368	-268.333	GIP1	-0.652402				543.333	205.505	-475	GIP1	0.139468
REG2	952.667	315.081		780.333	60.6658	-172.333	REG2	-0.107941				411	270.466	-541.667	REG2	-0.182817
YBR051W	840.667	117.5		634.667	138.001	-206	YBR051W	-0.29888				342.667	377.884	-498	YBR051W	0.0282796
SIW14	856.667	77.7967		693.667	104.026	-163	SIW14	-0.0550072				403	305.923	-453.667	SIW14	0.242599
PPG1	924	301		786	126.929	-138	PPG1	0.0867796				339	324.51	-585	PPG1	-0.392301
TEP1	887.667	178.733		844	117.554	-43.6667	TEP1	0.621788				481	359.251	-406.667	TEP1	0.469809
SDP1	797.667	27.6827		713.333	73.6365	-84.3333	SDP1	0.391148				425.667	211.481	-372	SDP1	0.637397
RRD1	1067.67	127.052		777.333	169.877	-290.333	RRD1	-0.777174				640.667	237.711	-427	RRD1	0.371512
OCA1	1000	71.8401		1076	206.216	76	OCA1	1.30047				541.667	501.766	-458.333	OCA1	0.220039
SAP190	815.667	79.5005		384	24.0208	-431.667	SAP190	-1.57874				515.667	214.514	-300	SAP190	0.985464
PTC4	759	92.7739		257.667	67.471	-501.333	PTC4	-1.97385				417	255.74	-342	PTC4	0.782425
PPS1	729.667	44.0606		703.333	52.7289	-26.3333	PPS1	0.720094				442	399.736	-287.667	PPS1	1.04509
DCR2	930.667	281.002		667	193.629	-263.667	DCR2	-0.625935				451	148.395	-479.667	DCR2	0.116908
GIP3	890.333	198.309		640	81.074	-250.333	GIP3	-0.550316				418	278.781	-472.333	GIP3	0.152359
YSW1	1132.33	462.984		769.667	79.9771	-362.667	YSW1	-1.18741				370.667	258.353	-761.667	YSW1	-1.24635
PTC1	566.333	76.0548		340.667	29.2632	-225.667	PTC1	-0.410419				179	181.364	-387.333	PTC1	0.563271
PHO8	905.667	108.933		755.333	101.962	-150.333	PHO8	0.0168315				373.667	262.119	-532	PHO8	-0.136085
YER134C	746.667	39.9541		613	47.1275	-133.667	YER134C	0.111356				276	330.822	-470.667	YER134C	0.160416
SIT4	573.667	35.7957		1207.67	75.0555	634	SIT4	4.46515				492.333	125.516	-81.3333	SIT4	2.04256
PTC2	973.333	76.1599		908	50.0899	-65.3333	PTC2	0.498906				372	414.492	-601.333	PTC2	-0.471261
MSG5	926.667	124.275		534	33.6452	-392.667	MSG5	-1.35755				559	419.347	-367.667	MSG5	0.658345
TPD3	462.333	25.3246		330.667	72.3418	-131.667	TPD3	0.122699				304.333	91.6206	-158	TPD3	1.67193
ALK1	1178	213.422		1193	128.02	15	ALK1	0.954515				597.333	384.23	-580.667	ALK1	-0.371353
ALK2	1367	204.712		1239.33	81.5618	-127.667	ALK2	0.145385				531.333	473.511	-835.667	ALK2	-1.60409
CKB1	1141.33	123.622		959.667	139.378	-181.667	CKB1	-0.160875				411	535.835	-730.333	CKB1	-1.09488
CKB2	1119.67	225.649		877.667	22.5906	-242	CKB2	-0.503053				381.333	431.155	-738.333	CKB2	-1.13355
CLG1	1570.67	316.734		1213.33	129.454	-357.333	CLG1	-1.15716				586.333	601.237	-984.333	CLG1	-2.32278
FMP48	1725.33	416.565		1385.33	97.7463	-340	FMP48	-1.05886				614	628.436	-1111.33	FMP48	-2.93673
GAL83	1617	265.656		1363	117.171	-254	GAL83	-0.571111				612.667	597.872	-1004.33	GAL83	-2.41947
IKS1	1185	68.942		1139.33	124.709	-45.6667	IKS1	0.610445				679.333	394.619	-505.667	IKS1	-0.00878313
KDX1	1344.67	56.2257		1235	93.1826	-109.667	KDX1	0.247471				685.333	582.23	-659.333	KDX1	-0.751648
PKP1	1804.67	177.894		1581.67	135.123	-223	PKP1	-0.395295				795	811.751	-1009.67	PKP1	-2.44525
PRK1	1316	215.527		1499	118.672	183	PRK1	1.90732				604.667	554.722	-711.333	PRK1	-1.00303
RTR1	1264.67	208.169		1231	130.817	-33.6667	RTR1	0.678503				576.667	574.269	-688	RTR1	-0.89023
SAK1	1311.67	187.228		1085.33	78.5642	-226.333	SAK1	-0.4142				550.333	512.898	-761.333	SAK1	-1.24474
SIP1	1315	222.731		1231.33	102.041	-83.6667	SIP1	0.394929				547	508.754	-768	SIP1	-1.27697
SIP2	1304	81.3572		1217.67	100.808	-86.3333	SIP2	0.379806				541	533.823	-763	SIP2	-1.2528
SNF4	1293.67	252.294		1145	78.3135	-148.667	SNF4	0.0262839				614.333	476.376	-679.333	SNF4	-0.848333
YCH1	1772	412.737		1453.67	83.4286	-318.333	YCH1	-0.935976				673.667	675.407	-1098.33	YCH1	-2.87389
TOR1	1591	117.809		1342.33	73.3508	-248.667	TOR1	-0.540863				609	848.5	-982	TOR1	-2.3115
SNF1	1629.33	106.566		1390.33	125.831	-239	SNF1	-0.486039				653	633.681	-976.333	SNF1	-2.28411

## Sheet: Control Media - 426-Vector
	Transformed with: _426-Vector__			Colony Size	Mean Colony Size	Standard Deviation	Z Score					Colony Size	Mean Colony Size	Standard Deviation	Z Score				Transformed with: _426-Vector__			Colony Size	Mean Colony Size	Standard Deviation	Z Score					Colony Size	Mean Colony Size	Standard Deviation	Z Score			Transformed with: _426-Vector__			Colony Size	Mean Colony Size	Standard Deviation	Z Score							Colony Size
Replicate 1	Standard Name	KinDel PLATE #	location (KinDel)	ENTER DATA BELOW	799.33	202.54			Standard Name	KinDel PLATE #	location (KinDel)	ENTER DATA BELOW	881.14	257.246				Replicate 2	Standard Name	KinDel PLATE #	location (KinDel)	ENTER DATA BELOW	812.468	225.544			Standard Name	KinDel PLATE #	location (KinDel)	ENTER DATA BELOW	1098.28	384.272			Replicate 3	Standard Name	KinDel PLATE #	location (KinDel)	ENTER DATA BELOW	884.298	282.747					Standard Name	KinDel PLATE #	location (KinDel)	ENTER DATA BELOW
	PSK1	1	A1	1017			1.0747		STE11	2	A1	1673			3.07822				PSK1	1	A1	951			0.614213		STE11	2	A1	1974			2.27891			PSK1	1	A1	1064			0.635559				STE11	2	A1	1629
	KIN3	1	A2	666			-0.658288		RIM15	2	A2	839			-0.163811				KIN3	1	A2	789			-0.104051		RIM15	2	A2	692			-1.05727			KIN3	1	A2	868			-0.0576413				RIM15	2	A2	824
	KNS1	1	A3	782			-0.0855622		VPS15	2	A3	520			-1.40387				KNS1	1	A3	687			-0.556291		VPS15	2	A3	508			-1.5361			KNS1	1	A3	880			-0.0152004				VPS15	2	A3	509
	KIN2	1	A4	670			-0.638538		BUD32	2	A4	371			-1.98308				KIN2	1	A4	684			-0.569592		BUD32	2	A4	612			-1.26546			KIN2	1	A4	717			-0.591688				BUD32	2	A4	352
	HOG1	1	A5	797			-0.0115028		GIP4	2	A5	1031			0.582556				HOG1	1	A5	529			-1.25682		GIP4	2	A5	857			-0.627887			HOG1	1	A5	824			-0.213258				GIP4	2	A5	1103
	SKY1	1	A6	854			0.269923		SPO7	2	A6	887			0.0227806				SKY1	1	A6	928			0.512237		SPO7	2	A6	1177			0.204856			SKY1	1	A6	1000			0.409208				SPO7	2	A6	816
	YMR291W	1	A7	949			0.738965		PSR1	2	A7	823			-0.226008				YMR291W	1	A7	704			-0.480918		PSR1	2	A7	1214			0.301142			YMR291W	1	A7	992			0.380914				PSR1	2	A7	897
	MCK1	1	A8	446			-1.74449		PSR2	2	A8	937			0.217147				MCK1	1	A8	172			-2.83966		PSR2	2	A8	741			-0.929757			MCK1	1	A8	346			-1.90382				PSR2	2	A8	932
	CLA4	1	A9	463			-1.66056		CMP2	2	A9	897			0.0616538				CLA4	1	A9	545			-1.18588		CMP2	2	A9	703			-1.02864			CLA4	1	A9	335			-1.94272				CMP2	2	A9	828
	CKA2	1	A10	907			0.531599		PPZ1	2	A10	843			-0.148262				CKA2	1	A10	959			0.649683		PPZ1	2	A10	809			-0.752799			CKA2	1	A10	1197			1.10594				PPZ1	2	A10	840
	MEK1	1	A11	876			0.378543		MIH1	2	A11	1016			0.524246				MEK1	1	A11	741			-0.31687		MIH1	2	A11	763			-0.872506			MEK1	1	A11	1139			0.900814				MIH1	2	A11	831
	PSK2	1	A12	1150			1.73136		ZDS1	2	A12	1203			1.25118				PSK2	1	A12	884			0.317153		ZDS1	2	A12	1024			-0.193299			PSK2	1	A12	1544			2.33319				ZDS1	2	A12	1225
	YPL236C	1	B1	852			0.260048		RTS1	2	B1	942			0.236584				YPL236C	1	B1	1005			0.853634		RTS1	2	B1	1100			0.00447711			YPL236C	1	B1	956			0.253591				RTS1	2	B1	935
	TPK2	1	B2	653			-0.722472		PTC5	2	B2	682			-0.774121				TPK2	1	B2	585			-1.00853		PTC5	2	B2	748			-0.91154			TPK2	1	B2	841			-0.153133				PTC5	2	B2	649
	YPL150W	1	B3	657			-0.702723		PPQ1	2	B3	641			-0.933502				YPL150W	1	B3	829			0.073298		PPQ1	2	B3	793			-0.794436			YPL150W	1	B3	696			-0.66596				PPQ1	2	B3	777
	YPL141C	1	B4	725			-0.366988		RRD2	2	B4	774			-0.416487				YPL141C	1	B4	966			0.680719		RRD2	2	B4	809			-0.752799			YPL141C	1	B4	807			-0.273382				RRD2	2	B4	834
	MKK2	1	B5	804			0.0230582		PPH3	2	B5	754			-0.494234				MKK2	1	B5	525			-1.27456		PPH3	2	B5	1024			-0.193299			MKK2	1	B5	788			-0.34058				PPH3	2	B5	794
	KIN1	1	B6	834			0.171177		PPM1	2	B6	769			-0.435924				KIN1	1	B6	1075			1.16399		PPM1	2	B6	933			-0.430111			KIN1	1	B6	889			0.0166302				PPM1	2	B6	726
	SLT2	1	B7	779			-0.100374		PPZ2	2	B7	750			-0.509783				SLT2	1	B7	806			-0.0286777		PPZ2	2	B7	1012			-0.224527			SLT2	1	B7	785			-0.35119				PPZ2	2	B7	911
	IRE1	1	B8	836			0.181051		GIP2	2	B8	746			-0.525333				IRE1	1	B8	771			-0.183858		GIP2	2	B8	1158			0.155412			IRE1	1	B8	977			0.327863				GIP2	2	B8	771
	KSP1	1	B9	780			-0.0954367		PTP3	2	B9	832			-0.191022				KSP1	1	B9	990			0.787128		PTP3	2	B9	874			-0.583648			KSP1	1	B9	907			0.0802914				PTP3	2	B9	860
	YCK1	1	B10	866			0.32917		PPT1	2	B10	989			0.419288				YCK1	1	B10	759			-0.237063		PPT1	2	B10	828			-0.703355			YCK1	1	B10	912			0.0979751				PPT1	2	B10	846
	KCC4	1	B11	883			0.413104		RTS3	2	B11	802			-0.307642				KCC4	1	B11	799			-0.0597138		RTS3	2	B11	793			-0.794436			KCC4	1	B11	946			0.218224				RTS3	2	B11	948
	SAT4	1	B12	824			0.121804		PTC7	2	B12	982			0.392077				SAT4	1	B12	827			0.0644305		PTC7	2	B12	933			-0.430111			SAT4	1	B12	1069			0.653243				PTC7	2	B12	959
	ELM1	1	C1	854			0.269923		CNB1	2	C1	960			0.306555				ELM1	1	C1	908			0.423562		CNB1	2	C1	998			-0.26096			ELM1	1	C1	956			0.253591				CNB1	2	C1	943
	HSL1	1	C2	636			-0.806406		GAC1	2	C2	871			-0.0394167				HSL1	1	C2	605			-0.919857		GAC1	2	C2	796			-0.786629			HSL1	1	C2	741			-0.506807				GAC1	2	C2	711
	PRR1	1	C3	495			-1.50256		PTP2	2	C3	611			-1.05012				PRR1	1	C3	333			-2.12583		PTP2	2	C3	911			-0.487362			PRR1	1	C3	449			-1.53953				PTP2	2	C3	623
	YPK1	1	C4	703			-0.475608		PIG1	2	C4	714			-0.649727				YPK1	1	C4	828			0.0688643		PIG1	2	C4	745			-0.919347			YPK1	1	C4	653			-0.818039				PIG1	2	C4	741
	TPK3	1	C5	597			-0.99896		SAP4	2	C5	702			-0.696375				TPK3	1	C5	697			-0.511954		SAP4	2	C5	1447			0.907483			TPK3	1	C5	619			-0.938288				SAP4	2	C5	798
	KKQ8	1	C6	705			-0.465733		SAP155	2	C6	592			-1.12398				KKQ8	1	C6	614			-0.879953		SAP155	2	C6	1359			0.678479			KKQ8	1	C6	858			-0.0930086				SAP155	2	C6	763
	YKL171W	1	C7	729			-0.347238		PSY4	2	C7	414			-1.81593				YKL171W	1	C7	656			-0.693737		PSY4	2	C7	936			-0.422304			YKL171W	1	C7	768			-0.411315				PSY4	2	C7	454
	MKK1	1	C8	879			0.393355		PTC3	2	C8	716			-0.641952				MKK1	1	C8	818			0.024527		PTC3	2	C8	786			-0.812652			MKK1	1	C8	926			0.147489				PTC3	2	C8	806
	KIN4	1	C9	748			-0.25343		BNI4	2	C9	826			-0.214346				KIN4	1	C9	488			-1.4386		BNI4	2	C9	730			-0.958382			KIN4	1	C9	911			0.0944384				BNI4	2	C9	850
	SWE1	1	C10	828			0.141553		PSY2	2	C10	727			-0.599192				SWE1	1	C10	1005			0.853634		PSY2	2	C10	937			-0.419701			SWE1	1	C10	959			0.264202				PSY2	2	C10	749
	TPK1	1	C11	881			0.403229		PAM1	2	C11	809			-0.280431				TPK1	1	C11	872			0.263948		PAM1	2	C11	633			-1.21081			TPK1	1	C11	985			0.356157				PAM1	2	C11	866
	STE20	1	C12	1807			4.97516		PIG2	2	C12	956			0.291006				STE20	1	C12	1506			3.07493		PIG2	2	C12	1061			-0.0970135			STE20	1	C12	2088			4.25718				PIG2	2	C12	1127
	RCK2	1	D1	740			-0.292928		YVH1	2	D1	669			-0.824657				RCK2	1	D1	954			0.627514		YVH1	2	D1	518			-1.51007			RCK2	1	D1	1011			0.448112				YVH1	2	D1	512
	SSN3	1	D2	545			-1.2557		SIS2	2	D2	660			-0.859643				SSN3	1	D2	608			-0.906556		SIS2	2	D2	948			-0.391076			SSN3	1	D2	537			-1.2283				SIS2	2	D2	716
	PHO85	1	D3	534			-1.31001		GLC8	2	D3	797			-0.327079				PHO85	1	D3	591			-0.981929		GLC8	2	D3	878			-0.573239			PHO85	1	D3	428			-1.6138				GLC8	2	D3	766
	SKS1	1	D4	686			-0.559542		ZDS2	2	D4	705			-0.684713				SKS1	1	D4	730			-0.365641		ZDS2	2	D4	856			-0.63049			SKS1	1	D4	700			-0.651813				ZDS2	2	D4	750
	ISR1	1	D5	695			-0.515106		TIP41	2	D5	670			-0.820769				ISR1	1	D5	857			0.197442		TIP41	2	D5	1551			1.17812			ISR1	1	D5	797			-0.308749				TIP41	2	D5	749
	DBF20	1	D6	626			-0.855779		LTP1	2	D6	707			-0.676938				DBF20	1	D6	765			-0.210461		LTP1	2	D6	1577			1.24579			DBF20	1	D6	626			-0.913531				LTP1	2	D6	937
	KIN82	1	D7	754			-0.223806		SAP185	2	D7	958			0.298781				KIN82	1	D7	565			-1.09721		SAP185	2	D7	1210			0.290733			KIN82	1	D7	684			-0.708401				SAP185	2	D7	913
	FUS3	1	D8	852			0.260048		YMR1	2	D8	763			-0.459248				FUS3	1	D8	840			0.122069		YMR1	2	D8	848			-0.651308			FUS3	1	D8	502			-1.35209				YMR1	2	D8	877
	TEL1	1	D9	840			0.200801		NEM1	2	D9	719			-0.63029				TEL1	1	D9	936			0.547707		NEM1	2	D9	1206			0.280323			TEL1	1	D9	842			-0.149596				NEM1	2	D9	804
	YGL059W	1	D10	839			0.195863		CNA1	2	D10	740			-0.548656				YGL059W	1	D10	891			0.348189		CNA1	2	D10	809			-0.752799			YGL059W	1	D10	1055			0.603728				CNA1	2	D10	822
	NPR1	1	D11	888			0.43779		PTP1	2	D11	796			-0.330966				NPR1	1	D11	916			0.459032		PTP1	2	D11	821			-0.721571			NPR1	1	D11	838			-0.163743				PTP1	2	D11	757
	YCK2	1	D12	1009			1.0352		PHO13	2	D12	992			0.43095				YCK2	1	D12	918			0.4679		PHO13	2	D12	842			-0.666922			YCK2	1	D12	1343			1.62231				PHO13	2	D12	1060
	PTK1	1	E1	859			0.294609		REG1	2	E1	931			0.193823				PTK1	1	E1	791			-0.0951836		REG1	2	E1	1186			0.228277			PTK1	1	E1	887			0.00955671				REG1	2	E1	946
	VHS1	1	E2	642			-0.776782		PTC6	2	E2	537			-1.33778				VHS1	1	E2	737			-0.334605		PTC6	2	E2	880			-0.568034			VHS1	1	E2	732			-0.538637				PTC6	2	E2	633
	GCN2	1	E3	643			-0.771845		PPH21	2	E3	660			-0.859643				GCN2	1	E3	792			-0.0907499		PPH21	2	E3	868			-0.599262			GCN2	1	E3	643			-0.853407				PPH21	2	E3	703
	CKA1	1	E4	658			-0.697786		PPH22	2	E4	681			-0.778009				CKA1	1	E4	769			-0.192726		PPH22	2	E4	947			-0.393678			CKA1	1	E4	657			-0.803892				PPH22	2	E4	803
	CMK1	1	E5	643			-0.771845		GIP1	2	E5	734			-0.57198				CMK1	1	E5	659			-0.680436		GIP1	2	E5	1384			0.743537			CMK1	1	E5	810			-0.262772				GIP1	2	E5	937
	PKH2	1	E6	836			0.181051		REG2	2	E6	743			-0.536994				PKH2	1	E6	1031			0.968911		REG2	2	E6	1315			0.563976			PKH2	1	E6	784			-0.354727				REG2	2	E6	800
	SKM1	1	E7	729			-0.347238		YBR051W	2	E7	757			-0.482572				SKM1	1	E7	154			-2.91947		YBR051W	2	E7	975			-0.320813			SKM1	1	E7	608			-0.977192				YBR051W	2	E7	790
	YGK3	1	E8	807			0.03787		SIW14	2	E8	772			-0.424262				YGK3	1	E8	714			-0.436581		SIW14	2	E8	873			-0.58625			YGK3	1	E8	851			-0.117766				SIW14	2	E8	925
	CMK2	1	E9	814			0.0724311		PPG1	2	E9	709			-0.669164				CMK2	1	E9	874			0.272816		PPG1	2	E9	1268			0.441667			CMK2	1	E9	911			0.0944384				PPG1	2	E9	795
	CTK3	1	E10	211			-2.90475		TEP1	2	E10	869			-0.0471913				CTK3	1	E10	229			-2.58694		TEP1	2	E10	1075			-0.060581			CTK3	1	E10	229			-2.31762				TEP1	2	E10	719
	SMK1	1	E11	910			0.546411		SDP1	2	E11	794			-0.338741				SMK1	1	E11	949			0.605345		SDP1	2	E11	827			-0.705957			SMK1	1	E11	1236			1.24388				SDP1	2	E11	772
	IME2	1	E12	956			0.773526		RRD1	2	E12	921			0.15495				IME2	1	E12	946			0.592044		RRD1	2	E12	1138			0.103365			IME2	1	E12	857			-0.0965454				RRD1	2	E12	1144
	BCK1	1	F1	957			0.778463		OCA1	2	F1	1025			0.559232				BCK1	1	F1	826			0.0599968		OCA1	2	F1	1056			-0.110025			BCK1	1	F1	879			-0.0187372				OCA1	2	F1	919
	BUB1	1	F2	413			-1.90742		SAP190	2	F2	762			-0.463135				BUB1	1	F2	523			-1.28342		SAP190	2	F2	907			-0.497771			BUB1	1	F2	528			-1.26013				SAP190	2	F2	778
	PRR2	1	F3	673			-0.623727		PTC4	2	F3	682			-0.774121				PRR2	1	F3	775			-0.166123		PTC4	2	F3	862			-0.614876			PRR2	1	F3	742			-0.50327				PTC4	2	F3	733
	CHK1	1	F4	740			-0.292928		PPS1	2	F4	679			-0.785783				CHK1	1	F4	822			0.0422619		PPS1	2	F4	759			-0.882915			CHK1	1	F4	760			-0.439609				PPS1	2	F4	751
	CTK2	1	F5	645			-0.761971		DCR2	2	F5	731			-0.583642				CTK2	1	F5	575			-1.05287		DCR2	2	F5	1252			0.40003			CTK2	1	F5	664			-0.779135				DCR2	2	F5	809
	PTK2	1	F6	819			0.0971175		GIP3	2	F6	736			-0.564206				PTK2	1	F6	670			-0.631665		GIP3	2	F6	1114			0.0409096			PTK2	1	F6	775			-0.386558				GIP3	2	F6	821
	DUN1	1	F7	727			-0.357113		YSW1	2	F7	818			-0.245445				DUN1	1	F7	715			-0.432147		YSW1	2	F7	1664			1.47219			DUN1	1	F7	655			-0.810966				YSW1	2	F7	915
	STE7	1	F8	1277			2.3584		PTC1	2	F8	584			-1.15508				STE7	1	F8	1468			2.90645		PTC1	2	F8	632			-1.21341			STE7	1	F8	1685			2.83187				PTC1	2	F8	483
	YBR028C	1	F9	831			0.156365		PHO8	2	F9	860			-0.0821773				YBR028C	1	F9	821			0.0378282		PHO8	2	F9	1030			-0.177685			YBR028C	1	F9	989			0.370304				PHO8	2	F9	827
	AKL1	1	F10	730			-0.342301		YER134C	2	F10	759			-0.474797				AKL1	1	F10	751			-0.272533		YER134C	2	F10	779			-0.830868			AKL1	1	F10	1048			0.578971				YER134C	2	F10	702
	ARK1	1	F11	979			0.887084		SIT4	2	F11	553			-1.27559				ARK1	1	F11	862			0.219611		SIT4	2	F11	615			-1.25765			ARK1	1	F11	1192			1.08826				SIT4	2	F11	553
	SSK2	1	F12	1218			2.0671		PTC2	2	F12	1031			0.582556				SSK2	1	F12	1111			1.32361		PTC2	2	F12	887			-0.549818			SSK2	1	F12	1344			1.62584				PTC2	2	F12	1002
	YNR047W	1	G1	840			0.200801		MSG5	2	G1	849			-0.124938				YNR047W	1	G1	1025			0.942309		MSG5	2	G1	1070			-0.0735926			YNR047W	1	G1	1043			0.561287				MSG5	2	G1	861
	KSS1	1	G2	708			-0.450921		TPD3	2	G2	485			-1.53992				KSS1	1	G2	702			-0.489785		TPD3	2	G2	435			-1.72607			KSS1	1	G2	669			-0.761452				TPD3	2	G2	467
	DBF2	1	G3	540			-1.28039		ALK1	2	G3	983			0.395964				DBF2	1	G3	780			-0.143955		ALK1	2	G3	1406			0.800788			DBF2	1	G3	537			-1.2283				ALK1	2	G3	1145
	YAK1	1	G4	748			-0.25343		ALK2	2	G4	1194			1.21619				YAK1	1	G4	852			0.175274		ALK2	2	G4	1593			1.28742			YAK1	1	G4	785			-0.35119				ALK2	2	G4	1314
	HAL5	1	G5	663			-0.673099		CKB1	2	G5	1033			0.59033				HAL5	1	G5	746			-0.294701		CKB1	2	G5	1276			0.462486			HAL5	1	G5	705			-0.634129				CKB1	2	G5	1115
	CTK1	1	G6	529			-1.3347		CKB2	2	G6	921			0.15495				CTK1	1	G6	682			-0.57846		CKB2	2	G6	1365			0.694093			CTK1	1	G6	630			-0.899384				CKB2	2	G6	1073
	SSK22	1	G7	778			-0.105311		CLG1	2	G7	1307			1.65546				SSK22	1	G7	605			-0.919857		CLG1	2	G7	1922			2.14359			SSK22	1	G7	894			0.0343139				CLG1	2	G7	1483
	RIM11	1	G8	682			-0.579291		FMP48	2	G8	1416			2.07918				RIM11	1	G8	726			-0.383376		FMP48	2	G8	2199			2.86443			RIM11	1	G8	788			-0.34058				FMP48	2	G8	1561
	HRK1	1	G9	822			0.111929		GAL83	2	G9	1373			1.91202				HRK1	1	G9	816			0.0156595		GAL83	2	G9	1900			2.08634			HRK1	1	G9	1059			0.617875				GAL83	2	G9	1578
	PBS2	1	G10	994			0.961143		IKS1	2	G10	1137			0.994612				PBS2	1	G10	1022			0.929007		IKS1	2	G10	1264			0.431258			PBS2	1	G10	1068			0.649706				IKS1	2	G10	1154
	MLP1	1	G11	1104			1.50424		KDX1	2	G11	1280			1.5505				MLP1	1	G11	1157			1.52756		KDX1	2	G11	1382			0.738332			MLP1	1	G11	1078			0.685073				KDX1	2	G11	1372
	YPK2	1	G12	1229			2.12141		PKP1	2	G12	1602			2.80222				YPK2	1	G12	1226			1.83349		PKP1	2	G12	1877			2.02648			YPK2	1	G12	1653			2.7187				PKP1	2	G12	1935
	YDL025C	1	H1	913			0.561223		PRK1	2	H1	1174			1.13844				YDL025C	1	H1	1058			1.08862		PRK1	2	H1	1564			1.21195			YDL025C	1	H1	1018			0.472869				PRK1	2	H1	1210
	MRK1	1	H2	743			-0.278116		RTR1	2	H2	1113			0.901316				MRK1	1	H2	1026			0.946742		RTR1	2	H2	1502			1.05061			MRK1	1	H2	913			0.101512				RTR1	2	H2	1179
	PKH3	1	H3	830			0.151428		SAK1	2	H3	1130			0.967401				PKH3	1	H3	911			0.436864		SAK1	2	H3	1504			1.05582			PKH3	1	H3	978			0.3314				SAK1	2	H3	1301
	PKH1	1	H4	841			0.205738		SIP1	2	H4	1132			0.975176				PKH1	1	H4	864			0.228478		SIP1	2	H4	1563			1.20935			PKH1	1	H4	819			-0.230941				SIP1	2	H4	1250
	GIN4	1	H5	809			0.0477446		SIP2	2	H5	1211			1.28227				GIN4	1	H5	1000			0.831465		SIP2	2	H5	1362			0.686286			GIN4	1	H5	1116			0.819469				SIP2	2	H5	1339
	SPS1	1	H6	864			0.319295		SNF4	2	H6	1104			0.86633				SPS1	1	H6	940			0.565442		SNF4	2	H6	1580			1.25359			SPS1	1	H6	812			-0.255698				SNF4	2	H6	1197
	RCK1	1	H7	927			0.630345		YCH1	2	H7	1424			2.11028				RCK1	1	H7	930			0.521104		YCH1	2	H7	2228			2.9399			RCK1	1	H7	1126			0.854836				YCH1	2	H7	1664
	TOS3	1	H8	931			0.650094		BLANK	2	H8	0							TOS3	1	H8	973			0.711755		BLANK	2	H8	0						TOS3	1	H8	917			0.115659				BLANK	2	H8	0
	ATG1	1	H9	925			0.62047		BLANK	2	H9	0							ATG1	1	H9	1139			1.44775		BLANK	2	H9	0						ATG1	1	H9	1089			0.723977				BLANK	2	H9	0
	YCK3	1	H10	1060			1.287		TOR1	2	H10	1456			2.23467				YCK3	1	H10	1217			1.79358		TOR1	2	H10	1644			1.42014			YCK3	1	H10	1206			1.13778				TOR1	2	H10	1673
	BLANK	1	H11	0					SNF1	2	H11	1517			2.4718				BLANK	1	H11	0					SNF1	2	H11	1729			1.64134			BLANK	1	H11	0							SNF1	2	H11	1642
	BLANK	1	H12	0					BLANK	2	H12	0							BLANK	1	H12	0					BLANK	2	H12	0						BLANK	1	H12	0							BLANK	2	H12	0
[truncated: 3 more columns]

## Sheet: Control Media - 426-Aly1
	Transformed with:_426-Aly1			Colony Size	Mean Colony Size	Standard Deviation	Z Score					Colony Size	Mean Colony Size	Standard Deviation	Z Score			Transformed with:_426-Aly1			Colony Size	Mean Colony Size	Standard Deviation	Z Score					Colony Size	Mean Colony Size	Standard Deviation	Z Score			Transformed with:_426-Aly1			Colony Size	Mean Colony Size	Standard Deviation	Z Score					Colony Size	Mean Colony Size	Standard Deviation	Z Score
Replicate 1	Standard Name	KinDel PLATE #	location (KinDel)	ENTER DATA BELOW	721.117	222.661			Standard Name	KinDel PLATE #	location (KinDel)	ENTER DATA BELOW	840.14	297.749			Replicate 2	Standard Name	KinDel PLATE #	location (KinDel)	ENTER DATA BELOW	773.511	298.245			Standard Name	KinDel PLATE #	location (KinDel)	ENTER DATA BELOW	816.419	348.936			Replicate 3	Standard Name	KinDel PLATE #	location (KinDel)	ENTER DATA BELOW	762.394	230.361			Standard Name	KinDel PLATE #	location (KinDel)	ENTER DATA BELOW	794.817	305.909
	PSK1	1	A1	905			0.825843		STE11	2	A1	1702			2.89459			PSK1	1	A1	768			-0.0184769		STE11	2	A1	1472			1.8788			PSK1	1	A1	962			0.866496		STE11	2	A1	1303			1.66122
	KIN3	1	A2	770			0.21954		RIM15	2	A2	946			0.355535			KIN3	1	A2	681			-0.310183		RIM15	2	A2	505			-0.892483			KIN3	1	A2	610			-0.661544		RIM15	2	A2	918			0.402678
	KNS1	1	A3	642			-0.355325		VPS15	2	A3	586			-0.853537			KNS1	1	A3	609			-0.551595		VPS15	2	A3	510			-0.878153			KNS1	1	A3	723			-0.171009		VPS15	2	A3	384			-1.34294
	KIN2	1	A4	623			-0.440657		BUD32	2	A4	478			-1.21626			KIN2	1	A4	494			-0.937184		BUD32	2	A4	376			-1.26218			KIN2	1	A4	765			0.0113144		BUD32	2	A4	280			-1.68291
	HOG1	1	A5	733			0.053368		GIP4	2	A5	1073			0.782069			HOG1	1	A5	764			-0.0318887		GIP4	2	A5	644			-0.494129			HOG1	1	A5	919			0.679832		GIP4	2	A5	663			-0.430904
	SKY1	1	A6	344			-1.69368		SPO7	2	A6	810			-0.101225			SKY1	1	A6	440			-1.11824		SPO7	2	A6	492			-0.929739			SKY1	1	A6	459			-1.31704		SPO7	2	A6	645			-0.489745
	YMR291W	1	A7	887			0.745003		PSR1	2	A7	886			0.154023			YMR291W	1	A7	1190			1.39647		PSR1	2	A7	836			0.0561153			YMR291W	1	A7	1076			1.36137		PSR1	2	A7	842			0.154238
	MCK1	1	A8	556			-0.741563		PSR2	2	A8	351			-1.64279			MCK1	1	A8	178			-1.99672		PSR2	2	A8	308			-1.45706			MCK1	1	A8	600			-0.704954		PSR2	2	A8	352			-1.44755
	CLA4	1	A9	876			0.6956		CMP2	2	A9	900			0.201043			CLA4	1	A9	680			-0.313536		CMP2	2	A9	926			0.314042			CLA4	1	A9	833			0.306504		CMP2	2	A9	770			-0.0811262
	CKA2	1	A10	692			-0.130768		PPZ1	2	A10	804			-0.121377			CKA2	1	A10	702			-0.239771		PPZ1	2	A10	584			-0.66608			CKA2	1	A10	607			-0.674567		PPZ1	2	A10	710			-0.277263
	MEK1	1	A11	854			0.596795		MIH1	2	A11	772			-0.22885			MEK1	1	A11	786			0.0418762		MIH1	2	A11	570			-0.706202			MEK1	1	A11	971			0.905565		MIH1	2	A11	660			-0.440711
	PSK2	1	A12	1060			1.52197		ZDS1	2	A12	1139			1.00373			PSK2	1	A12	939			0.554877		ZDS1	2	A12	771			-0.130165			PSK2	1	A12	1002			1.04014		ZDS1	2	A12	1169			1.22318
	YPL236C	1	B1	967			1.10429		RTS1	2	B1	1132			0.980222			YPL236C	1	B1	919			0.487818		RTS1	2	B1	445			-1.06443			YPL236C	1	B1	785			0.0981348		RTS1	2	B1	823			0.0921281
	TPK2	1	B2	726			0.0219301		PTC5	2	B2	664			-0.591571			TPK2	1	B2	653			-0.404066		PTC5	2	B2	643			-0.496995			TPK2	1	B2	676			-0.375037		PTC5	2	B2	569			-0.738185
	YPL150W	1	B3	654			-0.301432		PPQ1	2	B3	719			-0.406852			YPL150W	1	B3	733			-0.13583		PPQ1	2	B3	719			-0.27919			YPL150W	1	B3	627			-0.587747		PPQ1	2	B3	822			0.0888592
	YPL141C	1	B4	657			-0.287958		RRD2	2	B4	733			-0.359833			YPL141C	1	B4	783			0.0318173		RRD2	2	B4	926			0.314042			YPL141C	1	B4	826			0.276117		RRD2	2	B4	702			-0.303415
	MKK2	1	B5	801			0.358765		PPH3	2	B5	963			0.41263			MKK2	1	B5	599			-0.585125		PPH3	2	B5	904			0.250993			MKK2	1	B5	697			-0.283875		PPH3	2	B5	892			0.317686
	KIN1	1	B6	846			0.560866		PPM1	2	B6	492			-1.16924			KIN1	1	B6	718			-0.186124		PPM1	2	B6	206			-1.74937			KIN1	1	B6	1111			1.51331		PPM1	2	B6	567			-0.744723
	SLT2	1	B7	801			0.358765		PPZ2	2	B7	992			0.510028			SLT2	1	B7	933			0.534759		PPZ2	2	B7	701			-0.330775			SLT2	1	B7	604			-0.68759		PPZ2	2	B7	665			-0.424366
	IRE1	1	B8	806			0.381221		GIP2	2	B8	546			-0.987878			IRE1	1	B8	783			0.0318173		GIP2	2	B8	423			-1.12748			IRE1	1	B8	1069			1.33098		GIP2	2	B8	458			-1.10104
	KSP1	1	B9	306			-1.86435		PTP3	2	B9	824			-0.054206			KSP1	1	B9	309			-1.55748		PTP3	2	B9	645			-0.491263			KSP1	1	B9	255			-2.20261		PTP3	2	B9	875			0.262113
	YCK1	1	B10	759			0.170138		PPT1	2	B10	682			-0.531118			YCK1	1	B10	733			-0.13583		PPT1	2	B10	937			0.345567			YCK1	1	B10	760			-0.0103907		PPT1	2	B10	913			0.386334
	KCC4	1	B11	741			0.0892971		RTS3	2	B11	721			-0.400135			KCC4	1	B11	735			-0.129124		RTS3	2	B11	709			-0.307848			KCC4	1	B11	625			-0.596429		RTS3	2	B11	773			-0.0713193
	SAT4	1	B12	780			0.264451		PTC7	2	B12	875			0.117079			SAT4	1	B12	761			-0.0419475		PTC7	2	B12	740			-0.219007			SAT4	1	B12	800			0.16325		PTC7	2	B12	989			0.634774
	ELM1	1	C1	800			0.354274		CNB1	2	C1	1070			0.771993			ELM1	1	C1	862			0.2967		CNB1	2	C1	667			-0.428214			ELM1	1	C1	925			0.705878		CNB1	2	C1	871			0.249038
	HSL1	1	C2	760			0.174629		GAC1	2	C2	396			-1.49166			HSL1	1	C2	629			-0.484536		GAC1	2	C2	312			-1.44559			HSL1	1	C2	768			0.0243374		GAC1	2	C2	320			-1.55215
	PRR1	1	C3	511			-0.943664		PTP2	2	C3	924			0.281647			PRR1	1	C3	569			-0.685713		PTP2	2	C3	860			0.124896			PRR1	1	C3	496			-1.15642		PTP2	2	C3	768			-0.0876641
	YPK1	1	C4	569			-0.683178		PIG1	2	C4	432			-1.37075			YPK1	1	C4	589			-0.618654		PIG1	2	C4	618			-0.568641			YPK1	1	C4	643			-0.51829		PIG1	2	C4	614			-0.591082
	TPK3	1	C5	640			-0.364307		SAP4	2	C5	822			-0.0609231			TPK3	1	C5	675			-0.330301		SAP4	2	C5	704			-0.322178			TPK3	1	C5	544			-0.948051		SAP4	2	C5	498			-0.97028
	KKQ8	1	C6	631			-0.404728		SAP155	2	C6	810			-0.101225			KKQ8	1	C6	980			0.692348		SAP155	2	C6	779			-0.107238			KKQ8	1	C6	613			-0.648521		SAP155	2	C6	623			-0.561662
	YKL171W	1	C7	504			-0.975102		PSY4	2	C7	451			-1.30694			YKL171W	1	C7	960			0.625289		PSY4	2	C7	469			-0.995653			YKL171W	1	C7	1040			1.2051		PSY4	2	C7	353			-1.44428
	MKK1	1	C8	795			0.331818		PTC3	2	C8	791			-0.165038			MKK1	1	C8	1270			1.6647		PTC3	2	C8	731			-0.244799			MKK1	1	C8	1054			1.26587		PTC3	2	C8	747			-0.156312
	KIN4	1	C9	621			-0.449639		BNI4	2	C9	768			-0.242284			KIN4	1	C9	850			0.256465		BNI4	2	C9	1004			0.537579			KIN4	1	C9	867			0.454099		BNI4	2	C9	826			0.101935
	SWE1	1	C10	769			0.215049		PSY2	2	C10	643			-0.662101			SWE1	1	C10	883			0.367112		PSY2	2	C10	763			-0.153092			SWE1	1	C10	879			0.506191		PSY2	2	C10	612			-0.59762
	TPK1	1	C11	758			0.165646		PAM1	2	C11	796			-0.148245			TPK1	1	C11	820			0.155876		PAM1	2	C11	670			-0.419617			TPK1	1	C11	777			0.0634066		PAM1	2	C11	910			0.376527
	STE20	1	C12	1471			3.36782		PIG2	2	C12	912			0.241345			STE20	1	C12	1305			1.78206		PIG2	2	C12	1093			0.79264			STE20	1	C12	1334			2.48136		PIG2	2	C12	1023			0.745918
	RCK2	1	D1	311			-1.84189		YVH1	2	D1	590			-0.840103			RCK2	1	D1	190			-1.95648		YVH1	2	D1	397			-1.20199			RCK2	1	D1	407			-1.54277		YVH1	2	D1	818			0.0757834
	SSN3	1	D2	576			-0.65174		SIS2	2	D2	825			-0.0508475			SSN3	1	D2	767			-0.0218298		SIS2	2	D2	618			-0.568641			SSN3	1	D2	718			-0.192714		SIS2	2	D2	528			-0.872212
	PHO85	1	D3	509			-0.952646		GLC8	2	D3	692			-0.497532			PHO85	1	D3	519			-0.853361		GLC8	2	D3	840			0.0675787			PHO85	1	D3	389			-1.62091		GLC8	2	D3	615			-0.587813
	SKS1	1	D4	573			-0.665213		ZDS2	2	D4	709			-0.440437			SKS1	1	D4	807			0.112288		ZDS2	2	D4	763			-0.153092			SKS1	1	D4	690			-0.314262		ZDS2	2	D4	535			-0.849329
	ISR1	1	D5	684			-0.166698		TIP41	2	D5	664			-0.591571			ISR1	1	D5	943			0.568289		TIP41	2	D5	681			-0.388092			ISR1	1	D5	701			-0.266511		TIP41	2	D5	520			-0.898363
	DBF20	1	D6	676			-0.202627		LTP1	2	D6	647			-0.648666			DBF20	1	D6	1436			2.22129		LTP1	2	D6	842			0.0733104			DBF20	1	D6	902			0.606034		LTP1	2	D6	559			-0.770874
	KIN82	1	D7	299			-1.89578		SAP185	2	D7	772			-0.22885			KIN82	1	D7	21			-2.52313		SAP185	2	D7	757			-0.170287			KIN82	1	D7	261			-2.17656		SAP185	2	D7	753			-0.136698
	FUS3	1	D8	294			-1.91824		YMR1	2	D8	558			-0.947576			FUS3	1	D8	360			-1.38648		YMR1	2	D8	602			-0.614495			FUS3	1	D8	283			-2.08106		YMR1	2	D8	698			-0.316491
	TEL1	1	D9	290			-1.9362		NEM1	2	D9	372			-1.57226			TEL1	1	D9	129			-2.16101		NEM1	2	D9	101			-2.05029			TEL1	1	D9	683			-0.344649		NEM1	2	D9	373			-1.3789
	YGL059W	1	D10	738			0.0758237		CNA1	2	D10	368			-1.5857			YGL059W	1	D10	1018			0.81976		CNA1	2	D10	151			-1.907			YGL059W	1	D10	817			0.237047		CNA1	2	D10	273			-1.70579
	NPR1	1	D11	844			0.551884		PTP1	2	D11	678			-0.544552			NPR1	1	D11	852			0.263171		PTP1	2	D11	781			-0.101507			NPR1	1	D11	1006			1.0575		PTP1	2	D11	728			-0.218422
	YCK2	1	D12	983			1.17615		PHO13	2	D12	933			0.311874			YCK2	1	D12	927			0.514642		PHO13	2	D12	765			-0.14736			YCK2	1	D12	849			0.37596		PHO13	2	D12	1007			0.693615
	PTK1	1	E1	866			0.650689		REG1	2	E1	1040			0.671237			PTK1	1	E1	839			0.219582		REG1	2	E1	1074			0.738189			PTK1	1	E1	935			0.749288		REG1	2	E1	723			-0.234767
	VHS1	1	E2	270			-2.02603		PTC6	2	E2	694			-0.490815			VHS1	1	E2	275			-1.67148		PTC6	2	E2	761			-0.158824			VHS1	1	E2	292			-2.04199		PTC6	2	E2	622			-0.564931
	GCN2	1	E3	806			0.381221		PPH21	2	E3	668			-0.578137			GCN2	1	E3	551			-0.746066		PPH21	2	E3	850			0.0962373			GCN2	1	E3	708			-0.236124		PPH21	2	E3	676			-0.388407
	CKA1	1	E4	626			-0.427183		PPH22	2	E4	754			-0.289303			CKA1	1	E4	804			0.102229		PPH22	2	E4	814			-0.00693352			CKA1	1	E4	847			0.367278		PPH22	2	E4	765			-0.0974709
	CMK1	1	E5	588			-0.597846		GIP1	2	E5	836			-0.0139036			CMK1	1	E5	691			-0.276654		GIP1	2	E5	799			-0.0499213			CMK1	1	E5	857			0.410688		GIP1	2	E5	615			-0.587813
	PKH2	1	E6	862			0.632724		REG2	2	E6	714			-0.423645			PKH2	1	E6	1343			1.90947		REG2	2	E6	833			0.0475177			PKH2	1	E6	850			0.380301		REG2	2	E6	794			-0.0026714
	SKM1	1	E7	350			-1.66674		YBR051W	2	E7	773			-0.225491			SKM1	1	E7	171			-2.02019		YBR051W	2	E7	497			-0.915409			SKM1	1	E7	504			-1.12169		YBR051W	2	E7	634			-0.525703
	YGK3	1	E8	743			0.0982794		SIW14	2	E8	799			-0.138169			YGK3	1	E8	1078			1.02094		SIW14	2	E8	591			-0.646019			YGK3	1	E8	850			0.380301		SIW14	2	E8	691			-0.339373
	CMK2	1	E9	715			-0.0274724		PPG1	2	E9	641			-0.668818			CMK2	1	E9	1080			1.02764		PPG1	2	E9	840			0.0675787			CMK2	1	E9	958			0.849131		PPG1	2	E9	877			0.268651
	CTK3	1	E10	320			-1.80147		TEP1	2	E10	949			0.365611			CTK3	1	E10	274			-1.67483		TEP1	2	E10	866			0.142091			CTK3	1	E10	274			-2.12013		TEP1	2	E10	717			-0.25438
	SMK1	1	E11	692			-0.130768		SDP1	2	E11	693			-0.494174			SMK1	1	E11	779			0.0184055		SDP1	2	E11	795			-0.0613848			SMK1	1	E11	635			-0.553018		SDP1	2	E11	652			-0.466862
	IME2	1	E12	707			-0.0634014		RRD1	2	E12	824			-0.054206			IME2	1	E12	672			-0.34036		RRD1	2	E12	589			-0.651751			IME2	1	E12	787			0.106817		RRD1	2	E12	919			0.405947
	BCK1	1	F1	770			0.21954		OCA1	2	F1	1256			1.39668			BCK1	1	F1	731			-0.142536		OCA1	2	F1	1121			0.872884			BCK1	1	F1	748			-0.062483		OCA1	2	F1	851			0.183659
	BUB1	1	F2	627			-0.422692		SAP190	2	F2	403			-1.46815			BUB1	1	F2	695			-0.263242		SAP190	2	F2	392			-1.21632			BUB1	1	F2	708			-0.236124		SAP190	2	F2	357			-1.4312
	PRR2	1	F3	310			-1.84638		PTC4	2	F3	206			-2.12978			PRR2	1	F3	28			-2.49966		PTC4	2	F3	334			-1.38254			PRR2	1	F3	317			-1.93346		PTC4	2	F3	233			-1.83655
	CHK1	1	F4	697			-0.108313		PPS1	2	F4	763			-0.259077			CHK1	1	F4	858			0.283288		PPS1	2	F4	663			-0.439678			CHK1	1	F4	743			-0.0841881		PPS1	2	F4	684			-0.362256
	CTK2	1	F5	630			-0.409219		DCR2	2	F5	755			-0.285945			CTK2	1	F5	971			0.662171		DCR2	2	F5	445			-1.06443			CTK2	1	F5	665			-0.422788		DCR2	2	F5	801			0.0202112
	PTK2	1	F6	657			-0.287958		GIP3	2	F6	644			-0.658742			PTK2	1	F6	674			-0.333654		GIP3	2	F6	719			-0.27919			PTK2	1	F6	707			-0.240465		GIP3	2	F6	557			-0.777412
	DUN1	1	F7	349			-1.67123		YSW1	2	F7	725			-0.386701			DUN1	1	F7	278			-1.66142		YSW1	2	F7	862			0.130628			DUN1	1	F7	324			-1.90308		YSW1	2	F7	722			-0.238036
	STE7	1	F8	1285			2.53247		PTC1	2	F8	316			-1.76034			STE7	1	F8	854			0.269877		PTC1	2	F8	373			-1.27078			STE7	1	F8	1405			2.78957		PTC1	2	F8	333			-1.50966
	YBR028C	1	F9	1274			2.48307		PHO8	2	F9	693			-0.494174			YBR028C	1	F9	1488			2.39564		PHO8	2	F9	873			0.162152			YBR028C	1	F9	1268			2.19485		PHO8	2	F9	700			-0.309953
	AKL1	1	F10	703			-0.081366		YER134C	2	F10	568			-0.913991			AKL1	1	F10	886			0.377171		YER134C	2	F10	662			-0.442543			AKL1	1	F10	783			0.0894527		YER134C	2	F10	609			-0.607427
	ARK1	1	F11	762			0.183611		SIT4	2	F11	1211			1.24555			ARK1	1	F11	878			0.350347		SIT4	2	F11	1281			1.33142			ARK1	1	F11	774			0.0503836		SIT4	2	F11	1131			1.09896
	SSK2	1	F12	1097			1.68814		PTC2	2	F12	853			0.0431915			SSK2	1	F12	1068			0.987407		PTC2	2	F12	920			0.296847			SSK2	1	F12	1005			1.05316		PTC2	2	F12	951			0.510554
	YNR047W	1	G1	900			0.803387		MSG5	2	G1	546			-0.987878			YNR047W	1	G1	956			0.611877		MSG5	2	G1	496			-0.918275			YNR047W	1	G1	908			0.63208		MSG5	2	G1	560			-0.767606
	KSS1	1	G2	701			-0.0903482		TPD3	2	G2	294			-1.83423			KSS1	1	G2	825			0.172641		TPD3	2	G2	414			-1.15328			KSS1	1	G2	699			-0.275193		TPD3	2	G2	284			-1.66984
	DBF2	1	G3	602			-0.53497		ALK1	2	G3	1133			0.983581			DBF2	1	G3	759			-0.0486534		ALK1	2	G3	1340			1.50051			DBF2	1	G3	729			-0.144962		ALK1	2	G3	1106			1.01724
	YAK1	1	G4	725			0.017439		ALK2	2	G4	1156			1.06083			YAK1	1	G4	809			0.118994		ALK2	2	G4	1319			1.44032			YAK1	1	G4	780			0.0764297		ALK2	2	G4	1243			1.46509
	HAL5	1	G5	316			-1.81943		CKB1	2	G5	986			0.489876			HAL5	1	G5	262			-1.71507		CKB1	2	G5	1084			0.766847			HAL5	1	G5	187			-2.4978		CKB1	2	G5	809			0.0463628
	CTK1	1	G6	783			0.277925		CKB2	2	G6	880			0.133872			CTK1	1	G6	854			0.269877		CKB2	2	G6	854			0.107701			CTK1	1	G6	881			0.514873		CKB2	2	G6	899			0.340568
	SSK22	1	G7	854			0.596795		CLG1	2	G7	1165			1.09105			SSK22	1	G7	1180			1.36294		CLG1	2	G7	1360			1.55782			SSK22	1	G7	682			-0.34899		CLG1	2	G7	1115			1.04666
	RIM11	1	G8	677			-0.198135		FMP48	2	G8	1273			1.45378			RIM11	1	G8	1052			0.93376		FMP48	2	G8	1432			1.76416			RIM11	1	G8	754			-0.0364369		FMP48	2	G8	1451			2.14503
	HRK1	1	G9	763			0.188102		GAL83	2	G9	1408			1.90718			HRK1	1	G9	1172			1.33611		GAL83	2	G9	1230			1.18526			HRK1	1	G9	992			0.996726		GAL83	2	G9	1451			2.14503
	PBS2	1	G10	916			0.875246		IKS1	2	G10	1076			0.792144			PBS2	1	G10	1070			0.994113		IKS1	2	G10	1283			1.33715			PBS2	1	G10	819			0.24573		IKS1	2	G10	1059			0.8636
	MLP1	1	G11	878			0.704582		KDX1	2	G11	1222			1.28249			MLP1	1	G11	860			0.289994		KDX1	2	G11	1149			0.953128			MLP1	1	G11	834			0.310845		KDX1	2	G11	1334			1.76256
	YPK2	1	G12	1068			1.5579		PKP1	2	G12	1450			2.04824			YPK2	1	G12	907			0.447583		PKP1	2	G12	1720			2.58953			YPK2	1	G12	1015			1.09657		PKP1	2	G12	1575			2.55038
	YDL025C	1	H1	989			1.2031		PRK1	2	H1	1428			1.97435			YDL025C	1	H1	697			-0.256536		PRK1	2	H1	1636			2.3488			YDL025C	1	H1	959			0.853472		PRK1	2	H1	1433			2.08619
	MRK1	1	H2	756			0.156664		RTR1	2	H2	1327			1.63514			MRK1	1	H2	881			0.360406		RTR1	2	H2	1284			1.34002			MRK1	1	H2	754			-0.0364369		RTR1	2	H2	1082			0.938786
	PKH3	1	H3	838			0.524937		SAK1	2	H3	1089			0.835805			PKH3	1	H3	820			0.155876		SAK1	2	H3	1162			0.990384			PKH3	1	H3	726			-0.157985		SAK1	2	H3	1005			0.687077
	PKH1	1	H4	766			0.201575		SIP1	2	H4	1228			1.30264			PKH1	1	H4	856			0.276582		SIP1	2	H4	1335			1.48618			PKH1	1	H4	838			0.328209		SIP1	2	H4	1131			1.09896
	GIN4	1	H5	901			0.807879		SIP2	2	H5	1184			1.15487			GIN4	1	H5	912			0.464347		SIP2	2	H5	1331			1.47471			GIN4	1	H5	898			0.58867		SIP2	2	H5	1138			1.12185
	SPS1	1	H6	832			0.49799		SNF4	2	H6	1132			0.980222			SPS1	1	H6	1143			1.23888		SNF4	2	H6	1229			1.1824			SPS1	1	H6	881			0.514873		SNF4	2	H6	1074			0.912634
	RCK1	1	H7	834			0.506973		YCH1	2	H7	1406			1.90046			RCK1	1	H7	840			0.222935		YCH1	2	H7	1550			2.10234			RCK1	1	H7	873			0.480145		YCH1	2	H7	1405			1.99466
	TOS3	1	H8	777			0.250978		BLANK	2	H8	0						TOS3	1	H8	1146			1.24894		BLANK	2	H8	0						TOS3	1	H8	840			0.336891		BLANK	2	H8	0
	ATG1	1	H9	919			0.888719		BLANK	2	H9	0						ATG1	1	H9	413			-1.20877		BLANK	2	H9	0						ATG1	1	H9	771			0.0373605		BLANK	2	H9	0
	YCK3	1	H10	892			0.767458		TOR1	2	H10	1302			1.55117			YCK3	1	H10	1079			1.02429		TOR1	2	H10	1298			1.38014			YCK3	1	H10	893			0.566965		TOR1	2	H10	1427			2.06657
	BLANK	1	H11	0					SNF1	2	H11	1257			1.40004			BLANK	1	H11	0					SNF1	2	H11	1507			1.9791			BLANK	1	H11	0					SNF1	2	H11	1407			2.00119
	BLANK	1	H12	436					BLANK	2	H12	0						BLANK	1	H12	1102					BLANK	2	H12	0						BLANK	1	H12	955					BLANK	2	H12	0

## Sheet: Control Media - 426-Aly2
	Transformed with: __426-Aly2_			Colony Size	Mean Colony Size	Standard Deviation	Z Score					Colony Size	Mean Colony Size	Standard Deviation	Z Score			Transformed with: __426-Aly2_			Colony Size	Mean Colony Size	Standard Deviation	Z Score					Colony Size	Mean Colony Size	Standard Deviation	Z Score
Replicate 1	Standard Name	KinDel PLATE #	location (KinDel)	ENTER DATA BELOW	776.734	176.062			Standard Name	KinDel PLATE #	location (KinDel)	ENTER DATA BELOW	867.097	282.981			Replicate 2	Standard Name	KinDel PLATE #	location (KinDel)	ENTER DATA BELOW	758	172.399			Standard Name	KinDel PLATE #	location (KinDel)	ENTER DATA BELOW	219.516	97.1446
	PSK1	1	A1	1202			2.41543		STE11	2	A1	1896			3.63594			PSK1	1	A1	887			0.748266		STE11	2	A1	238			0.190272
	KIN3	1	A2	884			0.60925		RIM15	2	A2	846			-0.0745518			KIN3	1	A2	612			-0.846874		RIM15	2	A2	125			-0.972942
	KNS1	1	A3	766			-0.0609672		VPS15	2	A3	595			-0.961536			KNS1	1	A3	646			-0.649657		VPS15	2	A3	17			-2.08469
	KIN2	1	A4	699			-0.441514		BUD32	2	A4	387			-1.69657			KIN2	1	A4	602			-0.90488		BUD32	2	A4	41			-1.83763
	HOG1	1	A5	739			-0.214322		GIP4	2	A5	955			0.310633			HOG1	1	A5	647			-0.643857		GIP4	2	A5	336			1.19908
	SKY1	1	A6	833			0.31958		SPO7	2	A6	518			-1.23364			SKY1	1	A6	901			0.829473		SPO7	2	A6	217			-0.0259009
	YMR291W	1	A7	916			0.791003		PSR1	2	A7	948			0.285896			YMR291W	1	A7	754			-0.023202		PSR1	2	A7	206			-0.139134
	MCK1	1	A8	911			0.762604		PSR2	2	A8	870			0.0102594			MCK1	1	A8	780			0.127611		PSR2	2	A8	170			-0.509716
	CLA4	1	A9	881			0.59221		CMP2	2	A9	903			0.126875			CLA4	1	A9	787			0.168215		CMP2	2	A9	170			-0.509716
	CKA2	1	A10	723			-0.305199		PPZ1	2	A10	796			-0.251242			CKA2	1	A10	731			-0.156614		PPZ1	2	A10	204			-0.159722
	MEK1	1	A11	899			0.694447		MIH1	2	A11	931			0.225821			MEK1	1	A11	776			0.104409		MIH1	2	A11	266			0.478502
	PSK2	1	A12	1086			1.75657		ZDS1	2	A12	1150			0.999724			PSK2	1	A12	1022			1.53133		ZDS1	2	A12	246			0.272623
	YPL236C	1	B1	967			1.08067		RTS1	2	B1	418			-1.58702			YPL236C	1	B1	787			0.168215		RTS1	2	B1	229			0.0976263
	TPK2	1	B2	713			-0.361997		PTC5	2	B2	842			-0.088687			TPK2	1	B2	699			-0.34223		PTC5	2	B2	229			0.0976263
	YPL150W	1	B3	680			-0.54943		PPQ1	2	B3	920			0.186949			YPL150W	1	B3	662			-0.556849		PPQ1	2	B3	171			-0.499422
	YPL141C	1	B4	739			-0.214322		RRD2	2	B4	792			-0.265377			YPL141C	1	B4	673			-0.493043		RRD2	2	B4	465			2.52699
	MKK2	1	B5	745			-0.180243		PPH3	2	B5	779			-0.311317			MKK2	1	B5	755			-0.0174015		PPH3	2	B5	358			1.42554
	KIN1	1	B6	781			0.0242298		PPM1	2	B6	811			-0.198235			KIN1	1	B6	720			-0.220419		PPM1	2	B6	348			1.3226
	SLT2	1	B7	213			-3.2019		PPZ2	2	B7	803			-0.226505			SLT2	1	B7	215			-3.14968		PPZ2	2	B7	231			0.118214
	IRE1	1	B8	854			0.438855		GIP2	2	B8	426			-1.55875			IRE1	1	B8	809			0.295826		GIP2	2	B8	113			-1.09647
	KSP1	1	B9	685			-0.521031		PTP3	2	B9	798			-0.244174			KSP1	1	B9	812			0.313228		PTP3	2	B9	199			-0.211192
	YCK1	1	B10	770			-0.038248		PPT1	2	B10	750			-0.413797			YCK1	1	B10	715			-0.249422		PPT1	2	B10	248			0.293211
	KCC4	1	B11	833			0.31958		RTS3	2	B11	760			-0.378459			KCC4	1	B11	809			0.295826		RTS3	2	B11	80			-1.43617
	SAT4	1	B12	817			0.228703		PTC7	2	B12	959			0.324768			SAT4	1	B12	793			0.203018		PTC7	2	B12	219			-0.005313
	ELM1	1	C1	1045			1.5237		CNB1	2	C1	1013			0.515593			ELM1	1	C1	979			1.28191		CNB1	2	C1	218			-0.0156069
	HSL1	1	C2	768			-0.0496076		GAC1	2	C2	758			-0.385526			HSL1	1	C2	707			-0.295826		GAC1	2	C2	228			0.0873324
	PRR1	1	C3	746			-0.174563		PTP2	2	C3	626			-0.851988			PRR1	1	C3	688			-0.406036		PTP2	2	C3	305			0.879965
	YPK1	1	C4	551			-1.28212		PIG1	2	C4	755			-0.396128			YPK1	1	C4	621			-0.79467		PIG1	2	C4	239			0.200566
	TPK3	1	C5	575			-1.14581		SAP4	2	C5	610			-0.908529			TPK3	1	C5	691			-0.388634		SAP4	2	C5	260			0.416738
	KKQ8	1	C6	728			-0.2768		SAP155	2	C6	740			-0.449135			KKQ8	1	C6	794			0.208818		SAP155	2	C6	250			0.313799
	YKL171W	1	C7	696			-0.458553		PSY4	2	C7	444			-1.49514			YKL171W	1	C7	674			-0.487243		PSY4	2	C7	157			-0.643537
	MKK1	1	C8	768			-0.0496076		PTC3	2	C8	810			-0.201769			MKK1	1	C8	800			0.243621		PTC3	2	C8	246			0.272623
	KIN4	1	C9	689			-0.498312		BNI4	2	C9	646			-0.781312			KIN4	1	C9	616			-0.823672		BNI4	2	C9	146			-0.75677
	SWE1	1	C10	824			0.268461		PSY2	2	C10	732			-0.477405			SWE1	1	C10	831			0.423437		PSY2	2	C10	321			1.04467
	TPK1	1	C11	856			0.450215		PAM1	2	C11	847			-0.071018			TPK1	1	C11	847			0.516245		PAM1	2	C11	210			-0.0979584
	STE20	1	C12	1436			3.7445		PIG2	2	C12	953			0.303565			STE20	1	C12	1531			4.48379		PIG2	2	C12	236			0.169684
	RCK2	1	D1	946			0.961397		YVH1	2	D1	544			-1.14176			RCK2	1	D1	823			0.377033		YVH1	2	D1	211			-0.0876644
	SSN3	1	D2	456			-1.82171		SIS2	2	D2	825			-0.148762			SSN3	1	D2	463			-1.71115		SIS2	2	D2	66			-1.58028
	PHO85	1	D3	507			-1.53204		GLC8	2	D3	697			-0.601088			PHO85	1	D3	576			-1.05569		GLC8	2	D3	326			1.09614
	SKS1	1	D4	661			-0.657347		ZDS2	2	D4	886			0.0668002			SKS1	1	D4	666			-0.533647		ZDS2	2	D4	224			0.0461567
	ISR1	1	D5	643			-0.759583		TIP41	2	D5	666			-0.710636			ISR1	1	D5	574			-1.06729		TIP41	2	D5	471			2.58876
	DBF20	1	D6	734			-0.242721		LTP1	2	D6	715			-0.53748			DBF20	1	D6	749			-0.0522046		LTP1	2	D6	177			-0.437658
	KIN82	1	D7	755			-0.123445		SAP185	2	D7	911			0.155145			KIN82	1	D7	817			0.34223		SAP185	2	D7	274			0.560853
	FUS3	1	D8	663			-0.645987		YMR1	2	D8	737			-0.459736			FUS3	1	D8	843			0.493043		YMR1	2	D8	192			-0.283249
	TEL1	1	D9	661			-0.657347		NEM1	2	D9	722			-0.512743			TEL1	1	D9	705			-0.307427		NEM1	2	D9	0			-2.25968
	YGL059W	1	D10	658			-0.674386		CNA1	2	D10	725			-0.502142			YGL059W	1	D10	723			-0.203018		CNA1	2	D10	193			-0.272955
	NPR1	1	D11	842			0.370698		PTP1	2	D11	757			-0.38906			NPR1	1	D11	833			0.435038		PTP1	2	D11	241			0.221153
	YCK2	1	D12	910			0.756924		PHO13	2	D12	928			0.21522			YCK2	1	D12	966			1.20651		PHO13	2	D12	215			-0.0464887
	PTK1	1	E1	979			1.14883		REG1	2	E1	955			0.310633			PTK1	1	E1	899			0.817872		REG1	2	E1	29			-1.96116
	VHS1	1	E2	768			-0.0496076		PTC6	2	E2	628			-0.844921			VHS1	1	E2	688			-0.406036		PTC6	2	E2	77			-1.46705
	GCN2	1	E3	324			-2.57144		PPH21	2	E3	676			-0.675298			GCN2	1	E3	341			-2.41881		PPH21	2	E3	238			0.190272
	CKA1	1	E4	730			-0.26544		PPH22	2	E4	531			-1.1877			CKA1	1	E4	812			0.313228		PPH22	2	E4	386			1.71377
	CMK1	1	E5	748			-0.163204		GIP1	2	E5	775			-0.325452			CMK1	1	E5	740			-0.104409		GIP1	2	E5	383			1.68289
	PKH2	1	E6	700			-0.435834		REG2	2	E6	723			-0.509209			PKH2	1	E6	767			0.0522046		REG2	2	E6	243			0.241741
	SKM1	1	E7	570			-1.17421		YBR051W	2	E7	779			-0.311317			SKM1	1	E7	563			-1.1311		YBR051W	2	E7	122			-1.00382
	YGK3	1	E8	725			-0.293839		SIW14	2	E8	756			-0.392594			YGK3	1	E8	695			-0.365432		SIW14	2	E8	215			-0.0464887
	CMK2	1	E9	732			-0.254081		PPG1	2	E9	713			-0.544547			CMK2	1	E9	729			-0.168215		PPG1	2	E9	132			-0.900885
	CTK3	1	E10	685			-0.521031		TEP1	2	E10	877			0.034996			CTK3	1	E10	660			-0.56845		TEP1	2	E10	176			-0.447952
	SMK1	1	E11	610			-0.947017		SDP1	2	E11	665			-0.71417			SMK1	1	E11	633			-0.725064		SDP1	2	E11	264			0.457914
	IME2	1	E12	866			0.507013		RRD1	2	E12	891			0.0844693			IME2	1	E12	745			-0.0754066		RRD1	2	E12	418			2.04318
	BCK1	1	F1	1044			1.51802		OCA1	2	F1	1121			0.897244			BCK1	1	F1	884			0.730864		OCA1	2	F1	245			0.262329
	BUB1	1	F2	439			-1.91826		SAP190	2	F2	762			-0.371391			BUB1	1	F2	327			-2.50002		SAP190	2	F2	370			1.54907
	PRR2	1	F3	679			-0.55511		PTC4	2	F3	711			-0.551615			PRR2	1	F3	675			-0.481442		PTC4	2	F3	246			0.272623
	CHK1	1	F4	478			-1.69675		PPS1	2	F4	902			0.123341			CHK1	1	F4	452			-1.77496		PPS1	2	F4	179			-0.41707
	CTK2	1	F5	660			-0.663026		DCR2	2	F5	615			-0.89086			CTK2	1	F5	688			-0.406036		DCR2	2	F5	326			1.09614
	PTK2	1	F6	717			-0.339278		GIP3	2	F6	735			-0.466804			PTK2	1	F6	660			-0.56845		GIP3	2	F6	211			-0.0876644
	DUN1	1	F7	675			-0.577829		YSW1	2	F7	668			-0.703568			DUN1	1	F7	817			0.34223		YSW1	2	F7	201			-0.190604
	STE7	1	F8	1181			2.29615		PTC1	2	F8	388			-1.69303			STE7	1	F8	1306			3.17868		PTC1	2	F8	63			-1.61117
	YBR028C	1	F9	777			0.00151059		PHO8	2	F9	674			-0.682366			YBR028C	1	F9	753			-0.0290025		PHO8	2	F9	191			-0.293543
	AKL1	1	F10	749			-0.157524		YER134C	2	F10	658			-0.738906			AKL1	1	F10	666			-0.533647		YER134C	2	F10	85			-1.3847
	ARK1	1	F11	762			-0.0836865		SIT4	2	F11	619			-0.876725			ARK1	1	F11	718			-0.23202		SIT4	2	F11	368			1.52848
	SSK2	1	F12	1010			1.3249		PTC2	2	F12	850			-0.0604166			SSK2	1	F12	1014			1.48493		PTC2	2	F12	112			-1.10676
	YNR047W	1	G1	879			0.580851		MSG5	2	G1	1037			0.600404			YNR047W	1	G1	942			1.06729		MSG5	2	G1	253			0.344681
	KSS1	1	G2	657			-0.680066		TPD3	2	G2	410			-1.61529			KSS1	1	G2	795			0.214619		TPD3	2	G2	256			0.375562
	DBF2	1	G3	813			0.205984		ALK1	2	G3	1037			0.600404			DBF2	1	G3	631			-0.736665		ALK1	2	G3	326			1.09614
	YAK1	1	G4	724			-0.299519		ALK2	2	G4	1073			0.727621			YAK1	1	G4	831			0.423437		ALK2	2	G4	196			-0.242073
	HAL5	1	G5	572			-1.16285		CKB1	2	G5	1029			0.572134			HAL5	1	G5	634			-0.719263		CKB1	2	G5	76			-1.47735
	CTK1	1	G6	723			-0.305199		CKB2	2	G6	872			0.017327			CTK1	1	G6	709			-0.284225		CKB2	2	G6	63			-1.61117
	SSK22	1	G7	727			-0.28248		CLG1	2	G7	1277			1.44852			SSK22	1	G7	731			-0.156614		CLG1	2	G7	180			-0.406776
	RIM11	1	G8	650			-0.719824		FMP48	2	G8	1336			1.65701			RIM11	1	G8	621			-0.79467		FMP48	2	G8	190			-0.303837
	HRK1	1	G9	749			-0.157524		GAL83	2	G9	1299			1.52626			HRK1	1	G9	771			0.0754066		GAL83	2	G9	205			-0.149428
	PBS2	1	G10	782			0.0299096		IKS1	2	G10	1135			0.946717			PBS2	1	G10	807			0.284225		IKS1	2	G10	452			2.39317
	MLP1	1	G11	830			0.30254		KDX1	2	G11	1355			1.72415			MLP1	1	G11	807			0.284225		KDX1	2	G11	299			0.818201
	YPK2	1	G12	1051			1.55778		PKP1	2	G12	1732			3.0564			YPK2	1	G12	974			1.25291		PKP1	2	G12	305			0.879965
	YDL025C	1	H1	960			1.04091		PRK1	2	H1	1244			1.3319			YDL025C	1	H1	1024			1.54294		PRK1	2	H1	251			0.324093
	MRK1	1	H2	788			0.0639884		RTR1	2	H2	1238			1.3107			MRK1	1	H2	719			-0.22622		RTR1	2	H2	204			-0.159722
	PKH3	1	H3	854			0.438855		SAK1	2	H3	1132			0.936115			PKH3	1	H3	842			0.487243		SAK1	2	H3	163			-0.581773
	PKH1	1	H4	787			0.0583086		SIP1	2	H4	1132			0.936115			PKH1	1	H4	755			-0.0174015		SIP1	2	H4	208			-0.118546
	GIN4	1	H5	986			1.18859		SIP2	2	H5	1150			0.999724			GIN4	1	H5	977			1.27031		SIP2	2	H5	154			-0.674418
	SPS1	1	H6	830			0.30254		SNF4	2	H6	1162			1.04213			SPS1	1	H6	891			0.771468		SNF4	2	H6	296			0.78732
	RCK1	1	H7	917			0.796683		YCH1	2	H7	1448			2.0528			RCK1	1	H7	847			0.516245		YCH1	2	H7	206			-0.139134
	TOS3	1	H8	820			0.245742		BLANK	2	H8	0						TOS3	1	H8	812			0.313228		BLANK	2	H8	0
	ATG1	1	H9	885			0.614929		BLANK	2	H9	0						ATG1	1	H9	888			0.754066		BLANK	2	H9	0
	YCK3	1	H10	967			1.08067		TOR1	2	H10	1588			2.54753			YCK3	1	H10	901			0.829473		TOR1	2	H10	86			-1.37441
	BLANK	1	H11	556					SNF1	2	H11	1382			1.81957			BLANK	1	H11	776					SNF1	2	H11	234			0.149096
	BLANK	1	H12	537					BLANK	2	H12	0						BLANK	1	H12	870					BLANK	2	H12	0

## Sheet: Col Siz change - 0.8M NaCl
0.8M NaCl	Vector Data			Aly1 Data				Aly1:	Mean Size change	Std Dev		Aly2 Data				Aly2:	Mean Size change	Std Dev
Standard Name	Avg Colony Size	Std Dev		Avg Colony Size	Std Dev	Change from Vector		Vector Change Z Score	-137.316	94.3882		Avg Colony Size	Std Dev	Change from Vector		Vector Change Z Score	-92.7589	113.558
PSK1	483	58.9491		314	90.0666	-169	PSK1	-0.335682				436.333	176.964	-46.6667	PSK1	0.405891
KIN3	374	44.3058		321.333	131.683	-52.6667	KIN3	0.896817				331.667	163.574	-42.3333	KIN3	0.444051
KNS1	367	23.0651		152.667	44.1852	-214.333	KNS1	-0.815968				186.333	47.3533	-180.667	KNS1	-0.774123
KIN2	188	31.4325		102.667	85.9903	-85.3333	KIN2	0.550729				148.667	94.1559	-39.3333	KIN2	0.470469
HOG1	391	11.7898		275.667	56.8712	-115.333	HOG1	0.232892				292.333	87.5348	-98.6667	HOG1	-0.0520245
SKY1	597.333	18.1751		227	92.6769	-370.333	SKY1	-2.46872				312.667	75.1953	-284.667	SKY1	-1.68995
YMR291W	513.667	42.194		381.667	80.8229	-132	YMR291W	0.0563164				369.333	134.99	-144.333	YMR291W	-0.454169
MCK1	1	1		41.6667	12.3423	40.6667	MCK1	1.88564				378	130.088	377	MCK1	4.13673
CLA4	182	12.1244		305.667	120.981	123.667	CLA4	2.76499				334.667	125.48	152.667	CLA4	2.16124
CKA2	513.667	17.4738		319.333	44.0946	-194.333	CKA2	-0.604077				364.667	165.186	-149	CKA2	-0.495264
MEK1	485.333	56.0476		305.667	115.889	-179.667	MEK1	-0.44869				369.333	148.005	-116	MEK1	-0.204663
PSK2	524.667	45.5448		362.333	123.896	-162.333	PSK2	-0.265052				403.333	199.134	-121.333	PSK2	-0.251629
YPL236C	410	47.2864		281.667	116.105	-128.333	YPL236C	0.0951631				348.333	163.934	-61.6667	YPL236C	0.2738
TPK2	415.667	13.6504		252.333	153.806	-163.333	TPK2	-0.275646				292.333	100.127	-123.333	TPK2	-0.269241
YPL150W	268.333	53.2572		259	108.499	-9.33333	YPL150W	1.35591				285	125.654	16.6667	YPL150W	0.963609
YPL141C	269	69.5485		223.333	45.742	-45.6667	YPL141C	0.970979				284.333	112.046	15.3333	YPL141C	0.951868
MKK2	385.667	85.278		273	141.552	-112.667	MKK2	0.261144				348.667	119.069	-37	MKK2	0.491017
KIN1	384.667	49.5008		310.333	94.9438	-74.3333	KIN1	0.667269				346.667	88.07	-38	KIN1	0.482211
SLT2	424.667	52.9371		260	69.0724	-164.667	SLT2	-0.289772				112.667	97.6542	-312	SLT2	-1.93065
IRE1	479.333	34.9333		406.667	5.68624	-72.6667	IRE1	0.684926				425	185.572	-54.3333	IRE1	0.338378
KSP1	211	53.507		149	58.9661	-62	KSP1	0.797935				319.667	101.422	108.667	KSP1	1.77377
YCK1	438.667	43.9811		318.667	81.6844	-120	YCK1	0.183451				340.667	119.001	-98	YCK1	-0.0461538
KCC4	509.333	31.8957		324	115.326	-185.333	KCC4	-0.508726				334.333	96.8005	-175	KCC4	-0.724222
SAT4	205	39.3446		114.333	60.0777	-90.6667	SAT4	0.494224				159	82.456	-46	SAT4	0.411762
ELM1	506.667	34.5881		297.667	80.3264	-209	ELM1	-0.759464				385.667	141.047	-121	ELM1	-0.248694
HSL1	364	44		251.667	89.2767	-112.333	HSL1	0.264676				301	99.3781	-63	HSL1	0.262059
PRR1	333	38.3145		289.667	167.255	-43.3333	PRR1	0.9957				360	141.035	27	PRR1	1.05461
YPK1	543.667	68.8791		346.667	95.007	-197	YPK1	-0.632329				364.667	170.94	-179	YPK1	-0.759446
TPK3	460	36.7151		343	128.187	-117	TPK3	0.215235				215.667	63.0026	-244.333	TPK3	-1.33478
KKQ8	439	31.1929		283.333	79.5005	-155.667	KKQ8	-0.194421				327.333	104.414	-111.667	KKQ8	-0.166503
YKL171W	412.667	16.7432		281.667	91.7842	-131	YKL171W	0.066911				368.333	127.602	-44.3333	YKL171W	0.426439
MKK1	404.333	34.8186		347.667	81.2978	-56.6667	MKK1	0.854439				376.333	160.815	-28	MKK1	0.570271
KIN4	519.333	83.0321		309.667	99.6009	-209.667	KIN4	-0.766527				320.333	112.838	-199	KIN4	-0.935567
SWE1	447	53.8424		319.333	128.741	-127.667	SWE1	0.102226				328	105.532	-119	SWE1	-0.231081
TPK1	499.667	7.23418		346.333	113.271	-153.333	TPK1	-0.169701				405.667	135.581	-94	TPK1	-0.0109295
STE20	505.667	66.6433		349	153.307	-156.667	STE20	-0.205016				384.667	148.971	-121	STE20	-0.248694
RCK2	406.333	35.473		179.333	110.821	-227	RCK2	-0.950166				411.333	183.957	5	RCK2	0.860872
SSN3	311.333	29.023		206.667	9.29157	-104.667	SSN3	0.345901				193.333	42.004	-118	SSN3	-0.222275
PHO85	250	43.0929		145	53.0283	-105	PHO85	0.342369				219.333	129.77	-30.6667	PHO85	0.546788
SKS1	420	33.0606		193	51.9711	-227	SKS1	-0.950166				228.667	75.3813	-191.333	SKS1	-0.868054
ISR1	437.333	4.72582		347.667	26.1598	-89.6667	ISR1	0.504819				348.333	123.208	-89	ISR1	0.0331008
DBF20	247	54.1479		335.667	98.0935	88.6667	DBF20	2.39418				315	121.791	68	DBF20	1.41565
KIN82	504.333	48.645		157.333	46.3609	-347	KIN82	-2.22151				365	86.2612	-139.333	KIN82	-0.410138
FUS3	379.667	75.9759		79.6667	52.2909	-300	FUS3	-1.72357				303.333	58.3895	-76.3333	FUS3	0.144644
TEL1	495	23.2594		150.333	82.9719	-344.667	TEL1	-2.19679				409	116.228	-86	TEL1	0.0595191
YGL059W	485.333	10.0167		384.667	165.198	-100.667	YGL059W	0.388279				326	101.887	-159.333	YGL059W	-0.58626
NPR1	484	25.9808		370	98.6053	-114	NPR1	0.247018				351.667	113.2	-132.333	NPR1	-0.348496
YCK2	471	26.0576		368	158.88	-103	YCK2	0.363558				399.667	202.411	-71.3333	YCK2	0.188675
PTK1	536	35.6791		326	123.479	-210	PTK1	-0.770058				365.667	158.51	-170.333	PTK1	-0.683127
VHS1	205.333	55.1392		194.667	100.724	-10.6667	VHS1	1.34179				348.667	128.399	143.333	VHS1	2.07905
GCN2	471	45.4313		257.667	88.0076	-213.333	GCN2	-0.805374				182.667	112.322	-288.333	GCN2	-1.72224
CKA1	389.333	16.0728		282	45.1774	-107.333	CKA1	0.317649				325.667	86.3964	-63.6667	CKA1	0.256188
CMK1	460	42.9302		322.333	51.0523	-137.667	CMK1	-0.00371936				377.333	126.243	-82.6667	CMK1	0.0888726
PKH2	598.667	205.023		374	76.6094	-224.667	PKH2	-0.925445				414	143.429	-184.667	PKH2	-0.809347
SKM1	267.667	231.833		226	63.2139	-41.6667	SKM1	1.01336				289.333	122.329	21.6667	SKM1	1.00764
YGK3	440	43.8634		360	40.8534	-80	YGK3	0.607233				392.667	142.423	-47.3333	YGK3	0.400021
CMK2	537.667	44.1626		383.667	72.7072	-154	CMK2	-0.176764				379	167.248	-158.667	CMK2	-0.580389
CTK3	38	10.8167		17	11.5326	-21	CTK3	1.23231				323	105.887	285	CTK3	3.32657
SMK1	550.667	19.6299		190.333	75.0489	-360.333	SMK1	-2.36277				231.333	94.0549	-319.333	SMK1	-1.99523
IME2	500.333	41.9325		333	97.6883	-167.333	IME2	-0.318024				313.333	180.473	-187	IME2	-0.829894
BCK1	545.333	43.0155		332	73.8986	-213.333	BCK1	-0.805374				387	217.419	-158.333	BCK1	-0.577454
BUB1	297.333	29.9054		248	91.0165	-49.3333	BUB1	0.932132				214	104.848	-83.3333	BUB1	0.0830019
PRR2	389	46.3573		136.667	71.0023	-252.333	PRR2	-1.21856				334.333	151.342	-54.6667	PRR2	0.335443
CHK1	468.333	25.5799		364	89.5377	-104.333	CHK1	0.349432				173.333	60.4676	-295	CHK1	-1.78095
CTK2	479.333	27.5379		314	83.5165	-165.333	CTK2	-0.296835				349	125.599	-130.333	CTK2	-0.330884
PTK2	508.333	68.2959		409	66.053	-99.3333	PTK2	0.402405				372.333	141.175	-136	PTK2	-0.380785
DUN1	463.333	69.9595		91	37.51	-372.333	DUN1	-2.48991				187.667	86.9502	-275.667	DUN1	-1.6107
STE7	556.667	45.0925		522.333	146.712	-34.3333	STE7	1.09105				442	198.547	-114.667	STE7	-0.192922
YBR028C	552	15.5242		428.333	182.84	-123.667	YBR028C	0.144604				357.333	172.631	-194.667	YBR028C	-0.897408
AKL1	571.667	28.5015		380.333	140.692	-191.333	AKL1	-0.572293				352.667	178.702	-219	AKL1	-1.11169
ARK1	493.667	29.2973		357	75.4453	-136.667	ARK1	0.00687519				394.667	157.068	-99	ARK1	-0.0549599
SSK2	574	41.6773		361	134.324	-213	SSK2	-0.801842				410.333	156.235	-163.667	SSK2	-0.624419
YNR047W	446.667	113.931		284.667	52.5484	-162	YNR047W	-0.26152				402.333	182.506	-44.3333	YNR047W	0.426439
KSS1	341.667	48.4286		262.667	61.0928	-79	KSS1	0.617827				329.333	118.158	-12.3333	KSS1	0.708233
DBF2	518.333	34.0783		293.333	133.949	-225	DBF2	-0.928977				358.667	220.774	-159.667	DBF2	-0.589195
YAK1	512	15.8745		345.333	114.146	-166.667	YAK1	-0.310961				382.667	179.845	-129.333	YAK1	-0.322077
HAL5	255.333	57.5007		68	63.9766	-187.333	HAL5	-0.529915				100.667	90.0019	-154.667	HAL5	-0.545165
CTK1	75.3333	64.7019		131.333	77.3714	56	CTK1	2.04809				113	98.4226	37.6667	CTK1	1.14854
SSK22	488.333	24.5832		356.333	72.3418	-132	SSK22	0.0563164				395.333	141.139	-93	SSK22	-0.00212345
RIM11	268.667	58.3467		355.333	94.4951	86.6667	RIM11	2.37299				367.667	105.794	99	RIM11	1.68864
HRK1	481.333	20.0333		313.667	105.434	-167.667	HRK1	-0.321556				340	132.525	-141.333	HRK1	-0.42775
PBS2	3.66667	3.51188		3.66667	4.72582	0	PBS2	1.4548				30.6667	24.8462	27	PBS2	1.05461
MLP1	598.667	106.369		377	127.008	-221.667	MLP1	-0.893661				403.333	171.739	-195.333	MLP1	-0.903278
YPK2	615	45.6399		480.667	156.848	-134.333	YPK2	0.0315958				426.667	176.693	-188.333	YPK2	-0.841636
YDL025C	525.667	71.8076		350	135.547	-175.667	YDL025C	-0.406312				480.667	196.749	-45	YDL025C	0.420568
MRK1	462.333	55.9404		299	56.3205	-163.333	MRK1	-0.275646				354.667	145.225	-107.667	MRK1	-0.131279
PKH3	500.667	63.6894		378.667	143.514	-122	PKH3	0.162262				409	157.801	-91.6667	PKH3	0.00961798
PKH1	462.333	96.0278		287.333	92.8027	-175	PKH1	-0.399249				402.667	115.889	-59.6667	PKH1	0.291412
GIN4	418.333	11.5902		401	96.1613	-17.3333	GIN4	1.27116				431.333	126.824	13	GIN4	0.93132
SPS1	440	31.749		311	113.221	-129	SPS1	0.0881001				373	65.643	-67	SPS1	0.226834
RCK1	518.667	37.2066		400.667	48.2321	-118	RCK1	0.20464				418	206.995	-100.667	RCK1	-0.0696367
TOS3	588.333	60.8714		318.667	118.395	-269.667	TOS3	-1.4022				321	120.553	-267.333	TOS3	-1.53732
ATG1	515.333	39.5517		318	132.378	-197.333	ATG1	-0.635861				388	194.672	-127.333	ATG1	-0.304465
YCK3	284	30.315		143.333	124.134	-140.667	YCK3	-0.035503	Mean Size change	Std Dev		165	144.503	-119	YCK3	-0.231081	Mean Size change	Std Dev
									-54.853	90.8992							-45.0362	69.2449
STE11	471.667	92.6841		408	106.944	-63.6667	STE11	-0.0969604				378	52.4309	-93.6667	STE11	-0.702296
RIM15	377.667	65.1178		298	132.284	-79.6667	RIM15	-0.27298				281.333	32.7159	-96.3333	RIM15	-0.740807
VPS15	79.3333	69.5797		69.3333	62.9788	-10	VPS15	0.493437				69.3333	67.5747	-10	VPS15	0.505976
BUD32	94.6667	82.203		81.6667	72.0023	-13	BUD32	0.460434				110.667	95.9236	16	BUD32	0.881454
GIP4	390.667	161.339		350.667	128.811	-40	GIP4	0.163401				313	101.336	-77.6667	GIP4	-0.471232
SPO7	417.667	60.0528		429.667	131.348	12	SPO7	0.735464				178.333	38.2797	-239.333	SPO7	-2.80594
PSR1	375	91.0604		374	141.715	-1	PSR1	0.592448				371	163.184	-4	PSR1	0.592624
PSR2	396.667	46.6083		74	66.8431	-322.667	PSR2	-2.94627				331.667	77.7453	-65	PSR2	-0.288307
CMP2	316	35.3695		188.333	80.0021	-127.667	CMP2	-0.801037				245.333	90.9414	-70.6667	CMP2	-0.370142
PPZ1	499.667	79.1096		466.333	118.837	-33.3333	PPZ1	0.236743				439	166.88	-60.6667	PPZ1	-0.225727
MIH1	363.667	83.6441		210.667	35.6417	-153	MIH1	-1.07973				381.333	124.857	17.6667	MIH1	0.905524
ZDS1	450.333	150.474		418.667	133.886	-31.6667	ZDS1	0.255078				408.667	143.001	-41.6667	ZDS1	0.0486616
RTS1	327	64.8614		378.333	106.402	51.3333	RTS1	1.16818				78.3333	42.3596	-248.667	RTS1	-2.94073
PTC5	412.333	61.5332		349.333	136.647	-63	PTC5	-0.0896263				350.333	176.421	-62	PTC5	-0.244982
PPQ1	411	96.1613		428.667	191.126	17.6667	PPQ1	0.797804				344.667	64.1275	-66.3333	PPQ1	-0.307562
RRD2	332	107.629		243.333	23.5867	-88.6667	RRD2	-0.37199				281.333	73.4189	-50.6667	RRD2	-0.0813119
PPH3	369.333	37.6342		285.667	45.3578	-83.6667	PPH3	-0.316984				333	96.5971	-36.3333	PPH3	0.125683
PPM1	411	72.0833		218.667	158.79	-192.333	PPM1	-1.51245				305.667	83.4286	-105.333	PPM1	-0.87078
PPZ2	402.333	105.078		400.333	64.0338	-2	PPZ2	0.581447				351.333	92.1159	-51	PPZ2	-0.0861257
GIP2	402.667	87.7515		218.667	56.8008	-184	GIP2	-1.42077				221	4.58258	-181.667	GIP2	-1.97315
PTP3	343.667	83.5843		414.667	173.047	71	PTP3	1.38453				343.333	226.144	-0.333333	PTP3	0.645577
PPT1	433.333	102.666		344	138.698	-89.3333	PPT1	-0.379325				401	158.465	-32.3333	PPT1	0.183449
RTS3	404	103.533		344.333	132.447	-59.6667	RTS3	-0.0529556				369.667	182.138	-34.3333	RTS3	0.154566
PTC7	408.667	105.557		378.667	134.247	-30	PTC7	0.273413				353	120.403	-55.6667	PTC7	-0.153519
CNB1	240	32.4191		185.667	76.4221	-54.3333	CNB1	0.00571747				131	95.8488	-109	CNB1	-0.923732
GAC1	414.667	53.6687		249	120.516	-165.667	GAC1	-1.21908				309.333	86.0078	-105.333	GAC1	-0.87078
PTP2	332	44.911		350.333	63.0106	18.3333	PTP2	0.805138				163	24	-169	PTP2	-1.79022
PIG1	380.333	51.6269		259.333	88.2175	-121	PIG1	-0.727696				132	68.1689	-248.333	PIG1	-2.93591
SAP4	367	83.5225		263.333	81.2794	-103.667	SAP4	-0.537008				188.667	51.0816	-178.333	SAP4	-1.92501
SAP155	206	17.7764		180.667	24.7857	-25.3333	SAP155	0.324752				163	48.5901	-43	SAP155	0.0294062
PSY4	161.667	34.356		215.667	79.425	54	PSY4	1.19751				185	30.5123	23.3333	PSY4	0.987359
PTC3	379	74.3572		178	58.66	-201	PTC3	-1.60779				348	187.481	-31	PTC3	0.202704
BNI4	402.667	76.0351		387.667	153.393	-15	BNI4	0.438431				320	166.709	-82.6667	BNI4	-0.54344
PSY2	367.667	113.65		262	104.173	-105.667	PSY2	-0.559011				300	81.6149	-67.6667	PSY2	-0.326817
PAM1	414	122.425		324	68.0221	-90	PAM1	-0.386659				353	110.313	-61	PAM1	-0.230541
PIG2	481	166.277		383.667	86.1994	-97.3333	PIG2	-0.467334				462	203.536	-19	PIG2	0.376002
YVH1	288.667	139.145		303	128.573	14.3333	YVH1	0.761133				275	155.907	-13.6667	YVH1	0.453023
SIS2	267	29.8664		256.667	52.9748	-10.3333	SIS2	0.48977				251.667	35.2326	-15.3333	SIS2	0.428954
GLC8	430	81.431		373	123.988	-57	GLC8	-0.0236191				409.667	143.723	-20.3333	GLC8	0.356747
ZDS2	392	17.4356		300.333	49.813	-91.6667	ZDS2	-0.404994				388.333	66.2898	-3.66667	ZDS2	0.597438
TIP41	322	81.9024		315.667	56.3235	-6.33333	TIP41	0.533775				397	112.743	75	TIP41	1.7335
LTP1	252	27		320	118.579	68	LTP1	1.35153				369.667	134.076	117.667	LTP1	2.34967
SAP185	439.667	17.9536		463	62.9841	23.3333	SAP185	0.860144				372.667	93.0287	-67	SAP185	-0.31719
YMR1	362.667	55.7704		212	98.2904	-150.667	YMR1	-1.05406				306	110.977	-56.6667	YMR1	-0.167961
NEM1	484	104.747		215.333	82.5853	-268.667	NEM1	-2.35221				385.333	122.659	-98.6667	NEM1	-0.774504
CNA1	351.667	71.8424		182	89.5377	-169.667	CNA1	-1.26309				393.333	131.02	41.6667	CNA1	1.25212
PTP1	387.667	85.4069		320.667	83.0803	-67	PTP1	-0.133631				428.333	153.279	40.6667	PTP1	1.23768
PHO13	365.333	91.5278		375.667	118.93	10.3333	PHO13	0.717128				307.667	85.9205	-57.6667	PHO13	-0.182402
REG1	465.667	148.857		336.333	201.649	-129.333	REG1	-0.819373				391	178.72	-74.6667	REG1	-0.427908
PTC6	118.667	64.1431		135.667	68.0612	17	PTC6	0.79047				124.333	16.2583	5.66667	PTC6	0.732226
PPH21	351	40.4475		254.333	81.1316	-96.6667	PPH21	-0.46				264	17.6918	-87	PPH21	-0.606019
PPH22	381.333	74.7819		382.333	51.0131	1	PPH22	0.614451				158.333	64.0651	-223	PPH22	-2.57006
GIP1	355.333	82.5187		396.333	130.619	41	GIP1	1.0545				344.333	75.5932	-11	GIP1	0.491534
REG2	388.333	99.2891		389	102.718	0.666667	REG2	0.610784				369	94.6942	-19.3333	REG2	0.371188
YBR051W	384.333	60.7069		386.333	77.9829	2	YBR051W	0.625452				423.667	80.2579	39.3333	YBR051W	1.21842
SIW14	316.667	35.2326		338	79.7935	21.3333	SIW14	0.838142				259.667	113.068	-57	SIW14	-0.172775
PPG1	322.333	63.0026		315.333	99.9016	-7	PPG1	0.526441				346	142.717	23.6667	PPG1	0.992172
TEP1	329.333	63.2166		391.667	85.9787	62.3333	TEP1	1.28919				412.333	170.951	83	TEP1	1.84903
SDP1	378	130.104		159	19.9249	-219	SDP1	-1.80581				291.333	73.1596	-86.6667	SDP1	-0.601206
RRD1	471.333	133.815		325	124.435	-146.333	RRD1	-1.00639				409	160.521	-62.3333	RRD1	-0.249796
OCA1	337.667	55.1936		304.333	81.1316	-33.3333	OCA1	0.236743				358.333	165.965	20.6667	OCA1	0.948848
SAP190	381	74.0203		256	80.5419	-125	SAP190	-0.771701				371.333	65.4319	-9.66667	SAP190	0.510789
PTC4	406.333	94.5216		148	60.3573	-258.333	PTC4	-2.23853				448.667	225.42	42.3333	PTC4	1.26175
PPS1	417.333	98.1903		367	84.3267	-50.3333	PPS1	0.0497223				371.333	81.8189	-46	PPS1	-0.0139183
DCR2	368.667	121.377		379.667	81.4269	11	DCR2	0.724463				225.667	49.7226	-143	DCR2	-1.41474
GIP3	517.667	131.622		222.667	89.4893	-295	GIP3	-2.6419				517.333	192.18	-0.333333	GIP3	0.645577
YSW1	397	58.643		323	120.516	-74	YSW1	-0.210639				366.667	104.165	-30.3333	YSW1	0.212332
PTC1	197.333	105.973		135.667	73.5686	-61.6667	PTC1	-0.074958				143	69.1954	-54.3333	PTC1	-0.134264
PHO8	372.667	44.0606		228.333	47.606	-144.333	PHO8	-0.984391				355.333	119.09	-17.3333	PHO8	0.400071
YER134C	297	111.665		391.667	115.613	94.6667	YER134C	1.6449				325	84.1249	28	YER134C	1.05475
SIT4	229.333	45.4569		444.667	27.6104	215.333	SIT4	2.97237				300.667	59.4671	71.3333	SIT4	1.68055
PTC2	378.333	88.7149		389.333	125.548	11	PTC2	0.724463				358	87.892	-20.3333	PTC2	0.356747
MSG5	403.667	54.3722		263.667	91.5715	-140	MSG5	-0.936719				409	156.522	5.33333	MSG5	0.727412
TPD3	214.333	11.9304		152.333	87.1168	-62	TPD3	-0.0786251				164.667	62.6445	-49.6667	TPD3	-0.0668704
ALK1	246.333	41.4287		293	93.0376	46.6667	ALK1	1.11684				292.333	31.4696	46	ALK1	1.3147
ALK2	441.333	92.0453		385.667	89.0749	-55.6667	ALK2	-0.0089508				342	59.1946	-99.3333	ALK2	-0.784131
CKB1	241.333	16.2583		226.333	44.1173	-15	CKB1	0.438431				198.667	59.3661	-42.6667	CKB1	0.0342201
CKB2	356	119.787		293.333	113.778	-62.6667	CKB2	-0.0859592				316.333	122.075	-39.6667	CKB2	0.0775445
CLG1	302.333	64.3765		283	111.45	-19.3333	CLG1	0.39076				307	51.9711	4.66667	CLG1	0.717784
FMP48	438.333	145.26		435.667	112.269	-2.66667	FMP48	0.574113				345.333	88.7938	-93	FMP48	-0.692668
GAL83	347.667	81.1316		337.333	124.949	-10.3333	GAL83	0.48977				390.333	96.5729	42.6667	GAL83	1.26656
IKS1	500	80.3181		355.667	103.982	-144.333	IKS1	-0.984391				442.333	134.552	-57.6667	IKS1	-0.182402
KDX1	421	86.5332		396	157.439	-25	KDX1	0.328419				449.333	166.734	28.3333	KDX1	1.05957
PKP1	472	163.254		394.333	162.482	-77.6667	PKP1	-0.250977				393.333	105.249	-78.6667	PKP1	-0.485674
PRK1	68.6667	28.8848		206	107.037	137.333	PRK1	2.11428				54	43.5775	-14.6667	PRK1	0.438582
RTR1	522.667	102.666		470.667	82.7184	-52	RTR1	0.0313869				444.333	78.8057	-78.3333	RTR1	-0.48086
SAK1	397.667	93.5218		353.333	113.006	-44.3333	SAK1	0.115729				369.333	109.473	-28.3333	SAK1	0.241215
SIP1	405	83.0723		310.667	119.006	-94.3333	SIP1	-0.434331				320.667	55.5368	-84.3333	SIP1	-0.567509
SIP2	473.333	111.393		306.667	116.586	-166.667	SIP2	-1.23008				350.333	95.3642	-123	SIP2	-1.12591
SNF4	309.333	25.3837		335	59.808	25.6667	SNF4	0.885814				289.667	31.39	-19.6667	SNF4	0.366374
YCH1	437.333	78.0085		352.333	107.337	-85	YCH1	-0.331653				404.333	89.5842	-33	YCH1	0.173821
TOR1	483.667	107.151		443.667	122.663	-40	TOR1	0.163401				482.667	147.886	-1	TOR1	0.635949
SNF1	208.333	26.1024		285.667	66.3652	77.3333	SNF1	1.45421				250	41.5812	41.6667	SNF1	1.25212

## Sheet: 0.8M NaCl - 426-Vector
	Transformed with: _426-vector			Colony Size	Mean Colony Size	Standard Deviation	Z Score					Colony Size	Mean Colony Size	Standard Deviation	Z Score			Transformed with: _426-vector			Colony Size	Mean Colony Size	Standard Deviation	Z Score					Colony Size	Mean Colony Size	Standard Deviation	Z Score			Transformed with: _426-vector			Colony Size	Mean Colony Size	Standard Deviation	Z Score					Colony Size	Mean Colony Size	Standard Deviation	Z Score
Replicate 1	Standard Name	KinDel PLATE #	location (KinDel)	ENTER DATA BELOW	423.532	138.858			Standard Name	KinDel PLATE #	location (KinDel)	ENTER DATA BELOW	282.785	80.6614			Replicate 2	Standard Name	KinDel PLATE #	location (KinDel)	ENTER DATA BELOW	399.84	146.348			Standard Name	KinDel PLATE #	location (KinDel)	ENTER DATA BELOW	393.946	113.907			Replicate 3	Standard Name	KinDel PLATE #	location (KinDel)	ENTER DATA BELOW	439.266	133.114			Standard Name	KinDel PLATE #	location (KinDel)	ENTER DATA BELOW	408.172	114.591
	PSK1	1	A1	548			0.896367		STE11	2	A1	408			1.55235			PSK1	1	A1	468			0.465738		STE11	2	A1	429			0.307739			PSK1	1	A1	433			-0.0470723		STE11	2	A1	578			1.48204
	KIN3	1	A2	425			0.0105725		RIM15	2	A2	308			0.312604			KIN3	1	A2	352			-0.326896		RIM15	2	A2	388			-0.0522024			KIN3	1	A2	345			-0.708162		RIM15	2	A2	437			0.251573
	KNS1	1	A3	393			-0.219878		VPS15	2	A3	0			-3.50583			KNS1	1	A3	349			-0.347395		VPS15	2	A3	108			-2.51034			KNS1	1	A3	359			-0.602989		VPS15	2	A3	130			-2.42753
	KIN2	1	A4	194			-1.65299		BUD32	2	A4	0			-3.50583			KIN2	1	A4	154			-1.67984		BUD32	2	A4	148			-2.15918			KIN2	1	A4	216			-1.67726		BUD32	2	A4	136			-2.37517
	HOG1	1	A5	381			-0.306297		GIP4	2	A5	263			-0.245284			HOG1	1	A5	388			-0.0809062		GIP4	2	A5	337			-0.499935			HOG1	1	A5	404			-0.264931		GIP4	2	A5	572			1.42968
	SKY1	1	A6	603			1.29245		SPO7	2	A6	367			1.04406			SKY1	1	A6	612			1.4497		SPO7	2	A6	402			0.0707045			SKY1	1	A6	577			1.03471		SPO7	2	A6	484			0.661729
	YMR291W	1	A7	509			0.615505		PSR1	2	A7	277			-0.0717189			YMR291W	1	A7	474			0.506736		PSR1	2	A7	457			0.553553			YMR291W	1	A7	558			0.891976		PSR1	2	A7	391			-0.149856
	MCK1	1	A8	0			-3.0501		PSR2	2	A8	357			0.920082			MCK1	1	A8	2			-2.71846		PSR2	2	A8	448			0.474542			MCK1	1	A8	1			-3.29242		PSR2	2	A8	385			-0.202216
	CLA4	1	A9	171			-1.81863		CMP2	2	A9	277			-0.0717189			CLA4	1	A9	195			-1.39968		CMP2	2	A9	325			-0.605284			CLA4	1	A9	180			-1.94771		CMP2	2	A9	346			-0.542558
	CKA2	1	A10	533			0.788343		PPZ1	2	A10	413			1.61434			CKA2	1	A10	509			0.745893		PPZ1	2	A10	568			1.52803			CKA2	1	A10	499			0.448745		PPZ1	2	A10	518			0.958437
	MEK1	1	A11	488			0.464272		MIH1	2	A11	268			-0.183296			MEK1	1	A11	540			0.957717		MIH1	2	A11	400			0.0531464			MEK1	1	A11	428			-0.0846342		MIH1	2	A11	423			0.129399
	PSK2	1	A12	527			0.745133		ZDS1	2	A12	284			0.0150636			PSK2	1	A12	569			1.15588		ZDS1	2	A12	490			0.843262			PSK2	1	A12	478			0.290985		ZDS1	2	A12	577			1.47331
	YPL236C	1	B1	464			0.291434		RTS1	2	B1	254			-0.356862			YPL236C	1	B1	376			-0.162903		RTS1	2	B1	349			-0.394586			YPL236C	1	B1	390			-0.370105		RTS1	2	B1	378			-0.263303
	TPK2	1	B2	401			-0.162265		PTC5	2	B2	356			0.907684			TPK2	1	B2	428			0.192416		PTC5	2	B2	403			0.0794836			TPK2	1	B2	418			-0.159758		PTC5	2	B2	478			0.609369
	YPL150W	1	B3	312			-0.803206		PPQ1	2	B3	353			0.870492			YPL150W	1	B3	209			-1.30402		PPQ1	2	B3	358			-0.315574			YPL150W	1	B3	284			-1.16642		PPQ1	2	B3	522			0.993344
	YPL141C	1	B4	296			-0.918431		RRD2	2	B4	244			-0.480837			YPL141C	1	B4	190			-1.43385		RRD2	2	B4	300			-0.82476			YPL141C	1	B4	321			-0.888459		RRD2	2	B4	452			0.382474
	MKK2	1	B5	341			-0.59436		PPH3	2	B5	327			0.548156			MKK2	1	B5	332			-0.463557		PPH3	2	B5	399			0.0443673			MKK2	1	B5	484			0.336059		PPH3	2	B5	382			-0.228396
	KIN1	1	B6	434			0.0753867		PPM1	2	B6	341			0.721722			KIN1	1	B6	335			-0.443058		PPM1	2	B6	485			0.799367			KIN1	1	B6	385			-0.407667		PPM1	2	B6	407			-0.0102281
	SLT2	1	B7	386			-0.270289		PPZ2	2	B7	283			0.00266613			SLT2	1	B7	403			0.0215895		PPZ2	2	B7	443			0.430646			SLT2	1	B7	485			0.343572		PPZ2	2	B7	481			0.635549
	IRE1	1	B8	499			0.543489		GIP2	2	B8	302			0.238219			IRE1	1	B8	439			0.267579		GIP2	2	B8	463			0.606228			IRE1	1	B8	500			0.456258		GIP2	2	B8	443			0.303934
	KSP1	1	B9	212			-1.52336		PTP3	2	B9	258			-0.307272			KSP1	1	B9	157			-1.65934		PTP3	2	B9	348			-0.403365			KSP1	1	B9	264			-1.31667		PTP3	2	B9	425			0.146853
	YCK1	1	B10	428			0.0321773		PPT1	2	B10	353			0.870492			YCK1	1	B10	401			0.00792343		PPT1	2	B10	398			0.0355883			YCK1	1	B10	487			0.358597		PPT1	2	B10	549			1.22897
	KCC4	1	B11	546			0.881963		RTS3	2	B11	302			0.238219			KCC4	1	B11	494			0.643397		RTS3	2	B11	401			0.0619255			KCC4	1	B11	488			0.366109		RTS3	2	B11	509			0.879897
	SAT4	1	B12	163			-1.87624		PTC7	2	B12	319			0.448976			SAT4	1	B12	211			-1.29036		PTC7	2	B12	525			1.15053			SAT4	1	B12	241			-1.48945		PTC7	2	B12	382			-0.228396
	ELM1	1	C1	537			0.817149		CNB1	2	C1	205			-0.964339			ELM1	1	C1	469			0.472571		CNB1	2	C1	246			-1.29883			ELM1	1	C1	514			0.561431		CNB1	2	C1	269			-1.21451
	HSL1	1	C2	408			-0.111854		GAC1	2	C2	355			0.895287			HSL1	1	C2	320			-0.545554		GAC1	2	C2	459			0.571111			HSL1	1	C2	364			-0.565427		GAC1	2	C2	430			0.190486
	PRR1	1	C3	377			-0.335103		PTP2	2	C3	291			0.101846			PRR1	1	C3	307			-0.634383		PTP2	2	C3	380			-0.122435			PRR1	1	C3	315			-0.933534		PTP2	2	C3	325			-0.725819
	YPK1	1	C4	552			0.925173		PIG1	2	C4	321			0.473771			YPK1	1	C4	471			0.486237		PIG1	2	C4	405			0.0970417			YPK1	1	C4	608			1.2676		PIG1	2	C4	415			0.0595856
	TPK3	1	C5	502			0.565094		SAP4	2	C5	271			-0.146104			TPK3	1	C5	434			0.233414		SAP4	2	C5	407			0.1146			TPK3	1	C5	444			0.035564		SAP4	2	C5	423			0.129399
	KKQ8	1	C6	406			-0.126257		SAP155	2	C6	200			-1.02633			KKQ8	1	C6	468			0.465738		SAP155	2	C6	192			-1.7729			KKQ8	1	C6	443			0.0280516		SAP155	2	C6	226			-1.58976
	YKL171W	1	C7	432			0.0609836		PSY4	2	C7	122			-1.99333			YKL171W	1	C7	403			0.0215895		PSY4	2	C7	182			-1.86069			YKL171W	1	C7	403			-0.272444		PSY4	2	C7	181			-1.98247
	MKK1	1	C8	413			-0.0758464		PTC3	2	C8	294			0.139039			MKK1	1	C8	366			-0.231233		PTC3	2	C8	432			0.334077			MKK1	1	C8	434			-0.0395599		PTC3	2	C8	411			0.0246788
	KIN4	1	C9	501			0.557892		BNI4	2	C9	328			0.560554			KIN4	1	C9	610			1.43603		BNI4	2	C9	480			0.755472			KIN4	1	C9	447			0.0581011		BNI4	2	C9	400			-0.0713151
	SWE1	1	C10	454			0.219418		PSY2	2	C10	238			-0.555222			SWE1	1	C10	390			-0.0672401		PSY2	2	C10	450			0.4921			SWE1	1	C10	497			0.43372		PSY2	2	C10	415			0.0595856
	TPK1	1	C11	508			0.608303		PAM1	2	C11	308			0.312604			TPK1	1	C11	496			0.657063		PAM1	2	C11	386			-0.0697605			TPK1	1	C11	495			0.418696		PAM1	2	C11	548			1.22024
	STE20	1	C12	495			0.514683		PIG2	2	C12	289			0.0770512			STE20	1	C12	445			0.308578		PIG2	2	C12	577			1.60704			STE20	1	C12	577			1.03471		PIG2	2	C12	577			1.47331
	RCK2	1	D1	438			0.104193		YVH1	2	D1	146			-1.69579			RCK2	1	D1	368			-0.217567		YVH1	2	D1	424			0.263844			RCK2	1	D1	413			-0.19732		YVH1	2	D1	296			-0.978894
	SSN3	1	D2	305			-0.853617		SIS2	2	D2	301			0.225821			SSN3	1	D2	286			-0.777877		SIS2	2	D2	255			-1.21982			SSN3	1	D2	343			-0.723187		SIS2	2	D2	245			-1.42396
	PHO85	1	D3	267			-1.12728		GLC8	2	D3	339			0.696927			PHO85	1	D3	201			-1.35869		GLC8	2	D3	496			0.895937			PHO85	1	D3	282			-1.18144		GLC8	2	D3	455			0.408654
	SKS1	1	D4	413			-0.0758464		ZDS2	2	D4	372			1.10604			SKS1	1	D4	391			-0.0604071		ZDS2	2	D4	404			0.0882627			SKS1	1	D4	456			0.125713		ZDS2	2	D4	400			-0.0713151
	ISR1	1	D5	441			0.125798		TIP41	2	D5	228			-0.679197			ISR1	1	D5	439			0.267579		TIP41	2	D5	378			-0.139993			ISR1	1	D5	432			-0.0545847		TIP41	2	D5	360			-0.420384
	DBF20	1	D6	223			-1.44415		LTP1	2	D6	225			-0.716389			DBF20	1	D6	209			-1.30402		LTP1	2	D6	252			-1.24616			DBF20	1	D6	309			-0.978608		LTP1	2	D6	279			-1.12725
	KIN82	1	D7	470			0.334644		SAP185	2	D7	433			1.86229			KIN82	1	D7	560			1.09438		SAP185	2	D7	460			0.57989			KIN82	1	D7	483			0.328547		SAP185	2	D7	426			0.15558
	FUS3	1	D8	350			-0.529546		YMR1	2	D8	304			0.263014			FUS3	1	D8	323			-0.525054		YMR1	2	D8	369			-0.219005			FUS3	1	D8	466			0.200836		YMR1	2	D8	415			0.0595856
	TEL1	1	D9	474			0.36345		NEM1	2	D9	366			1.03166			TEL1	1	D9	491			0.622898		NEM1	2	D9	520			1.10663			TEL1	1	D9	520			0.606505		NEM1	2	D9	566			1.37732
	YGL059W	1	D10	495			0.514683		CNA1	2	D10	269			-0.170899			YGL059W	1	D10	475			0.513569		CNA1	2	D10	399			0.0443673			YGL059W	1	D10	486			0.351084		CNA1	2	D10	387			-0.184762
	NPR1	1	D11	469			0.327442		PTP1	2	D11	296			0.163834			NPR1	1	D11	469			0.472571		PTP1	2	D11	402			0.0707045			NPR1	1	D11	514			0.561431		PTP1	2	D11	465			0.495921
	YCK2	1	D12	501			0.557892		PHO13	2	D12	264			-0.232887			YCK2	1	D12	458			0.397407		PHO13	2	D12	390			-0.0346443			YCK2	1	D12	454			0.110688		PHO13	2	D12	442			0.295207
	PTK1	1	E1	553			0.932375		REG1	2	E1	294			0.139039			PTK1	1	E1	495			0.65023		REG1	2	E1	559			1.44902			PTK1	1	E1	560			0.907001		REG1	2	E1	544			1.18533
	VHS1	1	E2	255			-1.2137		PTC6	2	E2	91			-2.37766			VHS1	1	E2	146			-1.7345		PTC6	2	E2	73			-2.81761			VHS1	1	E2	215			-1.68477		PTC6	2	E2	192			-1.88647
	GCN2	1	E3	451			0.197814		PPH21	2	E3	305			0.275411			GCN2	1	E3	523			0.841556		PPH21	2	E3	367			-0.236563			GCN2	1	E3	439			-0.00199797		PPH21	2	E3	381			-0.237123
	CKA1	1	E4	401			-0.162265		PPH22	2	E4	295			0.151436			CKA1	1	E4	371			-0.197068		PPH22	2	E4	426			0.281402			CKA1	1	E4	396			-0.325031		PPH22	2	E4	423			0.129399
	CMK1	1	E5	411			-0.0902496		GIP1	2	E5	268			-0.183296			CMK1	1	E5	478			0.534068		GIP1	2	E5	366			-0.245342			CMK1	1	E5	491			0.388646		GIP1	2	E5	432			0.20794
	PKH2	1	E6	823			2.8768		REG2	2	E6	280			-0.0345264			PKH2	1	E6	421			0.144584		REG2	2	E6	410			0.140937			PKH2	1	E6	552			0.846902		REG2	2	E6	475			0.583189
	SKM1	1	E7	405			-0.133459		YBR051W	2	E7	319			0.448976			SKM1	1	E7	0			-2.73213		YBR051W	2	E7	439			0.39553			SKM1	1	E7	398			-0.310006		YBR051W	2	E7	395			-0.114949
	YGK3	1	E8	390			-0.241483		SIW14	2	E8	336			0.659734			YGK3	1	E8	472			0.49307		SIW14	2	E8	276			-1.03546			YGK3	1	E8	458			0.140737		SIW14	2	E8	338			-0.612372
	CMK2	1	E9	568			1.0404		PPG1	2	E9	259			-0.294874			CMK2	1	E9	487			0.595566		PPG1	2	E9	385			-0.0785396			CMK2	1	E9	558			0.891976		PPG1	2	E9	323			-0.743272
	CTK3	1	E10	35			-2.79804		TEP1	2	E10	287			0.0522562			CTK3	1	E10	29			-2.53397		TEP1	2	E10	402			0.0707045			CTK3	1	E10	50			-2.92432		TEP1	2	E10	299			-0.952713
	SMK1	1	E11	528			0.752335		SDP1	2	E11	251			-0.394054			SMK1	1	E11	562			1.10804		SDP1	2	E11	511			1.02762			SMK1	1	E11	562			0.922025		SDP1	2	E11	372			-0.315663
	IME2	1	E12	527			0.745133		RRD1	2	E12	317			0.424181			IME2	1	E12	452			0.356409		RRD1	2	E12	542			1.29977			IME2	1	E12	522			0.62153		RRD1	2	E12	555			1.28133
	BCK1	1	F1	595			1.23484		OCA1	2	F1	367			1.04406			BCK1	1	F1	520			0.821056		OCA1	2	F1	274			-1.05302			BCK1	1	F1	521			0.614018		OCA1	2	F1	372			-0.315663
	BUB1	1	F2	303			-0.86802		SAP190	2	F2	306			0.287809			BUB1	1	F2	265			-0.921371		SAP190	2	F2	383			-0.0960977			BUB1	1	F2	324			-0.865922		SAP190	2	F2	454			0.399928
	PRR2	1	F3	337			-0.623166		PTC4	2	F3	298			0.188629			PRR2	1	F3	426			0.17875		PTC4	2	F3	472			0.685239			PRR2	1	F3	404			-0.264931		PTC4	2	F3	449			0.356294
	CHK1	1	F4	486			0.449869		PPS1	2	F4	308			0.312604			CHK1	1	F4	439			0.267579		PPS1	2	F4	446			0.456983			CHK1	1	F4	480			0.30601		PPS1	2	F4	498			0.783903
	CTK2	1	F5	466			0.305837		DCR2	2	F5	235			-0.592414			CTK2	1	F5	461			0.417906		DCR2	2	F5	399			0.0443673			CTK2	1	F5	511			0.538894		DCR2	2	F5	472			0.557008
	PTK2	1	F6	501			0.557892		GIP3	2	F6	366			1.03166			PTK2	1	F6	580			1.23104		GIP3	2	F6	602			1.82652			PTK2	1	F6	444			0.035564		GIP3	2	F6	585			1.54313
	DUN1	1	F7	450			0.190612		YSW1	2	F7	330			0.585349			DUN1	1	F7	401			0.00792343		YSW1	2	F7	422			0.246286			DUN1	1	F7	539			0.749241		YSW1	2	F7	439			0.269027
	STE7	1	F8	560			0.982786		PTC1	2	F8	75			-2.57602			STE7	1	F8	510			0.752726		PTC1	2	F8	261			-1.16714			STE7	1	F8	600			1.2075		PTC1	2	F8	256			-1.32796
	YBR028C	1	F9	536			0.809948		PHO8	2	F9	370			1.08125			YBR028C	1	F9	567			1.14221		PHO8	2	F9	418			0.21117			YBR028C	1	F9	553			0.854414		PHO8	2	F9	330			-0.682185
	AKL1	1	F10	600			1.27085		YER134C	2	F10	174			-1.34866			AKL1	1	F10	572			1.17638		YER134C	2	F10	325			-0.605284			AKL1	1	F10	543			0.77929		YER134C	2	F10	392			-0.141129
	ARK1	1	F11	482			0.421062		SIT4	2	F11	177			-1.31147			ARK1	1	F11	527			0.868888		SIT4	2	F11	259			-1.1847			ARK1	1	F11	472			0.245911		SIT4	2	F11	252			-1.36287
	SSK2	1	F12	553			0.932375		PTC2	2	F12	277			-0.0717189			SSK2	1	F12	547			1.00555		PTC2	2	F12	442			0.421867			SSK2	1	F12	622			1.37277		PTC2	2	F12	416			0.0683124
	YNR047W	1	G1	483			0.428264		MSG5	2	G1	343			0.746517			YNR047W	1	G1	319			-0.552387		MSG5	2	G1	448			0.474542			YNR047W	1	G1	538			0.741728		MSG5	2	G1	420			0.103219
	KSS1	1	G2	321			-0.738392		TPD3	2	G2	224			-0.728787			KSS1	1	G2	307			-0.634383		TPD3	2	G2	218			-1.54464			KSS1	1	G2	397			-0.317518		TPD3	2	G2	201			-1.80793
	DBF2	1	G3	539			0.831552		ALK1	2	G3	226			-0.703992			DBF2	1	G3	479			0.540901		ALK1	2	G3	219			-1.53586			DBF2	1	G3	537			0.734216		ALK1	2	G3	294			-0.996347
	YAK1	1	G4	530			0.766738		ALK2	2	G4	351			0.845697			YAK1	1	G4	506			0.725394		ALK2	2	G4	438			0.386751			YAK1	1	G4	500			0.456258		ALK2	2	G4	535			1.10679
	HAL5	1	G5	189			-1.689		CKB1	2	G5	223			-0.741184			HAL5	1	G5	286			-0.777877		CKB1	2	G5	247			-1.29005			HAL5	1	G5	291			-1.11383		CKB1	2	G5	254			-1.34542
	CTK1	1	G6	61			-2.6108		CKB2	2	G6	219			-0.790774			CTK1	1	G6	19			-2.6023		CKB2	2	G6	408			0.123379			CTK1	1	G6	146			-2.20313		CKB2	2	G6	441			0.28648
	SSK22	1	G7	516			0.665916		CLG1	2	G7	228			-0.679197			SSK22	1	G7	469			0.472571		CLG1	2	G7	339			-0.482377			SSK22	1	G7	480			0.30601		CLG1	2	G7	340			-0.594918
	RIM11	1	G8	237			-1.34332		FMP48	2	G8	271			-0.146104			RIM11	1	G8	233			-1.14003		FMP48	2	G8	512			1.0364			RIM11	1	G8	336			-0.775774		FMP48	2	G8	532			1.08061
	HRK1	1	G9	504			0.579497		GAL83	2	G9	254			-0.356862			HRK1	1	G9	466			0.452072		GAL83	2	G9	393			-0.00830707			HRK1	1	G9	474			0.260936		GAL83	2	G9	396			-0.106222
	PBS2	1	G10	0			-3.0501		IKS1	2	G10	409			1.56475			PBS2	1	G10	4			-2.7048		IKS1	2	G10	561			1.46658			PBS2	1	G10	7			-3.24735		IKS1	2	G10	530			1.06316
	MLP1	1	G11	547			0.889165		KDX1	2	G11	325			0.523361			MLP1	1	G11	528			0.875721		KDX1	2	G11	493			0.8696			MLP1	1	G11	721			2.11649		KDX1	2	G11	445			0.321387
	YPK2	1	G12	578			1.11241		PKP1	2	G12	284			0.0150636			YPK2	1	G12	601			1.37453		PKP1	2	G12	578			1.61582			YPK2	1	G12	666			1.70331		PKP1	2	G12	554			1.2726
	YDL025C	1	H1	476			0.377853		PRK1	2	H1	102			-2.24128			YDL025C	1	H1	493			0.636564		PRK1	2	H1	53			-2.99319			YDL025C	1	H1	608			1.2676		PRK1	2	H1	51			-3.11694
	MRK1	1	H2	399			-0.176668		RTR1	2	H2	407			1.53996			MRK1	1	H2	505			0.718561		RTR1	2	H2	603			1.8353			MRK1	1	H2	483			0.328547		RTR1	2	H2	558			1.30751
	PKH3	1	H3	453			0.212217		SAK1	2	H3	295			0.151436			PKH3	1	H3	476			0.520402		SAK1	2	H3	420			0.228728			PKH3	1	H3	573			1.00466		SAK1	2	H3	478			0.609369
	PKH1	1	H4	401			-0.162265		SIP1	2	H4	310			0.337399			PKH1	1	H4	413			0.08992		SIP1	2	H4	464			0.615007			PKH1	1	H4	573			1.00466		SIP1	2	H4	441			0.28648
	GIN4	1	H5	405			-0.133459		SIP2	2	H5	345			0.771312			GIN4	1	H5	424			0.165084		SIP2	2	H5	530			1.19443			GIN4	1	H5	426			-0.099659		SIP2	2	H5	545			1.19406
	SPS1	1	H6	428			0.0321773		SNF4	2	H6	281			-0.0221289			SPS1	1	H6	416			0.110419		SNF4	2	H6	317			-0.675516			SPS1	1	H6	476			0.27596		SNF4	2	H6	330			-0.682185
	RCK1	1	H7	478			0.392256		YCH1	2	H7	348			0.808504			RCK1	1	H7	527			0.868888		YCH1	2	H7	472			0.685239			RCK1	1	H7	551			0.839389		YCH1	2	H7	492			0.731543
	TOS3	1	H8	519			0.687521		BLANK	2	H8	0						TOS3	1	H8	613			1.45653		BLANK	2	H8	0						TOS3	1	H8	633			1.4554		BLANK	2	H8	0
	ATG1	1	H9	528			0.752335		BLANK	2	H9	0						ATG1	1	H9	547			1.00555		BLANK	2	H9	0						ATG1	1	H9	471			0.238398		BLANK	2	H9	0
	YCK3	1	H10	319			-0.752795		TOR1	2	H10	361			0.969672			YCK3	1	H10	267			-0.907705		TOR1	2	H10	531			1.2032			YCK3	1	H10	266			-1.30164		TOR1	2	H10	559			1.31623
	BLANK	1	H11	0					SNF1	2	H11	229			-0.666799			BLANK	1	H11	0					SNF1	2	H11	217			-1.55342			BLANK	1	H11	0					SNF1	2	H11	179			-1.99992
	BLANK	1	H12	0					BLANK	2	H12	0						BLANK	1	H12	0					BLANK	2	H12	0						BLANK	1	H12	0					BLANK	2	H12	0

## Sheet: 0.8M NaCl - 426-Aly1
	Transformed with: _426-Aly1__			Colony Size	Mean Colony Size	Standard Deviation	Z Score					Colony Size	Mean Colony Size	Standard Deviation	Z Score			Transformed with: _426-Aly1__			Colony Size	Mean Colony Size	Standard Deviation	Z Score					Colony Size	Mean Colony Size	Standard Deviation	Z Score			Transformed with: _426-Aly1__			Colony Size	Mean Colony Size	Standard Deviation	Z Score					Colony Size	Mean Colony Size	Standard Deviation	Z Score
Replicate 1	Standard Name	KinDel PLATE #	location (KinDel)	ENTER DATA BELOW	188.213	88.7071			Standard Name	KinDel PLATE #	location (KinDel)	ENTER DATA BELOW	209.828	93.2643			Replicate 2	Standard Name	KinDel PLATE #	location (KinDel)	ENTER DATA BELOW	315.819	115.635			Standard Name	KinDel PLATE #	location (KinDel)	ENTER DATA BELOW	361.484	106.89			Replicate 3	Standard Name	KinDel PLATE #	location (KinDel)	ENTER DATA BELOW	346.66	122.266			Standard Name	KinDel PLATE #	location (KinDel)	ENTER DATA BELOW	349.032	115.866
	PSK1	1	A1	210			0.245609		STE11	2	A1	337			1.36357			PSK1	1	A1	366			0.43396		STE11	2	A1	531			1.58589			PSK1	1	A1	366			0.158184		STE11	2	A1	356			0.060136
	KIN3	1	A2	201			0.144151		RIM15	2	A2	171			-0.416322			KIN3	1	A2	301			-0.128155		RIM15	2	A2	435			0.687773			KIN3	1	A2	462			0.94336		RIM15	2	A2	288			-0.526747
	KNS1	1	A3	111			-0.870424		VPS15	2	A3	0			-2.24982			KNS1	1	A3	148			-1.45129		VPS15	2	A3	123			-2.23111			KNS1	1	A3	199			-1.2077		VPS15	2	A3	85			-2.27877
	KIN2	1	A4	5			-2.06537		BUD32	2	A4	0			-2.24982			KIN2	1	A4	167			-1.28697		BUD32	2	A4	109			-2.36209			KIN2	1	A4	136			-1.72297		BUD32	2	A4	136			-1.8386
	HOG1	1	A5	213			0.279428		GIP4	2	A5	217			0.0769002			HOG1	1	A5	290			-0.223282		GIP4	2	A5	474			1.05263			HOG1	1	A5	324			-0.185331		GIP4	2	A5	361			0.103289
	SKY1	1	A6	127			-0.690055		SPO7	2	A6	278			0.730955			SKY1	1	A6	244			-0.621086		SPO7	2	A6	506			1.35201			SKY1	1	A6	310			-0.299836		SPO7	2	A6	505			1.3461
	YMR291W	1	A7	297			1.22636		PSR1	2	A7	211			0.0125669			YMR291W	1	A7	390			0.641509		PSR1	2	A7	468			0.996501			YMR291W	1	A7	458			0.910644		PSR1	2	A7	443			0.811001
	MCK1	1	A8	28			-1.80609		PSR2	2	A8	0			-2.24982			MCK1	1	A8	45			-2.34202		PSR2	2	A8	130			-2.16563			MCK1	1	A8	52			-2.41		PSR2	2	A8	92			-2.21835
	CLA4	1	A9	166			-0.250406		CMP2	2	A9	114			-1.02749			CLA4	1	A9	373			0.494495		CMP2	2	A9	178			-1.71657			CLA4	1	A9	378			0.256331		CMP2	2	A9	273			-0.656207
	CKA2	1	A10	277			1.0009		PPZ1	2	A10	330			1.28851			CKA2	1	A10	316			0.00156398		PPZ1	2	A10	548			1.74493			CKA2	1	A10	365			0.150005		PPZ1	2	A10	521			1.48419
	MEK1	1	A11	172			-0.182767		MIH1	2	A11	177			-0.351988			MEK1	1	A11	367			0.442607		MIH1	2	A11	248			-1.06169			MEK1	1	A11	378			0.256331		MIH1	2	A11	207			-1.22583
	PSK2	1	A12	220			0.358339		ZDS1	2	A12	268			0.623733			PSK2	1	A12	421			0.909595		ZDS1	2	A12	464			0.95908			PSK2	1	A12	446			0.812497		ZDS1	2	A12	524			1.51008
	YPL236C	1	B1	152			-0.408229		RTS1	2	B1	267			0.613011			YPL236C	1	B1	376			0.520439		RTS1	2	B1	479			1.09941			YPL236C	1	B1	317			-0.242583		RTS1	2	B1	389			0.344947
	TPK2	1	B2	130			-0.656236		PTC5	2	B2	199			-0.1161			TPK2	1	B2	202			-0.984298		PTC5	2	B2	383			0.201292			TPK2	1	B2	425			0.64074		PTC5	2	B2	466			1.00951
	YPL150W	1	B3	157			-0.351863		PPQ1	2	B3	208			-0.0195997			YPL150W	1	B3	247			-0.595142		PPQ1	2	B3	542			1.6888			YPL150W	1	B3	373			0.215436		PPQ1	2	B3	536			1.61365
	YPL141C	1	B4	188			-0.00239852		RRD2	2	B4	221			0.119789			YPL141C	1	B4	275			-0.353		RRD2	2	B4	268			-0.874579			YPL141C	1	B4	207			-1.14226		RRD2	2	B4	241			-0.932387
	MKK2	1	B5	181			-0.0813099		PPH3	2	B5	269			0.634455			MKK2	1	B5	202			-0.984298		PPH3	2	B5	251			-1.03362			MKK2	1	B5	436			0.730708		PPH3	2	B5	337			-0.103846
	KIN1	1	B6	201			0.144151		PPM1	2	B6	37			-1.8531			KIN1	1	B6	358			0.364776		PPM1	2	B6	288			-0.687471			KIN1	1	B6	372			0.207257		PPM1	2	B6	331			-0.15563
	SLT2	1	B7	181			-0.0813099		PPZ2	2	B7	369			1.70668			SLT2	1	B7	290			-0.223282		PPZ2	2	B7	358			-0.032593			SLT2	1	B7	309			-0.308015		PPZ2	2	B7	474			1.07855
	IRE1	1	B8	413			2.53404		GIP2	2	B8	181			-0.3091			IRE1	1	B8	405			0.771228		GIP2	2	B8	284			-0.724893			IRE1	1	B8	402			0.452625		GIP2	2	B8	191			-1.36392
	KSP1	1	B9	82			-1.19734		PTP3	2	B9	226			0.1734			KSP1	1	B9	193			-1.06213		PTP3	2	B9	566			1.91333			KSP1	1	B9	172			-1.42853		PTP3	2	B9	452			0.888677
	YCK1	1	B10	234			0.516162		PPT1	2	B10	196			-0.148266			YCK1	1	B10	325			0.0793952		PPT1	2	B10	365			0.0328948			YCK1	1	B10	397			0.41173		PPT1	2	B10	471			1.05266
	KCC4	1	B11	204			0.17797		RTS3	2	B11	198			-0.126822			KCC4	1	B11	334			0.157226		RTS3	2	B11	379			0.16387			KCC4	1	B11	434			0.71435		RTS3	2	B11	456			0.923199
	SAT4	1	B12	45			-1.61445		PTC7	2	B12	237			0.291345			SAT4	1	B12	151			-1.42534		PTC7	2	B12	395			0.313557			SAT4	1	B12	147			-1.633		PTC7	2	B12	504			1.33747
	ELM1	1	C1	238			0.561254		CNB1	2	C1	117			-0.995321			ELM1	1	C1	266			-0.430832		CNB1	2	C1	268			-0.874579			ELM1	1	C1	389			0.346299		CNB1	2	C1	172			-1.5279
	HSL1	1	C2	181			-0.0813099		GAC1	2	C2	119			-0.973877			HSL1	1	C2	222			-0.81134		GAC1	2	C2	271			-0.846513			HSL1	1	C2	352			0.0436789		GAC1	2	C2	357			0.0687667
	PRR1	1	C3	128			-0.678782		PTP2	2	C3	300			0.966844			PRR1	1	C3	279			-0.318409		PTP2	2	C3	330			-0.294544			PRR1	1	C3	462			0.94336		PTP2	2	C3	421			0.621127
	YPK1	1	C4	237			0.549981		PIG1	2	C4	158			-0.555711			YPK1	1	C4	399			0.719341		PIG1	2	C4	301			-0.565851			YPK1	1	C4	404			0.468983		PIG1	2	C4	319			-0.259197
	TPK3	1	C5	219			0.347066		SAP4	2	C5	197			-0.137544			TPK3	1	C5	335			0.165874		SAP4	2	C5	354			-0.0700146			TPK3	1	C5	475			1.04969		SAP4	2	C5	239			-0.949648
	KKQ8	1	C6	204			0.17797		SAP155	2	C6	154			-0.598599			KKQ8	1	C6	283			-0.283817		SAP155	2	C6	203			-1.48268			KKQ8	1	C6	363			0.133647		SAP155	2	C6	185			-1.4157
	YKL171W	1	C7	186			-0.0249446		PSY4	2	C7	124			-0.920266			YKL171W	1	C7	290			-0.223282		PSY4	2	C7	264			-0.912001			YKL171W	1	C7	369			0.18272		PSY4	2	C7	259			-0.777035
	MKK1	1	C8	255			0.752896		PTC3	2	C8	129			-0.866655			MKK1	1	C8	381			0.563678		PTC3	2	C8	162			-1.86625			MKK1	1	C8	407			0.493519		PTC3	2	C8	243			-0.915126
	KIN4	1	C9	197			0.099059		BNI4	2	C9	241			0.334233			KIN4	1	C9	346			0.261001		BNI4	2	C9	375			0.126449			KIN4	1	C9	386			0.321762		BNI4	2	C9	547			1.70859
	SWE1	1	C10	171			-0.194041		PSY2	2	C10	168			-0.448488			SWE1	1	C10	385			0.59827		PSY2	2	C10	244			-1.09911			SWE1	1	C10	402			0.452625		PSY2	2	C10	374			0.215487
	TPK1	1	C11	216			0.313247		PAM1	2	C11	257			0.505789			TPK1	1	C11	421			0.909595		PAM1	2	C11	322			-0.369388			TPK1	1	C11	402			0.452625		PAM1	2	C11	393			0.379469
	STE20	1	C12	172			-0.182767		PIG2	2	C12	309			1.06334			STE20	1	C12	440			1.07391		PIG2	2	C12	364			0.0235394			STE20	1	C12	435			0.722529		PIG2	2	C12	478			1.11307
	RCK2	1	D1	52			-1.53553		YVH1	2	D1	177			-0.351988			RCK2	1	D1	232			-0.724861		YVH1	2	D1	434			0.678418			RCK2	1	D1	254			-0.757855		YVH1	2	D1	298			-0.440441
	SSN3	1	D2	217			0.32452		SIS2	2	D2	198			-0.126822			SSN3	1	D2	199			-1.01024		SIS2	2	D2	301			-0.565851			SSN3	1	D2	204			-1.1668		SIS2	2	D2	271			-0.673468
	PHO85	1	D3	93			-1.07334		GLC8	2	D3	232			0.237733			PHO85	1	D3	143			-1.49452		GLC8	2	D3	422			0.566153			PHO85	1	D3	199			-1.2077		GLC8	2	D3	465			1.00088
	SKS1	1	D4	134			-0.611144		ZDS2	2	D4	243			0.355678			SKS1	1	D4	213			-0.889171		ZDS2	2	D4	325			-0.341321			SKS1	1	D4	232			-0.937791		ZDS2	2	D4	333			-0.138369
	ISR1	1	D5	320			1.48565		TIP41	2	D5	252			0.452178			ISR1	1	D5	372			0.485847		TIP41	2	D5	359			-0.0232376			ISR1	1	D5	351			0.0355		TIP41	2	D5	336			-0.112477
	DBF20	1	D6	229			0.459797		LTP1	2	D6	199			-0.1161			DBF20	1	D6	356			0.34748		LTP1	2	D6	325			-0.341321			DBF20	1	D6	422			0.616203		LTP1	2	D6	436			0.750587
	KIN82	1	D7	104			-0.949335		SAP185	2	D7	530			3.43295			KIN82	1	D7	188			-1.10537		SAP185	2	D7	454			0.865526			KIN82	1	D7	180			-1.36309		SAP185	2	D7	405			0.483037
	FUS3	1	D8	22			-1.87373		YMR1	2	D8	101			-1.16688			FUS3	1	D8	124			-1.65884		YMR1	2	D8	247			-1.07104			FUS3	1	D8	93			-2.07466		YMR1	2	D8	288			-0.526747
	TEL1	1	D9	56			-1.49044		NEM1	2	D9	135			-0.802321			TEL1	1	D9	212			-0.897819		NEM1	2	D9	300			-0.575206			TEL1	1	D9	183			-1.33856		NEM1	2	D9	211			-1.19131
	YGL059W	1	D10	205			0.189243		CNA1	2	D10	91			-1.2741			YGL059W	1	D10	419			0.892299		CNA1	2	D10	270			-0.855869			YGL059W	1	D10	530			1.49953		CNA1	2	D10	185			-1.4157
	NPR1	1	D11	287			1.11363		PTP1	2	D11	229			0.205567			NPR1	1	D11	344			0.243706		PTP1	2	D11	342			-0.182279			NPR1	1	D11	479			1.0824		PTP1	2	D11	391			0.362208
	YCK2	1	D12	186			-0.0249446		PHO13	2	D12	263			0.570122			YCK2	1	D12	479			1.41117		PHO13	2	D12	364			0.0235394			YCK2	1	D12	439			0.755245		PHO13	2	D12	500			1.30295
	PTK1	1	E1	193			0.0539668		REG1	2	E1	108			-1.09182			PTK1	1	E1	348			0.278297		REG1	2	E1	490			1.20232			PTK1	1	E1	437			0.738887		REG1	2	E1	411			0.534821
	VHS1	1	E2	82			-1.19734		PTC6	2	E2	66			-1.54215			VHS1	1	E2	226			-0.776748		PTC6	2	E2	202			-1.49204			VHS1	1	E2	276			-0.577919		PTC6	2	E2	139			-1.81271
	GCN2	1	E3	169			-0.216587		PPH21	2	E3	168			-0.448488			GCN2	1	E3	345			0.252353		PPH21	2	E3	329			-0.3039			GCN2	1	E3	259			-0.71696		PPH21	2	E3	266			-0.716621
	CKA1	1	E4	231			0.482343		PPH22	2	E4	332			1.30995			CKA1	1	E4	298			-0.154098		PPH22	2	E4	381			0.182581			CKA1	1	E4	317			-0.242583		PPH22	2	E4	434			0.733325
	CMK1	1	E5	270			0.921992		GIP1	2	E5	327			1.25634			CMK1	1	E5	372			0.485847		GIP1	2	E5	547			1.73558			CMK1	1	E5	325			-0.177152		GIP1	2	E5	315			-0.29372
	PKH2	1	E6	291			1.15873		REG2	2	E6	294			0.902511			PKH2	1	E6	389			0.632862		REG2	2	E6	375			0.126449			PKH2	1	E6	442			0.779781		REG2	2	E6	498			1.28569
	SKM1	1	E7	166			-0.250406		YBR051W	2	E7	299			0.956122			SKM1	1	E7	220			-0.828636		YBR051W	2	E7	449			0.818749			SKM1	1	E7	292			-0.447056		YBR051W	2	E7	411			0.534821
	YGK3	1	E8	313			1.40673		SIW14	2	E8	247			0.398567			YGK3	1	E8	380			0.55503		SIW14	2	E8	371			0.0890272			YGK3	1	E8	387			0.329941		SIW14	2	E8	396			0.405361
	CMK2	1	E9	308			1.35037		PPG1	2	E9	200			-0.105377			CMK2	1	E9	390			0.641509		PPG1	2	E9	371			0.0890272			CMK2	1	E9	453			0.869749		PPG1	2	E9	375			0.224118
	CTK3	1	E10	8			-2.03155		TEP1	2	E10	368			1.69595			CTK3	1	E10	13			-2.61875		TEP1	2	E10	320			-0.388098			CTK3	1	E10	30			-2.58993		TEP1	2	E10	487			1.19075
	SMK1	1	E11	132			-0.63369		SDP1	2	E11	136			-0.791599			SMK1	1	E11	275			-0.353		SDP1	2	E11	171			-1.78205			SMK1	1	E11	164			-1.49396		SDP1	2	E11	170			-1.54516
	IME2	1	E12	232			0.493616		RRD1	2	E12	185			-0.266211			IME2	1	E12	427			0.961482		RRD1	2	E12	423			0.575508			IME2	1	E12	340			-0.0544681		RRD1	2	E12	367			0.155073
	BCK1	1	F1	247			0.662712		OCA1	2	F1	218			0.0876224			BCK1	1	F1	381			0.563678		OCA1	2	F1	379			0.16387			BCK1	1	F1	368			0.174542		OCA1	2	F1	316			-0.285089
	BUB1	1	F2	148			-0.453321		SAP190	2	F2	177			-0.351988			BUB1	1	F2	270			-0.39624		SAP190	2	F2	338			-0.219701			BUB1	1	F2	326			-0.168973		SAP190	2	F2	253			-0.828819
	PRR2	1	F3	58			-1.4679		PTC4	2	F3	79			-1.40277			PRR2	1	F3	156			-1.3821		PTC4	2	F3	191			-1.59495			PRR2	1	F3	196			-1.23223		PTC4	2	F3	174			-1.51064
	CHK1	1	F4	273			0.955812		PPS1	2	F4	273			0.677344			CHK1	1	F4	367			0.442607		PPS1	2	F4	436			0.697129			CHK1	1	F4	452			0.861571		PPS1	2	F4	392			0.370839
	CTK2	1	F5	224			0.403432		DCR2	2	F5	290			0.859622			CTK2	1	F5	329			0.113987		DCR2	2	F5	400			0.360334			CTK2	1	F5	389			0.346299		DCR2	2	F5	449			0.862785
	PTK2	1	F6	356			1.89148		GIP3	2	F6	171			-0.416322			PTK2	1	F6	388			0.624214		GIP3	2	F6	326			-0.331966			PTK2	1	F6	483			1.11512		GIP3	2	F6	171			-1.53653
	DUN1	1	F7	54			-1.51299		YSW1	2	F7	193			-0.180433			DUN1	1	F7	90			-1.95286		YSW1	2	F7	345			-0.154213			DUN1	1	F7	129			-1.78022		YSW1	2	F7	431			0.707434
	STE7	1	F8	368			2.02675		PTC1	2	F8	64			-1.5636			STE7	1	F8	660			2.97645		PTC1	2	F8	211			-1.40784			STE7	1	F8	539			1.57314		PTC1	2	F8	132			-1.87313
	YBR028C	1	F9	231			0.482343		PHO8	2	F9	179			-0.330544			YBR028C	1	F9	462			1.26416		PHO8	2	F9	274			-0.818447			YBR028C	1	F9	592			2.00662		PHO8	2	F9	232			-1.01006
	AKL1	1	F10	222			0.380885		YER134C	2	F10	262			0.5594			AKL1	1	F10	491			1.51495		YER134C	2	F10	429			0.631641			AKL1	1	F10	428			0.665277		YER134C	2	F10	484			1.16486
	ARK1	1	F11	273			0.955812		SIT4	2	F11	475			2.84323			ARK1	1	F11	419			0.892299		SIT4	2	F11	438			0.715839			ARK1	1	F11	379			0.26451		SIT4	2	F11	421			0.621127
	SSK2	1	F12	207			0.21179		PTC2	2	F12	249			0.420011			SSK2	1	F12	454			1.19498		PTC2	2	F12	428			0.622285			SSK2	1	F12	422			0.616203		PTC2	2	F12	491			1.22527
	YNR047W	1	G1	224			0.403432		MSG5	2	G1	159			-0.544988			YNR047W	1	G1	316			0.00156398		MSG5	2	G1	329			-0.3039			YNR047W	1	G1	314			-0.26712		MSG5	2	G1	303			-0.397288
	KSS1	1	G2	194			0.0652398		TPD3	2	G2	55			-1.6601			KSS1	1	G2	311			-0.0416756		TPD3	2	G2	223			-1.29557			KSS1	1	G2	283			-0.520666		TPD3	2	G2	179			-1.46749
	DBF2	1	G3	143			-0.509686		ALK1	2	G3	209			-0.00887753			DBF2	1	G3	400			0.727989		ALK1	2	G3	393			0.294846			DBF2	1	G3	337			-0.0790049		ALK1	2	G3	277			-0.621684
	YAK1	1	G4	228			0.448524		ALK2	2	G4	303			0.999011			YAK1	1	G4	352			0.312889		ALK2	2	G4	480			1.10877			YAK1	1	G4	456			0.894286		ALK2	2	G4	374			0.215487
	HAL5	1	G5	0			-2.12173		CKB1	2	G5	177			-0.351988			HAL5	1	G5	77			-2.06529		CKB1	2	G5	262			-0.930712			HAL5	1	G5	127			-1.79658		CKB1	2	G5	240			-0.941018
	CTK1	1	G6	42			-1.64827		CKB2	2	G6	162			-0.512822			CTK1	1	G6	177			-1.2005		CKB2	2	G6	356			-0.0513038			CTK1	1	G6	175			-1.40399		CKB2	2	G6	362			0.11192
	SSK22	1	G7	273			0.955812		CLG1	2	G7	158			-0.555711			SSK22	1	G7	403			0.753932		CLG1	2	G7	372			0.0983826			SSK22	1	G7	393			0.379014		CLG1	2	G7	319			-0.259197
	RIM11	1	G8	272			0.944538		FMP48	2	G8	308			1.05262			RIM11	1	G8	336			0.174522		FMP48	2	G8	480			1.10877			RIM11	1	G8	458			0.910644		FMP48	2	G8	519			1.46693
	HRK1	1	G9	193			0.0539668		GAL83	2	G9	199			-0.1161			HRK1	1	G9	360			0.382072		GAL83	2	G9	442			0.753261			HRK1	1	G9	388			0.33812		GAL83	2	G9	371			0.189596
	PBS2	1	G10	0			-2.12173		IKS1	2	G10	236			0.280622			PBS2	1	G10	9			-2.65334		IKS1	2	G10	424			0.584864			PBS2	1	G10	2			-2.81894		IKS1	2	G10	407			0.500298
	MLP1	1	G11	231			0.482343		KDX1	2	G11	218			0.0876224			MLP1	1	G11	438			1.05661		KDX1	2	G11	517			1.45492			MLP1	1	G11	462			0.94336		KDX1	2	G11	453			0.897308
	YPK2	1	G12	300			1.26018		PKP1	2	G12	218			0.0876224			YPK2	1	G12	582			2.30191		PKP1	2	G12	538			1.65138			YPK2	1	G12	560			1.74489		PKP1	2	G12	427			0.672911
	YDL025C	1	H1	201			0.144151		PRK1	2	H1	89			-1.29554			YDL025C	1	H1	383			0.580974		PRK1	2	H1	299			-0.584562			YDL025C	1	H1	466			0.976075		PRK1	2	H1	230			-1.02732
	MRK1	1	H2	235			0.527435		RTR1	2	H2	381			1.83534			MRK1	1	H2	341			0.217762		RTR1	2	H2	544			1.70751			MRK1	1	H2	321			-0.209868		RTR1	2	H2	487			1.19075
	PKH3	1	H3	251			0.707804		SAK1	2	H3	224			0.151956			PKH3	1	H3	351			0.304241		SAK1	2	H3	403			0.3884			PKH3	1	H3	534			1.53224		SAK1	2	H3	433			0.724695
	PKH1	1	H4	181			-0.0813099		SIP1	2	H4	191			-0.201877			PKH1	1	H4	329			0.113987		SIP1	2	H4	429			0.631641			PKH1	1	H4	352			0.0436789		SIP1	2	H4	312			-0.319612
	GIN4	1	H5	290			1.14745		SIP2	2	H5	182			-0.298377			GIN4	1	H5	459			1.23822		SIP2	2	H5	413			0.481954			GIN4	1	H5	454			0.877928		SIP2	2	H5	325			-0.207414
	SPS1	1	H6	181			-0.0813099		SNF4	2	H6	303			0.999011			SPS1	1	H6	364			0.416664		SNF4	2	H6	404			0.397756			SPS1	1	H6	388			0.33812		SNF4	2	H6	298			-0.440441
	RCK1	1	H7	345			1.76747		YCH1	2	H7	233			0.248456			RCK1	1	H7	427			0.961482		YCH1	2	H7	441			0.743906			RCK1	1	H7	430			0.681634		YCH1	2	H7	383			0.293163
	TOS3	1	H8	182			-0.0700369		BLANK	2	H8	0						TOS3	1	H8	384			0.589622		BLANK	2	H8	0						TOS3	1	H8	390			0.354478		BLANK	2	H8	0
	ATG1	1	H9	166			-0.250406		BLANK	2	H9	0						ATG1	1	H9	408			0.797172		BLANK	2	H9	0						ATG1	1	H9	380			0.272689		BLANK	2	H9	0
	YCK3	1	H10	0			-2.12173		TOR1	2	H10	305			1.02046			YCK3	1	H10	216			-0.863227		TOR1	2	H10	538			1.65138			YCK3	1	H10	214			-1.08501		TOR1	2	H10	488			1.19938
	BLANK	1	H11	0					SNF1	2	H11	210			0.00184468			BLANK	1	H11	0					SNF1	2	H11	334			-0.257123			BLANK	1	H11	0					SNF1	2	H11	313			-0.310981
	BLANK	1	H12	3					BLANK	2	H12	12						BLANK	1	H12	326					BLANK	2	H12	0						BLANK	1	H12	248					BLANK	2	H12	0

## Sheet: 0.8M NaCl - 426-Aly2
	Transformed with: __426-Aly2_			Colony Size	Mean Colony Size	Standard Deviation	Z Score					Colony Size	Mean Colony Size	Standard Deviation	Z Score			Transformed with: __426-Aly2_			Colony Size	Mean Colony Size	Standard Deviation	Z Score					Colony Size	Mean Colony Size	Standard Deviation	Z Score			Transformed with: __426-Aly2_			Colony Size	Mean Colony Size	Standard Deviation	Z Score					Colony Size	Mean Colony Size	Standard Deviation	Z Score
Replicate 1	Standard Name	KinDel PLATE #	location (KinDel)	ENTER DATA BELOW	180.67	65.6421			Standard Name	KinDel PLATE #	location (KinDel)	ENTER DATA BELOW	222.226	72.7692			Replicate 2	Standard Name	KinDel PLATE #	location (KinDel)	ENTER DATA BELOW	401.479	109.03			Standard Name	KinDel PLATE #	location (KinDel)	ENTER DATA BELOW	335.763	120.882			Replicate 3	Standard Name	KinDel PLATE #	location (KinDel)	ENTER DATA BELOW	402.213	106.589			Standard Name	KinDel PLATE #	location (KinDel)	ENTER DATA BELOW	394.602	140.254
	PSK1	1	A1	232			0.781964		STE11	2	A1	318			1.31614			PSK1	1	A1	537			1.24297		STE11	2	A1	415			0.655485			PSK1	1	A1	540			1.2927		STE11	2	A1	401			0.045616
	KIN3	1	A2	144			-0.558638		RIM15	2	A2	251			0.395417			KIN3	1	A2	444			0.389996		RIM15	2	A2	316			-0.163493			KIN3	1	A2	407			0.044913		RIM15	2	A2	277			-0.838491
	KNS1	1	A3	136			-0.680511		VPS15	2	A3	0			-3.05385			KNS1	1	A3	230			-1.57277		VPS15	2	A3	73			-2.17371			KNS1	1	A3	193			-1.9628		VPS15	2	A3	135			-1.85094
	KIN2	1	A4	40			-2.14299		BUD32	2	A4	0			-3.05385			KIN2	1	A4	206			-1.79289		BUD32	2	A4	162			-1.43746			KIN2	1	A4	200			-1.89713		BUD32	2	A4	170			-1.60139
	HOG1	1	A5	196			0.233536		GIP4	2	A5	256			0.464128			HOG1	1	A5	314			-0.802336		GIP4	2	A5	253			-0.684661			HOG1	1	A5	367			-0.33036		GIP4	2	A5	430			0.252383
	SKY1	1	A6	230			0.751496		SPO7	2	A6	173			-0.676465			SKY1	1	A6	377			-0.224514		SPO7	2	A6	143			-1.59464			SKY1	1	A6	331			-0.668106		SPO7	2	A6	219			-1.25203
	YMR291W	1	A7	223			0.644857		PSR1	2	A7	288			0.903875			YMR291W	1	A7	396			-0.0502497		PSR1	2	A7	266			-0.577119			YMR291W	1	A7	489			0.814223		PSR1	2	A7	559			1.17214
	MCK1	1	A8	229			0.736262		PSR2	2	A8	270			0.656517			MCK1	1	A8	469			0.619291		PSR2	2	A8	306			-0.246218			MCK1	1	A8	436			0.316986		PSR2	2	A8	419			0.173954
	CLA4	1	A9	190			0.142131		CMP2	2	A9	160			-0.855112			CLA4	1	A9	400			-0.0135625		CMP2	2	A9	235			-0.833567			CLA4	1	A9	414			0.110586		CMP2	2	A9	341			-0.382178
	CKA2	1	A10	175			-0.0863807		PPZ1	2	A10	266			0.601549			CKA2	1	A10	442			0.371653		PPZ1	2	A10	452			0.961568			CKA2	1	A10	477			0.701641		PPZ1	2	A10	599			1.45734
	MEK1	1	A11	200			0.294472		MIH1	2	A11	244			0.299223			MEK1	1	A11	434			0.298278		MIH1	2	A11	412			0.630668			MEK1	1	A11	474			0.673495		MIH1	2	A11	488			0.665917
	PSK2	1	A12	175			-0.0863807		ZDS1	2	A12	248			0.354191			PSK2	1	A12	494			0.848585		ZDS1	2	A12	456			0.994658			PSK2	1	A12	541			1.30208		ZDS1	2	A12	522			0.908334
	YPL236C	1	B1	160			-0.314892		RTS1	2	B1	96			-1.73461			YPL236C	1	B1	426			0.224904		RTS1	2	B1	30			-2.52943			YPL236C	1	B1	459			0.532768		RTS1	2	B1	109			-2.03631
	TPK2	1	B2	177			-0.0559125		PTC5	2	B2	206			-0.222976			TPK2	1	B2	357			-0.407949		PTC5	2	B2	298			-0.312398			TPK2	1	B2	343			-0.555524		PTC5	2	B2	547			1.08658
	YPL150W	1	B3	145			-0.543404		PPQ1	2	B3	283			0.835164			YPL150W	1	B3	322			-0.728962		PPQ1	2	B3	340			0.035047			YPL150W	1	B3	388			-0.133342		PPQ1	2	B3	411			0.116915
	YPL141C	1	B4	155			-0.391063		RRD2	2	B4	197			-0.346655			YPL141C	1	B4	352			-0.453808		RRD2	2	B4	316			-0.163493			YPL141C	1	B4	346			-0.527378		RRD2	2	B4	331			-0.453477
	MKK2	1	B5	212			0.477282		PPH3	2	B5	223			0.010639			MKK2	1	B5	404			0.0231246		PPH3	2	B5	404			0.564488			MKK2	1	B5	430			0.260695		PPH3	2	B5	372			-0.161151
	KIN1	1	B6	247			1.01048		PPM1	2	B6	246			0.326707			KIN1	1	B6	379			-0.20617		PPM1	2	B6	270			-0.544029			KIN1	1	B6	414			0.110586		PPM1	2	B6	401			0.045616
	SLT2	1	B7	0			-2.75235		PPZ2	2	B7	250			0.381675			SLT2	1	B7	173			-2.09556		PPZ2	2	B7	374			0.316312			SLT2	1	B7	165			-2.22549		PPZ2	2	B7	430			0.252383
	IRE1	1	B8	213			0.492516		GIP2	2	B8	220			-0.0305872			IRE1	1	B8	558			1.43558		GIP2	2	B8	226			-0.908019			IRE1	1	B8	504			0.95495		GIP2	2	B8	217			-1.26629
	KSP1	1	B9	224			0.660091		PTP3	2	B9	166			-0.77266			KSP1	1	B9	309			-0.848195		PTP3	2	B9	266			-0.577119			KSP1	1	B9	426			0.223168		PTP3	2	B9	598			1.45021
	YCK1	1	B10	208			0.416345		PPT1	2	B10	250			0.381675			YCK1	1	B10	376			-0.233685		PPT1	2	B10	387			0.423855			YCK1	1	B10	438			0.33575		PPT1	2	B10	566			1.22205
	KCC4	1	B11	224			0.660091		RTS3	2	B11	208			-0.195492			KCC4	1	B11	374			-0.252029		RTS3	2	B11	334			-0.0145881			KCC4	1	B11	405			0.0261493		RTS3	2	B11	567			1.22918
	SAT4	1	B12	64			-1.77737		PTC7	2	B12	216			-0.0855556			SAT4	1	B12	201			-1.83875		PTC7	2	B12	442			0.878843			SAT4	1	B12	212			-1.78454		PTC7	2	B12	401			0.045616
	ELM1	1	C1	223			0.644857		CNB1	2	C1	24			-2.72404			ELM1	1	C1	460			0.536745		CNB1	2	C1	160			-1.454			ELM1	1	C1	474			0.673495		CNB1	2	C1	209			-1.32332
	HSL1	1	C2	197			0.24877		GAC1	2	C2	236			0.189286			HSL1	1	C2	311			-0.829852		GAC1	2	C2	288			-0.395124			HSL1	1	C2	395			-0.0676689		GAC1	2	C2	404			0.0670057
	PRR1	1	C3	201			0.309706		PTP2	2	C3	139			-1.1437			PRR1	1	C3	409			0.0689835		PTP2	2	C3	187			-1.23065			PRR1	1	C3	470			0.635968		PTP2	2	C3	163			-1.6513
	YPK1	1	C4	169			-0.177785		PIG1	2	C4	59			-2.24306			YPK1	1	C4	440			0.353309		PIG1	2	C4	143			-1.59464			YPK1	1	C4	485			0.776696		PIG1	2	C4	194			-1.43027
	TPK3	1	C5	143			-0.573872		SAP4	2	C5	136			-1.18492			TPK3	1	C5	255			-1.34347		SAP4	2	C5	238			-0.808749			TPK3	1	C5	249			-1.43742		SAP4	2	C5	192			-1.44453
	KKQ8	1	C6	207			0.401111		SAP155	2	C6	188			-0.470334			KKQ8	1	C6	394			-0.0685933		SAP155	2	C6	107			-1.89245			KKQ8	1	C6	381			-0.199015		SAP155	2	C6	194			-1.43027
	YKL171W	1	C7	223			0.644857		PSY4	2	C7	186			-0.497818			YKL171W	1	C7	462			0.555088		PSY4	2	C7	154			-1.50364			YKL171W	1	C7	420			0.166877		PSY4	2	C7	215			-1.28055
	MKK1	1	C8	191			0.157365		PTC3	2	C8	275			0.725227			MKK1	1	C8	459			0.527573		PTC3	2	C8	208			-1.05692			MKK1	1	C8	479			0.720405		PTC3	2	C8	561			1.1864
	KIN4	1	C9	192			0.172599		BNI4	2	C9	236			0.189286			KIN4	1	C9	404			0.0231246		BNI4	2	C9	212			-1.02383			KIN4	1	C9	365			-0.349124		BNI4	2	C9	512			0.837035
	SWE1	1	C10	211			0.462048		PSY2	2	C10	216			-0.0855556			SWE1	1	C10	416			0.133186		PSY2	2	C10	379			0.357675			SWE1	1	C10	357			-0.424178		PSY2	2	C10	305			-0.638854
	TPK1	1	C11	251			1.07141		PAM1	2	C11	226			0.0518653			TPK1	1	C11	462			0.555088		PAM1	2	C11	408			0.597578			TPK1	1	C11	504			0.95495		PAM1	2	C11	425			0.216734
	STE20	1	C12	213			0.492516		PIG2	2	C12	231			0.120576			STE20	1	C12	461			0.545916		PIG2	2	C12	615			2.30999			STE20	1	C12	480			0.729786		PIG2	2	C12	540			1.03667
	RCK2	1	D1	204			0.355409		YVH1	2	D1	101			-1.6659			RCK2	1	D1	475			0.674321		YVH1	2	D1	322			-0.113858			RCK2	1	D1	555			1.43342		YVH1	2	D1	402			0.0527459
	SSN3	1	D2	151			-0.451999		SIS2	2	D2	223			0.010639			SSN3	1	D2	194			-1.90295		SIS2	2	D2	241			-0.783931			SSN3	1	D2	235			-1.56876		SIS2	2	D2	291			-0.738673
	PHO85	1	D3	79			-1.54886		GLC8	2	D3	249			0.367933			PHO85	1	D3	244			-1.44436		GLC8	2	D3	526			1.57373			PHO85	1	D3	335			-0.630579		GLC8	2	D3	454			0.423501
	SKS1	1	D4	142			-0.589107		ZDS2	2	D4	315			1.27491			SKS1	1	D4	279			-1.12335		ZDS2	2	D4	406			0.581033			SKS1	1	D4	265			-1.28731		ZDS2	2	D4	444			0.352202
	ISR1	1	D5	213			0.492516		TIP41	2	D5	267			0.615291			ISR1	1	D5	454			0.481714		TIP41	2	D5	456			0.994658			ISR1	1	D5	378			-0.22716		TIP41	2	D5	468			0.523319
	DBF20	1	D6	179			-0.0254442		LTP1	2	D6	249			0.367933			DBF20	1	D6	414			0.114842		LTP1	2	D6	346			0.084682			DBF20	1	D6	352			-0.471088		LTP1	2	D6	514			0.851295
	KIN82	1	D7	266			1.29992		SAP185	2	D7	266			0.601549			KIN82	1	D7	424			0.20656		SAP185	2	D7	437			0.83748			KIN82	1	D7	405			0.0261493		SAP185	2	D7	415			0.145435
	FUS3	1	D8	236			0.8429		YMR1	2	D8	216			-0.0855556			FUS3	1	D8	340			-0.56387		YMR1	2	D8	272			-0.527484			FUS3	1	D8	334			-0.63996		YMR1	2	D8	430			0.252383
	TEL1	1	D9	277			1.4675		NEM1	2	D9	248			0.354191			TEL1	1	D9	496			0.866929		NEM1	2	D9	484			1.22629			TEL1	1	D9	454			0.485859		NEM1	2	D9	424			0.209604
	YGL059W	1	D10	211			0.462048		CNA1	2	D10	244			0.299223			YGL059W	1	D10	405			0.0322964		CNA1	2	D10	489			1.26765			YGL059W	1	D10	362			-0.377269		CNA1	2	D10	447			0.373591
	NPR1	1	D11	221			0.614389		PTP1	2	D11	270			0.656517			NPR1	1	D11	420			0.169873		PTP1	2	D11	439			0.854025			NPR1	1	D11	414			0.110586		PTP1	2	D11	576			1.29335
	YCK2	1	D12	166			-0.223488		PHO13	2	D12	209			-0.18175			YCK2	1	D12	521			1.09622		PHO13	2	D12	348			0.101227			YCK2	1	D12	512			1.03		PHO13	2	D12	366			-0.20393
	PTK1	1	E1	183			0.0354923		REG1	2	E1	190			-0.44285			PTK1	1	E1	447			0.417511		REG1	2	E1	451			0.953296			PTK1	1	E1	467			0.607823		REG1	2	E1	532			0.979633
	VHS1	1	E2	201			0.309706		PTC6	2	E2	110			-1.54222			VHS1	1	E2	434			0.298278		PTC6	2	E2	142			-1.60291			VHS1	1	E2	411			0.0824403		PTC6	2	E2	121			-1.95076
	GCN2	1	E3	53			-1.94494		PPH21	2	E3	245			0.312965			GCN2	1	E3	245			-1.43519		PPH21	2	E3	280			-0.461304			GCN2	1	E3	250			-1.42803		PPH21	2	E3	267			-0.90979
	CKA1	1	E4	233			0.797198		PPH22	2	E4	96			-1.73461			CKA1	1	E4	340			-0.56387		PPH22	2	E4	224			-0.924564			CKA1	1	E4	404			0.0167675		PPH22	2	E4	155			-1.70834
	CMK1	1	E5	234			0.812432		GIP1	2	E5	287			0.890132			CMK1	1	E5	472			0.646806		GIP1	2	E5	316			-0.163493			CMK1	1	E5	426			0.223168		GIP1	2	E5	430			0.252383
	PKH2	1	E6	250			1.05618		REG2	2	E6	262			0.54658			PKH2	1	E6	476			0.683493		REG2	2	E6	403			0.556215			PKH2	1	E6	516			1.06753		REG2	2	E6	442			0.337942
	SKM1	1	E7	181			0.00502402		YBR051W	2	E7	331			1.49478			SKM1	1	E7	422			0.188217		YBR051W	2	E7	471			1.11875			SKM1	1	E7	265			-1.28731		YBR051W	2	E7	469			0.530449
	YGK3	1	E8	235			0.827666		SIW14	2	E8	238			0.21677			YGK3	1	E8	512			1.01368		SIW14	2	E8	159			-1.46228			YGK3	1	E8	431			0.270077		SIW14	2	E8	382			-0.0898521
	CMK2	1	E9	193			0.187833		PPG1	2	E9	250			0.381675			CMK2	1	E9	517			1.05954		PPG1	2	E9	278			-0.477849			CMK2	1	E9	427			0.23255		PPG1	2	E9	510			0.822775
	CTK3	1	E10	201			0.309706		TEP1	2	E10	249			0.367933			CTK3	1	E10	391			-0.0961086		TEP1	2	E10	398			0.514853			CTK3	1	E10	377			-0.236542		TEP1	2	E10	590			1.39317
	SMK1	1	E11	129			-0.78715		SDP1	2	E11	208			-0.195492			SMK1	1	E11	251			-1.38016		SDP1	2	E11	321			-0.122131			SMK1	1	E11	314			-0.827597		SDP1	2	E11	345			-0.353658
	IME2	1	E12	117			-0.969959		RRD1	2	E12	250			0.381675			IME2	1	E12	472			0.646806		RRD1	2	E12	406			0.581033			IME2	1	E12	351			-0.480469		RRD1	2	E12	571			1.2577
	BCK1	1	F1	136			-0.680511		OCA1	2	F1	200			-0.305429			BCK1	1	F1	508			0.97699		OCA1	2	F1	344			0.068137			BCK1	1	F1	517			1.07691		OCA1	2	F1	531			0.972503
	BUB1	1	F2	93			-1.33558		SAP190	2	F2	302			1.09626			BUB1	1	F2	271			-1.19672		SAP190	2	F2	380			0.365947			BUB1	1	F2	278			-1.16534		SAP190	2	F2	432			0.266643
	PRR2	1	F3	160			-0.314892		PTC4	2	F3	203			-0.264203			PRR2	1	F3	411			0.0873271		PTC4	2	F3	497			1.33383			PRR2	1	F3	432			0.279459		PTC4	2	F3	646			1.79244
	CHK1	1	F4	109			-1.09183		PPS1	2	F4	294			0.986327			CHK1	1	F4	229			-1.58194		PPS1	2	F4	363			0.225315			CHK1	1	F4	182			-2.066		PPS1	2	F4	457			0.44489
	CTK2	1	F5	204			0.355409		DCR2	2	F5	169			-0.731434			CTK2	1	F5	419			0.160701		DCR2	2	F5	246			-0.742569			CTK2	1	F5	424			0.204404		DCR2	2	F5	262			-0.94544
	PTK2	1	F6	212			0.477282		GIP3	2	F6	344			1.67343			PTK2	1	F6	478			0.701837		GIP3	2	F6	484			1.22629			PTK2	1	F6	427			0.23255		GIP3	2	F6	724			2.34857
	DUN1	1	F7	88			-1.41175		YSW1	2	F7	247			0.340449			DUN1	1	F7	227			-1.60028		YSW1	2	F7	437			0.83748			DUN1	1	F7	248			-1.4468		YSW1	2	F7	416			0.152565
	STE7	1	F8	213			0.492516		PTC1	2	F8	71			-2.07816			STE7	1	F8	547			1.33469		PTC1	2	F8	209			-1.04865			STE7	1	F8	566			1.53662		PTC1	2	F8	149			-1.75112
	YBR028C	1	F9	168			-0.19302		PHO8	2	F9	239			0.230512			YBR028C	1	F9	398			-0.0319061		PHO8	2	F9	350			0.117772			YBR028C	1	F9	506			0.973714		PHO8	2	F9	477			0.587488
	AKL1	1	F10	147			-0.512936		YER134C	2	F10	252			0.40916			AKL1	1	F10	470			0.628463		YER134C	2	F10	306			-0.246218			AKL1	1	F10	441			0.363895		YER134C	2	F10	417			0.159694
	ARK1	1	F11	216			0.538218		SIT4	2	F11	236			0.189286			ARK1	1	F11	511			1.00451		SIT4	2	F11	313			-0.188311			ARK1	1	F11	457			0.514004		SIT4	2	F11	353			-0.296619
	SSK2	1	F12	231			0.76673		PTC2	2	F12	258			0.491612			SSK2	1	F12	483			0.747696		PTC2	2	F12	423			0.721665			SSK2	1	F12	517			1.07691		PTC2	2	F12	393			-0.0114232
	YNR047W	1	G1	194			0.203068		MSG5	2	G1	251			0.395417			YNR047W	1	G1	534			1.21546		MSG5	2	G1	412			0.630668			YNR047W	1	G1	479			0.720405		MSG5	2	G1	564			1.20779
	KSS1	1	G2	194			0.203068		TPD3	2	G2	129			-1.28112			KSS1	1	G2	412			0.0964989		TPD3	2	G2	237			-0.817022			KSS1	1	G2	382			-0.189633		TPD3	2	G2	128			-1.90085
	DBF2	1	G3	104			-1.168		ALK1	2	G3	256			0.464128			DBF2	1	G3	476			0.683493		ALK1	2	G3	310			-0.213128			DBF2	1	G3	496			0.879896		ALK1	2	G3	311			-0.596075
	YAK1	1	G4	175			-0.0863807		ALK2	2	G4	274			0.711485			YAK1	1	G4	487			0.784383		ALK2	2	G4	382			0.382492			YAK1	1	G4	486			0.786077		ALK2	2	G4	370			-0.175411
	HAL5	1	G5	1			-2.73712		CKB1	2	G5	187			-0.484076			HAL5	1	G5	125			-2.5358		CKB1	2	G5	146			-1.56982			HAL5	1	G5	176			-2.12229		CKB1	2	G5	263			-0.93831
	CTK1	1	G6	0			-2.75235		CKB2	2	G6	188			-0.470334			CTK1	1	G6	159			-2.22396		CKB2	2	G6	431			0.787845			CTK1	1	G6	180			-2.08476		CKB2	2	G6	330			-0.460607
	SSK22	1	G7	233			0.797198		CLG1	2	G7	248			0.354191			SSK22	1	G7	489			0.802727		CLG1	2	G7	346			0.084682			SSK22	1	G7	464			0.579677		CLG1	2	G7	327			-0.481997
	RIM11	1	G8	246			0.995242		FMP48	2	G8	261			0.532838			RIM11	1	G8	438			0.334965		FMP48	2	G8	438			0.845753			RIM11	1	G8	419			0.157495		FMP48	2	G8	337			-0.410698
	HRK1	1	G9	187			0.0964287		GAL83	2	G9	281			0.80768			HRK1	1	G9	419			0.160701		GAL83	2	G9	426			0.746483			HRK1	1	G9	414			0.110586		GAL83	2	G9	464			0.4948
	PBS2	1	G10	2			-2.72188		IKS1	2	G10	288			0.903875			PBS2	1	G10	44			-3.27872		IKS1	2	G10	535			1.64819			PBS2	1	G10	46			-3.34193		IKS1	2	G10	504			0.779996
	MLP1	1	G11	206			0.385877		KDX1	2	G11	257			0.47787			MLP1	1	G11	485			0.766039		KDX1	2	G11	553			1.79709			MLP1	1	G11	519			1.09568		KDX1	2	G11	538			1.02241
	YPK2	1	G12	223			0.644857		PKP1	2	G12	272			0.684001			YPK2	1	G12	518			1.06871		PKP1	2	G12	448			0.928478			YPK2	1	G12	539			1.28331		PKP1	2	G12	460			0.46628
	YDL025C	1	H1	257			1.16282		PRK1	2	H1	12			-2.88894			YDL025C	1	H1	627			2.06843		PRK1	2	H1	99			-1.95863			YDL025C	1	H1	558			1.46157		PRK1	2	H1	51			-2.44985
	MRK1	1	H2	189			0.126897		RTR1	2	H2	354			1.81085			MRK1	1	H2	460			0.536745		RTR1	2	H2	499			1.35038			MRK1	1	H2	415			0.119968		RTR1	2	H2	480			0.608878
	PKH3	1	H3	230			0.751496		SAK1	2	H3	246			0.326707			PKH3	1	H3	469			0.619291		SAK1	2	H3	407			0.589305			PKH3	1	H3	528			1.18011		SAK1	2	H3	455			0.430631
	PKH1	1	H4	269			1.34563		SIP1	2	H4	260			0.519096			PKH1	1	H4	475			0.674321		SIP1	2	H4	333			-0.0228606			PKH1	1	H4	464			0.579677		SIP1	2	H4	369			-0.182541
	GIN4	1	H5	297			1.77218		SIP2	2	H5	246			0.326707			GIN4	1	H5	549			1.35303		SIP2	2	H5	372			0.299767			GIN4	1	H5	448			0.429568		SIP2	2	H5	433			0.273773
	SPS1	1	H6	298			1.78742		SNF4	2	H6	265			0.587807			SPS1	1	H6	401			-0.00439075		SNF4	2	H6	325			-0.0890407			SPS1	1	H6	420			0.166877		SNF4	2	H6	279			-0.824232
	RCK1	1	H7	179			-0.0254442		YCH1	2	H7	303			1.11001			RCK1	1	H7	540			1.27049		YCH1	2	H7	437			0.83748			RCK1	1	H7	535			1.24579		YCH1	2	H7	473			0.558969
	TOS3	1	H8	182			0.0202581		BLANK	2	H8	0						TOS3	1	H8	384			-0.160311		BLANK	2	H8	0						TOS3	1	H8	397			-0.0489053		BLANK	2	H8	0
	ATG1	1	H9	165			-0.238722		BLANK	2	H9	0						ATG1	1	H9	475			0.674321		BLANK	2	H9	0						ATG1	1	H9	524			1.14259		BLANK	2	H9	0
	YCK3	1	H10	0			-2.75235		TOR1	2	H10	312			1.23368			YCK3	1	H10	269			-1.21507		TOR1	2	H10	573			1.96254			YCK3	1	H10	226			-1.6532		TOR1	2	H10	563			1.20066
	BLANK	1	H11	0					SNF1	2	H11	202			-0.277945			BLANK	1	H11	343					SNF1	2	H11	275			-0.502666			BLANK	1	H11	303					SNF1	2	H11	273			-0.867011
	BLANK	1	H12	0					BLANK	2	H12	0						BLANK	1	H12	343					BLANK	2	H12	0						BLANK	1	H12	224					BLANK	2	H12	0

## Sheet: Col Siz change - 1.5M NaCl
1.5M NaCl	Vector Data			Aly1 Data				Aly1:	Mean Size change	Std Dev		Aly2 Data				Aly2:	Mean Size change	Std Dev
Standard Name	Avg Colony Size	Std Dev		Avg Colony Size	Std Dev	Change from Vector		Vector Change Z Score	8.71631	64.6925		Avg Colony Size	Std Dev	Change from Vector		Vector Change Z Score	-14.1998	58.8735
PSK1	246	108.669		214.667	188.665	-31.3333	PSK1	-0.619077				230.333	94.0443	-15.6667	PSK1	-0.0249162
KIN3	178.333	59.5007		291	315.544	112.667	KIN3	1.60684				169.222	78.129	-9.11111	KIN3	0.0864337
KNS1	179	72.0208		101.667	94.5216	-77.3333	KNS1	-1.33013				137.778	39.0019	-41.2222	KNS1	-0.458992
KIN2	38	23.5797		88	108.761	50	KIN2	0.638153				54.1111	45.0707	16.1111	KIN2	0.514848
HOG1	181.667	24.9867		186	106.452	4.33333	HOG1	-0.0677509				177.111	45.1299	-4.55556	HOG1	0.163812
SKY1	318.667	39.2598		119.333	129.326	-199.333	SKY1	-3.21598				179.333	68.1347	-139.333	SKY1	-2.12547
YMR291W	255.667	37.0045		278	232.768	22.3333	YMR291W	0.210488				206.778	75.1896	-48.8889	YMR291W	-0.589215
MCK1	3	2.64575		21.6667	29.2973	18.6667	MCK1	0.15381				226.222	74.9699	223.222	MCK1	4.03275
CLA4	32.6667	43.4665		279	203.774	246.333	CLA4	3.67302				172.889	68.2523	140.222	CLA4	2.62295
CKA2	221	25.5343		255	165.227	34	CKA2	0.390829				169.667	94.8701	-51.3333	CKA2	-0.630735
MEK1	232	83.5225		255.667	118.879	23.6667	MEK1	0.231099				214.333	97.6234	-17.6667	MEK1	-0.0588873
PSK2	257.667	8.5049		310.667	125.723	53	PSK2	0.684526				201.778	97.0145	-55.8889	PSK2	-0.708114
YPL236C	222	70.9295		196	171.257	-26	YPL236C	-0.536636				201	77.0779	-21	YPL236C	-0.115506
TPK2	204	43.3128		219.333	183.93	15.3333	TPK2	0.102284				134.444	55.6141	-69.5556	TPK2	-0.94025
YPL150W	151	21		149.667	81.6476	-1.33333	YPL150W	-0.155345				137.556	63.1051	-13.4444	YPL150W	0.0128295
YPL141C	143.667	70.5431		157.333	112.385	13.6667	YPL141C	0.0765213				149.444	30.6962	5.77778	YPL141C	0.33933
MKK2	146	16.7033		176.333	102.442	30.3333	MKK2	0.33415				174	54.69	28	MKK2	0.716787
KIN1	151.667	64.5084		213	179.209	61.3333	KIN1	0.81334				170.111	47.6484	18.4444	KIN1	0.554481
SLT2	198.667	67.4858		184.333	42.2532	-14.3333	SLT2	-0.356295				27.3333	28.5715	-171.333	SLT2	-2.669
IRE1	214.667	88.1608		321.333	149.938	106.667	IRE1	1.51409				221.556	74.9017	6.88889	IRE1	0.358203
KSP1	92.6667	85.4069		67	83.5404	-25.6667	KSP1	-0.531483				183.444	54.3715	90.7778	KSP1	1.7831
YCK1	177.333	55.5188		222	121.26	44.6667	YCK1	0.555711				226.111	71.4938	48.7778	YCK1	1.06971
KCC4	248.667	20.5994		259.333	115.993	10.6667	KCC4	0.0301481				220.778	74.4322	-27.8889	KCC4	-0.232518
SAT4	120.333	10.5987		91.3333	24.4404	-29	SAT4	-0.583009				80.7778	38.9934	-39.5556	SAT4	-0.430683
ELM1	244	96.9484		208.333	179.962	-35.6667	ELM1	-0.686061				159.667	72.8446	-84.3333	ELM1	-1.19126
HSL1	156.333	51.3939		160.333	172.082	4	HSL1	-0.0729035				124.556	100.361	-31.7778	HSL1	-0.298573
PRR1	163	58.7963		211.333	220.16	48.3333	PRR1	0.61239				192.556	123.46	29.5556	PRR1	0.743209
YPK1	243	51.1175		287	215.849	44	YPK1	0.545406				170.889	70.4323	-72.1111	YPK1	-0.983658
TPK3	205.333	70.7272		213.333	183.429	8	TPK3	-0.0110726				132.556	45.2466	-72.7778	TPK3	-0.994981
KKQ8	205.333	42.004		173.333	118.361	-32	KKQ8	-0.629382				187.889	90.2868	-17.4444	KKQ8	-0.0551128
YKL171W	197.667	39.5517		204.667	147.534	7	YKL171W	-0.0265303				205.333	87.78	7.66667	YKL171W	0.371414
MKK1	189.333	52.1664		227.333	159.237	38	MKK1	0.45266				174	68.5055	-15.3333	MKK1	-0.0192543
KIN4	240.667	81.7945		222	166.865	-18.6667	KIN4	-0.423279				151.667	70.7201	-89	KIN4	-1.27053
SWE1	175.333	25.697		226.333	122.361	51	SWE1	0.65361				173.444	66.2238	-1.88889	SWE1	0.209107
TPK1	265.667	55.3203		295.667	53.1539	30	TPK1	0.328998				239.222	118.453	-26.4444	TPK1	-0.207983
STE20	198	32.0468		318.667	121.228	120.667	STE20	1.7305				214.889	62.6182	16.8889	STE20	0.528059
RCK2	199	76.7268		71.6667	123.265	-127.333	RCK2	-2.10302				182.111	60.4376	-16.8889	RCK2	-0.0456763
SSN3	144	28.1603		171	125.192	27	SSN3	0.282625				107.111	35.6095	-36.8889	SSN3	-0.385388
PHO85	67.3333	17.8979		106.333	89.5116	39	PHO85	0.468117				66.5556	41.9753	-0.777778	PHO85	0.22798
SKS1	188.333	47.3533		125	76.7072	-63.3333	SKS1	-1.11372				136.778	38.8906	-51.5556	SKS1	-0.63451
ISR1	181.667	41.8609		221.667	153.598	40	ISR1	0.483575				162	44.9778	-19.6667	ISR1	-0.0928585
DBF20	134	34.1174		187.333	111.85	53.3333	DBF20	0.689678				216.667	65.5312	82.6667	DBF20	1.64533
KIN82	209.333	38.0701		100	122.049	-109.333	KIN82	-1.82478				215.889	30.0783	6.55556	KIN82	0.352541
FUS3	206.333	38.7341		43.6667	46.7155	-162.667	FUS3	-2.64919				128	57.1052	-78.3333	FUS3	-1.08935
TEL1	229	8.88819		59	50.6853	-170	TEL1	-2.76255				237.778	44.3601	8.77778	TEL1	0.390287
YGL059W	220	36.5923		241.667	122.659	21.6667	YGL059W	0.200183				200.778	35.9882	-19.2222	YGL059W	-0.0853093
NPR1	233.333	50.0633		246.667	130.401	13.3333	NPR1	0.0713687				228.889	122.021	-4.44444	NPR1	0.1657
YCK2	144.333	14.2244		261.667	133.702	117.333	YCK2	1.67897				224.556	91.762	80.2222	YCK2	1.60381
PTK1	245.667	63.0106		237.333	184.175	-8.33333	PTK1	-0.263549				214.444	82.887	-31.2222	PTK1	-0.289136
VHS1	106	52.0481		117	133.989	11	VHS1	0.0353007				159	64.3739	53	VHS1	1.14143
GCN2	203.667	38.371		218.667	183.481	15	GCN2	0.0971316				56.6667	41.6693	-147	GCN2	-2.25569
CKA1	206.667	68.1493		180.333	125.005	-26.3333	CKA1	-0.541788				202	34.5109	-4.66667	CKA1	0.161925
CMK1	225	39.9625		263.667	173.754	38.6667	CMK1	0.462965				206.889	57.8737	-18.1111	CMK1	-0.0664365
PKH2	274.333	66.9726		243.333	172.355	-31	PKH2	-0.613924				183.778	70.4662	-90.5556	PKH2	-1.29695
SKM1	138.667	122.087		155	92.1466	16.3333	SKM1	0.117742				180	49	41.3333	SKM1	0.943262
YGK3	248.333	14.2244		228.667	151.163	-19.6667	YGK3	-0.438737				233.333	85.5005	-15	YGK3	-0.0135925
CMK2	259.667	74.0968		306.667	157.7	47	CMK2	0.591779				210.444	36.7957	-49.2222	CMK2	-0.594877
CTK3	4.33333	5.1316		2	3.4641	-2.33333	CTK3	-0.170803				176.889	61.8604	172.556	CTK3	3.17215
SMK1	226.667	59.911		153.667	78.5897	-73	SMK1	-1.26315				140.333	40.2161	-86.3333	SMK1	-1.22523
IME2	218.333	65.0103		264.667	83.6082	46.3333	IME2	0.581474				197.667	58.0201	-20.6667	IME2	-0.109844
BCK1	223	35.5949		220.667	121.726	-2.33333	BCK1	-0.170803				233.333	104.175	10.3333	BCK1	0.416709
BUB1	116	24.2693		177	172.253	61	BUB1	0.808188				125.667	37.1124	9.66667	BUB1	0.405385
PRR2	170.667	36.6106		44.3333	67.4117	-126.333	PRR2	-2.08756				122.222	79.8654	-48.4444	PRR2	-0.581666
CHK1	214	49.96		209.333	184.286	-4.66667	CHK1	-0.206871				97.5556	32.8115	-116.444	CHK1	-1.73668
CTK2	224.333	51.0033		247.667	189.616	23.3333	CTK2	0.225946				219.667	78.1174	-4.66667	CTK2	0.161925
PTK2	232.333	53.2572		263.333	155.053	31	PTK2	0.344455				190.889	57.6631	-41.4444	PTK2	-0.462767
DUN1	184.333	47.0886		26.6667	32.3316	-157.667	DUN1	-2.5719				105.222	26.4036	-79.1111	DUN1	-1.10256
STE7	223.333	15.6312		347.333	172.309	124	STE7	1.78203				261.667	65.4319	38.3333	STE7	0.892305
YBR028C	248.333	34.1223		304	135.834	55.6667	YBR028C	0.725746				190.333	69.673	-58	YBR028C	-0.743972
AKL1	257.333	44.7698		294.667	114.548	37.3333	AKL1	0.442354				212.889	46.8974	-44.4444	AKL1	-0.513723
ARK1	215	49.4267		222.333	134.812	7.33333	ARK1	-0.0213777				218.556	61.9967	3.55556	ARK1	0.301584
SSK2	233.667	28.589		284.333	108.353	50.6667	SSK2	0.648458				221	68.942	-12.6667	SSK2	0.0260405
YNR047W	207	34.0735		203.333	151.771	-3.66667	YNR047W	-0.191413				181.889	53.8984	-25.1111	YNR047W	-0.185336
KSS1	187.667	15.0111		159	104.403	-28.6667	KSS1	-0.577856				157.556	60.2406	-30.1111	KSS1	-0.270263
DBF2	166	46.2277		195	216.839	29	DBF2	0.31354				163	74.505	-3	DBF2	0.190234
YAK1	211.667	62.9788		213	117.529	1.33333	YAK1	-0.114124				135.222	86.7399	-76.4444	YAK1	-1.05726
HAL5	85.3333	22.3681		36.6667	29.4845	-48.6667	HAL5	-0.887011				38.6667	28.006	-46.6667	HAL5	-0.551469
CTK1	8.33333	1.52753		52	70	43.6667	CTK1	0.540254				17.4444	26.8252	9.11111	CTK1	0.395949
SSK22	217.333	37.1124		227	147.177	9.66667	SSK22	0.0146903				195.778	53.1459	-21.5556	SSK22	-0.124942
RIM11	106.667	29.5691		204	127.574	97.3333	RIM11	1.36982				186.667	60.1692	80	RIM11	1.60004
HRK1	214	62.857		245	202.082	31	HRK1	0.344455				185.333	60.0111	-28.6667	HRK1	-0.245729
PBS2	0.333333	0.57735		0.666667	1.1547	0.333333	PBS2	-0.129582				2.77778	4.81125	2.44444	PBS2	0.282711
MLP1	247.667	56.5892		253	133.315	5.33333	MLP1	-0.0522932				237.222	76.2746	-10.4444	MLP1	0.0637863
YPK2	254.667	30.8275		328.667	177.213	74	YPK2	1.00914				292.556	102.624	37.8889	YPK2	0.884756
YDL025C	271.667	31.5647		269.333	138.551	-2.33333	YDL025C	-0.170803				268.444	62.3559	-3.22222	YDL025C	0.18646
MRK1	206	49.5076		212.667	116.98	6.66667	MRK1	-0.0316829				175.111	42.2221	-30.8889	MRK1	-0.283474
PKH3	233.667	29.7714		221.333	159.857	-12.3333	PKH3	-0.32538				190.667	50.0133	-43	PKH3	-0.489189
PKH1	222.333	29.023		239.333	174.041	17	PKH1	0.128047				229.111	69.0775	6.77778	PKH1	0.356316
GIN4	247.667	20.8167		276.667	112.256	29	GIN4	0.31354				298.667	60.5007	51	GIN4	1.10746
SPS1	222.667	19.1398		255	124.133	32.3333	SPS1	0.365066				233.667	62.2281	11	SPS1	0.428032
RCK1	230.667	49.8932		259.667	125.576	29	RCK1	0.31354				216.667	55.1936	-14	RCK1	0.0033931
TOS3	238	39.95		236	154.029	-2	TOS3	-0.16565				181	38.5876	-57	TOS3	-0.726987
ATG1	220.333	73.7044		178.667	115.747	-41.6667	ATG1	-0.778807				157.889	72.7693	-62.4444	ATG1	-0.819464
YCK3	11.6667	10.6927		64.6667	112.006	53	YCK3	0.684526	Mean Size change	Std Dev		25.2222	41.966	13.5556	YCK3	0.47144	Mean Size change	Std Dev
									-47.7348	75.1855							-71.4215	56.3421
STE11	341.333	162.93		295.333	105.718	-46	STE11	0.0230732				246.111	82.3774	-95.2222	STE11	-0.422433
RIM15	252	87.4014		276.667	141.539	24.6667	RIM15	0.962971				199.889	67.5453	-52.1111	RIM15	0.342735
VPS15	38.3333	59.5427		42	72.7461	3.66667	VPS15	0.683662				15.4444	26.7506	-22.8889	VPS15	0.861392
BUD32	37	60.6548		57.3333	99.3042	20.3333	BUD32	0.905336				24.6667	42.7239	-12.3333	BUD32	1.04874
GIP4	262.667	149.614		254	121.347	-8.66667	GIP4	0.519623				238	76.961	-24.6667	GIP4	0.829839
SPO7	293.333	109.792		350.667	255.862	57.3333	SPO7	1.39745				114.667	64.9333	-178.667	SPO7	-1.90347
PSR1	287.667	116.809		255	155.084	-32.6667	PSR1	0.200412				289.444	119.261	1.77778	PSR1	1.29919
PSR2	322.667	144.244		32	40.8412	-290.667	PSR2	-3.2311				268.556	116.957	-54.1111	PSR2	0.307237
CMP2	222.333	83.8113		146	87.8806	-76.3333	CMP2	-0.380374				164	65.3376	-58.3333	CMP2	0.232298
PPZ1	408	213.825		363.667	155.465	-44.3333	PPZ1	0.0452406				306.111	67.6957	-101.889	PPZ1	-0.540757
MIH1	266.333	66.6658		143.667	53.7246	-122.667	MIH1	-0.996627				235.111	103.244	-31.2222	MIH1	0.713486
ZDS1	283	146.366		396.667	242.863	113.667	ZDS1	2.14671				248.667	74.4468	-34.3333	ZDS1	0.658268
RTS1	219.667	133.732		226.667	70.6069	7	RTS1	0.727997				75.1111	59.9114	-144.556	RTS1	-1.29804
PTC5	288	165.554		288.667	223.878	0.666667	PTC5	0.64376				254.778	121.931	-33.2222	PTC5	0.677989
PPQ1	311	133.225		306.333	239.609	-4.66667	PPQ1	0.572825				269.111	68.5617	-41.8889	PPQ1	0.524166
RRD2	227	129.8		193.667	62.5806	-33.3333	RRD2	0.191545				159.222	52.0271	-67.7778	RRD2	0.0646714
PPH3	288.333	124.905		228	97.0618	-60.3333	PPH3	-0.167566				200.111	79.8334	-88.2222	PPH3	-0.298191
PPM1	320.333	153.461		132.333	80.3513	-188	PPM1	-1.86559				219.778	97.6413	-100.556	PPM1	-0.517092
PPZ2	310	104.024		313.667	225.392	3.66667	PPZ2	0.683662				221.889	77.6919	-88.1111	PPZ2	-0.296219
GIP2	273	119.662		148.333	58.1062	-124.667	GIP2	-1.02323				170.444	59.5141	-102.556	GIP2	-0.55259
PTP3	276.667	103.655		302.333	174.821	25.6667	PTP3	0.976271				181.444	66.7203	-95.2222	PTP3	-0.422433
PPT1	294	144.042		242.333	138.857	-51.6667	PPT1	-0.052296				222.111	80.6703	-71.8889	PPT1	-0.0082956
RTS3	276.333	167.025		280.333	149.968	4	RTS3	0.688095				214.889	88.9047	-61.4444	RTS3	0.17708
PTC7	323.667	198.858		271.333	153.207	-52.3333	PTC7	-0.061163				202.333	60.6987	-121.333	PTC7	-0.885872
CNB1	113.667	81.1316		124	125.491	10.3333	CNB1	0.772331				55.8889	55.8334	-57.7778	CNB1	0.242159
GAC1	277.333	120.79		139.667	69.8164	-137.667	GAC1	-1.19613				252.556	90.2696	-24.7778	GAC1	0.827867
PTP2	235	62.1932		330	182	95	PTP2	1.89844				114.667	42.1228	-120.333	PTP2	-0.868123
PIG1	330	160.222		173.667	117.738	-156.333	PIG1	-1.44441				60.5556	40.5166	-269.444	PIG1	-3.51466
SAP4	282	140.082		228	131.412	-54	SAP4	-0.0833304				147	62.2656	-135	SAP4	-1.12844
SAP155	172.667	49.3187		153.333	41.4287	-19.3333	SAP155	0.377752				145.333	68.252	-27.3333	SAP155	0.782509
PSY4	136.667	53.7153		146.333	106.35	9.66667	PSY4	0.763464				146.556	45.5514	9.88889	PSY4	1.44316
PTC3	269	71.5472		153.333	81.304	-115.667	PTC3	-0.903524				271	100.015	2	PTC3	1.30314
BNI4	291.333	137.019		318.667	156.845	27.3333	BNI4	0.998439				214.222	84.9342	-77.1111	BNI4	-0.100983
PSY2	247.333	75.1421		159.667	72.1411	-87.6667	PSY2	-0.531112				203.667	91.5769	-43.6667	PSY2	0.492613
PAM1	305.333	104.963		264.667	120.674	-40.6667	PAM1	0.0940088				234.444	87.7986	-70.8889	PAM1	0.00945313
PIG2	332.667	155.32		332.333	113.474	-0.333333	PIG2	0.63046				231.889	65.2025	-100.778	PIG2	-0.521037
YVH1	207.667	161.407		142.333	104.892	-65.3333	YVH1	-0.234069				132.333	51.0816	-75.3333	YVH1	-0.0694301
SIS2	237.667	47.606		181.333	52.1664	-56.3333	SIS2	-0.114365				180.556	70.9431	-57.1111	SIS2	0.253991
GLC8	357	147.238		329.333	209.402	-27.6667	GLC8	0.266915				274.111	90.7342	-82.8889	GLC8	-0.203532
ZDS2	316	126.028		222.333	134.968	-93.6667	ZDS2	-0.610914				246.333	68.8065	-69.6667	ZDS2	0.031146
TIP41	247.333	92.6517		208.667	85.3366	-38.6667	TIP41	0.12061				255.889	64.3897	8.55556	TIP41	1.41949
LTP1	219.667	92.3544		247.667	110.365	28	LTP1	1.00731				230.889	79.3875	11.2222	LTP1	1.46682
SAP185	323.667	90.0463		355	182.929	31.3333	SAP185	1.05164				268.556	64.8351	-55.1111	SAP185	0.289489
YMR1	290.667	135.397		110.333	44.8144	-180.333	YMR1	-1.76362				199.556	96.6329	-91.1111	YMR1	-0.349466
NEM1	310	158.101		150.333	57.0731	-159.667	NEM1	-1.48874				222.111	71.2931	-87.8889	NEM1	-0.292275
CNA1	264.333	93.1146		100.333	56.7127	-164	CNA1	-1.54638				241.222	67.5363	-23.1111	CNA1	0.857448
PTP1	276.333	128.376		246	140.3	-30.3333	PTP1	0.231447				255	84.788	-21.3333	PTP1	0.889001
PHO13	274.667	64.1275		286	229.059	11.3333	PHO13	0.785632				180.111	97.225	-94.5556	PHO13	-0.4106
REG1	340.333	196.942		247	228.777	-93.3333	REG1	-0.606481				182.222	88.409	-158.111	REG1	-1.53863
PTC6	96.6667	45.9384		111.333	62.5646	14.6667	PTC6	0.829967				107.333	44.7363	10.6667	PTC6	1.45696
PPH21	276	85.1587		234	96.5609	-42	PPH21	0.0762749				237.778	45.9835	-38.2222	PPH21	0.589245
PPH22	330.667	86.1994		296.667	180.854	-34	PPH22	0.182678				112.111	33.2271	-218.556	PPH22	-2.61144
GIP1	310	118.882		297.667	89.5786	-12.3333	GIP1	0.470855				262.444	65.0814	-47.5556	GIP1	0.42359
REG2	344.333	78.6215		300.667	174.374	-43.6667	REG2	0.0541075				258.778	81.9704	-85.5556	REG2	-0.250862
YBR051W	281.667	109.519		238	74.4849	-43.6667	YBR051W	0.0541075				283.333	81.1316	1.66667	YBR051W	1.29722
SIW14	248.667	40.8575		229.667	52.0416	-19	SIW14	0.382185				221.556	89.9811	-27.1111	SIW14	0.786453
PPG1	254.333	60.6163		250.667	124.669	-3.66667	PPG1	0.586125				229	75.9737	-25.3333	PPG1	0.818006
TEP1	270	142.084		270	119.151	0	TEP1	0.634893				203.222	61.837	-66.7778	TEP1	0.0824201
SDP1	282.667	72.4523		159.667	50.5602	-123	SDP1	-1.00106				170.333	33.8428	-112.333	SDP1	-0.726133
RRD1	344.667	77.861		279.333	157.383	-65.3333	RRD1	-0.234069				185.333	83.5783	-159.333	RRD1	-1.56032
OCA1	274.667	41.501		197.333	56.0387	-77.3333	OCA1	-0.393674				189.889	121.15	-84.7778	OCA1	-0.237057
SAP190	331.667	99.5004		173	80.2247	-158.667	SAP190	-1.47544				261.889	91.8515	-69.7778	SAP190	0.0291739
PTC4	283.333	103.51		75	90.0722	-208.333	PTC4	-2.13603				238.222	71.6506	-45.1111	PTC4	0.466976
PPS1	308.333	80.5254		266	102.328	-42.3333	PPS1	0.0718414				313.778	136.734	5.44444	PPS1	1.36427
DCR2	291.333	119.718		258.333	118.374	-33	DCR2	0.195979				131.556	39.1866	-159.778	DCR2	-1.56821
GIP3	364.667	113.509		149.667	34.4867	-215	GIP3	-2.2247				335.444	78.8433	-29.2222	GIP3	0.748983
YSW1	286	82.6378		248.333	84.1804	-37.6667	YSW1	0.13391				214.222	69.4633	-71.7778	YSW1	-0.00632352
PTC1	125	135.37		94	66.8132	-31	PTC1	0.22258				59	24.6374	-66	PTC1	0.0962247
PHO8	307	93.6643		150.667	31.8957	-156.333	PHO8	-1.44441				224.333	73.9076	-82.6667	PHO8	-0.199587
YER134C	214	70.4486		298.333	123.541	84.3333	YER134C	1.75656				224.667	89.2879	10.6667	YER134C	1.45696
SIT4	158	56.9298		313	119.879	155	SIT4	2.69646				183.333	62.8517	25.3333	SIT4	1.71728
PTC2	367.667	206.507		248.333	89.8573	-119.333	PTC2	-0.952292				221.778	76.6908	-145.889	PTC2	-1.3217
MSG5	284.667	99.2791		144	82.6136	-140.667	MSG5	-1.23604				265.444	80.7254	-19.2222	MSG5	0.926471
TPD3	182	60.6712		85.6667	65.0026	-96.3333	TPD3	-0.646382				93.3333	47.5955	-88.6667	TPD3	-0.30608
ALK1	216.667	94.7066		208.333	30.0222	-8.33333	ALK1	0.524056				244.333	52.0801	27.6667	ALK1	1.75869
ALK2	369	116.503		282	95.8593	-87	ALK2	-0.522245				223.778	73.7574	-145.222	ALK2	-1.30987
CKB1	192	41.5812		150.333	36.074	-41.6667	CKB1	0.0807084				135.667	40.1539	-56.3333	CKB1	0.267796
CKB2	243	120.516		188.333	147.974	-54.6667	CKB2	-0.0921973				151.444	66.1684	-91.5556	CKB2	-0.357354
CLG1	237	60		273.667	224.91	36.6667	CLG1	1.12258				167.556	59.3711	-69.4444	CLG1	0.0350902
FMP48	360.667	178.383		293	129.457	-67.6667	FMP48	-0.265103				226.333	58.5947	-134.333	FMP48	-1.11661
GAL83	260.667	95.7201		252.333	124.649	-8.33333	GAL83	0.524056				200.556	62.0558	-60.1111	GAL83	0.200745
IKS1	391	160.944		276.667	140.008	-114.333	IKS1	-0.88579				215.778	91.0704	-175.222	IKS1	-1.84233
KDX1	314	97.8928		273.333	125.958	-40.6667	KDX1	0.0940088				260.444	92.7627	-53.5556	KDX1	0.317098
PKP1	338.333	133.178		250.667	181.313	-87.6667	PKP1	-0.531112				180.556	85.4201	-157.778	PKP1	-1.53271
PRK1	34.6667	27.0617		143.667	127.445	109	PRK1	2.08464				17.5556	20.2219	-17.1111	PRK1	0.96394
RTR1	397	162.133		368.333	117.07	-28.6667	RTR1	0.253614				306.889	71.8798	-90.1111	RTR1	-0.331717
SAK1	304	131.145		238.333	82.6821	-65.6667	SAK1	-0.238502				194.556	67.332	-109.444	SAK1	-0.674859
SIP1	303	128.339		216.667	71.2765	-86.3333	SIP1	-0.513378				222.667	69.6156	-80.3333	SIP1	-0.158174
SIP2	362.333	208.471		215.667	135.375	-146.667	SIP2	-1.31584				179.333	54.7753	-183	SIP2	-1.98038
SNF4	236.667	77.7453		230.667	54.7844	-6	SNF4	0.555091				241.778	20.2932	5.11111	SNF4	1.35836
YCH1	303.667	114.492		277	87.7895	-26.6667	YCH1	0.280215				226.333	79.758	-77.3333	YCH1	-0.104928
TOR1	387.333	187.681		294.333	170.893	-93	TOR1	-0.602048				267	99.5339	-120.333	TOR1	-0.868123
SNF1	159.333	35.6417		170	57.1664	10.6667	SNF1	0.776765				127.111	50.4451	-32.2222	SNF1	0.695737

## Sheet: 1.5M NaCl - 426-Vector
	Transformed with: _426-Vector_			Colony Size	Mean Colony Size	Standard Deviation	Z Score					Colony Size	Mean Colony Size	Standard Deviation	Z Score			Transformed with: _426-Vector_			Colony Size	Mean Colony Size	Standard Deviation	Z Score					Colony Size	Mean Colony Size	Standard Deviation	Z Score			Transformed with: _426-Vector_			Colony Size	Mean Colony Size	Standard Deviation	Z Score					Colony Size	Mean Colony Size	Standard Deviation	Z Score
Replicate 1	Standard Name	KinDel PLATE #	location (KinDel)	ENTER DATA BELOW	218.223	76.333			Standard Name	KinDel PLATE #	location (KinDel)	ENTER DATA BELOW	236.462	70.7338			Replicate 2	Standard Name	KinDel PLATE #	location (KinDel)	ENTER DATA BELOW	183.011	77.7078			Standard Name	KinDel PLATE #	location (KinDel)	ENTER DATA BELOW	187.731	61.6193			Replicate 3	Standard Name	KinDel PLATE #	location (KinDel)	ENTER DATA BELOW	165.755	73.2362			Standard Name	KinDel PLATE #	location (KinDel)	ENTER DATA BELOW	392.237	116.869
	PSK1	1	A1	351			1.73944		STE11	2	A1	289			0.742751			PSK1	1	A1	253			0.900673		STE11	2	A1	211			0.377622			PSK1	1	A1	134			-0.433601		STE11	2	A1	524			1.12745
	KIN3	1	A2	247			0.376987		RIM15	2	A2	234			-0.0348117			KIN3	1	A2	142			-0.527754		RIM15	2	A2	175			-0.20661			KIN3	1	A2	146			-0.269748		RIM15	2	A2	347			-0.387071
	KNS1	1	A3	262			0.573495		VPS15	2	A3	1			-3.32885			KNS1	1	A3	142			-0.527754		VPS15	2	A3	7			-2.93303			KNS1	1	A3	133			-0.447256		VPS15	2	A3	107			-2.44066
	KIN2	1	A4	64			-2.0204		BUD32	2	A4	0			-3.34299			KIN2	1	A4	32			-1.94331		BUD32	2	A4	4			-2.98171			KIN2	1	A4	18			-2.01752		BUD32	2	A4	107			-2.44066
	HOG1	1	A5	160			-0.762755		GIP4	2	A5	166			-0.996162			HOG1	1	A5	209			0.33445		GIP4	2	A5	187			-0.0118661			HOG1	1	A5	176			0.139885		GIP4	2	A5	435			0.36591
	SKY1	1	A6	364			1.90974		SPO7	2	A6	216			-0.289287			SKY1	1	A6	296			1.45403		SPO7	2	A6	245			0.929397			SKY1	1	A6	296			1.77842		SPO7	2	A6	419			0.229004
	YMR291W	1	A7	255			0.481791		PSR1	2	A7	210			-0.374112			YMR291W	1	A7	219			0.463137		PSR1	2	A7	231			0.702196			YMR291W	1	A7	293			1.73746		PSR1	2	A7	422			0.254674
	MCK1	1	A8	4			-2.80643		PSR2	2	A8	232			-0.0630867			MCK1	1	A8	5			-2.29077		PSR2	2	A8	247			0.961855			MCK1	1	A8	0			-2.2633		PSR2	2	A8	489			0.827967
	CLA4	1	A9	82			-1.78459		CMP2	2	A9	170			-0.939612			CLA4	1	A9	16			-2.14921		CMP2	2	A9	178			-0.157924			CLA4	1	A9	0			-2.2633		CMP2	2	A9	319			-0.626656
	CKA2	1	A10	243			0.324585		PPZ1	2	A10	312			1.06791			CKA2	1	A10	227			0.566087		PPZ1	2	A10	259			1.1566			CKA2	1	A10	193			0.372011		PPZ1	2	A10	653			2.23125
	MEK1	1	A11	288			0.914107		MIH1	2	A11	208			-0.402387			MEK1	1	A11	272			1.14518		MIH1	2	A11	252			1.043			MEK1	1	A11	136			-0.406292		MIH1	2	A11	339			-0.455524
	PSK2	1	A12	264			0.599696		ZDS1	2	A12	222			-0.204462			PSK2	1	A12	261			1.00362		ZDS1	2	A12	177			-0.174153			PSK2	1	A12	248			1.12301		ZDS1	2	A12	450			0.494259
	YPL236C	1	B1	288			0.914107		RTS1	2	B1	138			-1.39201			YPL236C	1	B1	231			0.617562		RTS1	2	B1	147			-0.661013			YPL236C	1	B1	147			-0.256094		RTS1	2	B1	374			-0.156043
	TPK2	1	B2	250			0.416289		PTC5	2	B2	224			-0.176187			TPK2	1	B2	164			-0.244643		PTC5	2	B2	164			-0.385126			TPK2	1	B2	198			0.440283		PTC5	2	B2	476			0.716731
	YPL150W	1	B3	175			-0.566248		PPQ1	2	B3	283			0.657926			YPL150W	1	B3	142			-0.527754		PPQ1	2	B3	194			0.101735			YPL150W	1	B3	136			-0.406292		PPQ1	2	B3	456			0.545599
	YPL141C	1	B4	223			0.0625757		RRD2	2	B4	191			-0.642725			YPL141C	1	B4	88			-1.22267		RRD2	2	B4	119			-1.11542			YPL141C	1	B4	120			-0.624764		RRD2	2	B4	371			-0.181713
	MKK2	1	B5	161			-0.749654		PPH3	2	B5	271			0.488276			MKK2	1	B5	128			-0.707916		PPH3	2	B5	173			-0.239068			MKK2	1	B5	149			-0.228785		PPH3	2	B5	421			0.246117
	KIN1	1	B6	211			-0.0946301		PPM1	2	B6	264			0.389314			KIN1	1	B6	161			-0.283249		PPM1	2	B6	203			0.247793			KIN1	1	B6	83			-1.12998		PPM1	2	B6	494			0.87075
	SLT2	1	B7	243			0.324585		PPZ2	2	B7	279			0.601376			SLT2	1	B7	121			-0.797997		PPZ2	2	B7	225			0.604824			SLT2	1	B7	232			0.904535		PPZ2	2	B7	426			0.2889
	IRE1	1	B8	311			1.21542		GIP2	2	B8	231			-0.0772242			IRE1	1	B8	195			0.154288		GIP2	2	B8	180			-0.125467			IRE1	1	B8	138			-0.378984		GIP2	2	B8	408			0.134882
	KSP1	1	B9	170			-0.63175		PTP3	2	B9	225			-0.162049			KSP1	1	B9	107			-0.978159		PTP3	2	B9	209			0.345165			KSP1	1	B9	1			-2.24964		PTP3	2	B9	396			0.0322023
	YCK1	1	B10	241			0.298384		PPT1	2	B10	260			0.332764			YCK1	1	B10	139			-0.56636		PPT1	2	B10	170			-0.287754			YCK1	1	B10	152			-0.187821		PPT1	2	B10	452			0.511372
	KCC4	1	B11	272			0.7045		RTS3	2	B11	225			-0.162049			KCC4	1	B11	241			0.746249		RTS3	2	B11	141			-0.758386			KCC4	1	B11	233			0.918189		RTS3	2	B11	463			0.605495
	SAT4	1	B12	122			-1.26057		PTC7	2	B12	238			0.0217383			SAT4	1	B12	130			-0.682179		PTC7	2	B12	182			-0.0930095			SAT4	1	B12	109			-0.774963		PTC7	2	B12	551			1.35848
	ELM1	1	C1	354			1.77874		CNB1	2	C1	74			-2.29681			ELM1	1	C1	207			0.308712		CNB1	2	C1	60			-2.07291			ELM1	1	C1	171			0.0716132		CNB1	2	C1	207			-1.585
	HSL1	1	C2	211			-0.0946301		GAC1	2	C2	245			0.120701			HSL1	1	C2	149			-0.437673		GAC1	2	C2	176			-0.190382			HSL1	1	C2	109			-0.774963		GAC1	2	C2	411			0.160551
	PRR1	1	C3	230			0.154279		PTP2	2	C3	249			0.177251			PRR1	1	C3	139			-0.56636		PTP2	2	C3	167			-0.33644			PRR1	1	C3	120			-0.624764		PTP2	2	C3	289			-0.883354
	YPK1	1	C4	247			0.376987		PIG1	2	C4	239			0.0358758			YPK1	1	C4	190			0.0899441		PIG1	2	C4	236			0.783339			YPK1	1	C4	292			1.7238		PIG1	2	C4	515			1.05044
	TPK3	1	C5	287			0.901007		SAP4	2	C5	233			-0.0489492			TPK3	1	C5	164			-0.244643		SAP4	2	C5	173			-0.239068			TPK3	1	C5	165			-0.0103135		SAP4	2	C5	440			0.408693
	KKQ8	1	C6	247			0.376987		SAP155	2	C6	183			-0.755825			KKQ8	1	C6	206			0.295844		SAP155	2	C6	119			-1.11542			KKQ8	1	C6	163			-0.0376224		SAP155	2	C6	216			-1.50799
	YKL171W	1	C7	221			0.0363748		PSY4	2	C7	114			-1.73131			YKL171W	1	C7	220			0.476006		PSY4	2	C7	98			-1.45622			YKL171W	1	C7	152			-0.187821		PSY4	2	C7	198			-1.66201
	MKK1	1	C8	202			-0.212534		PTC3	2	C8	272			0.502414			MKK1	1	C8	234			0.656168		PTC3	2	C8	196			0.134192			MKK1	1	C8	132			-0.46091		PTC3	2	C8	339			-0.455524
	KIN4	1	C9	277			0.770002		BNI4	2	C9	238			0.0217383			KIN4	1	C9	298			1.47977		BNI4	2	C9	189			0.0205912			KIN4	1	C9	147			-0.256094		BNI4	2	C9	447			0.468589
	SWE1	1	C10	205			-0.173233		PSY2	2	C10	242			0.0782884			SWE1	1	C10	161			-0.283249		PSY2	2	C10	175			-0.20661			SWE1	1	C10	160			-0.0785857		PSY2	2	C10	325			-0.575317
	TPK1	1	C11	293			0.97961		PAM1	2	C11	282			0.643789			TPK1	1	C11	302			1.53124		PAM1	2	C11	214			0.426308			TPK1	1	C11	202			0.494901		PAM1	2	C11	420			0.237561
	STE20	1	C12	231			0.16738		PIG2	2	C12	241			0.0641508			STE20	1	C12	167			-0.206036		PIG2	2	C12	245			0.929397			STE20	1	C12	196			0.412974		PIG2	2	C12	512			1.02477
	RCK2	1	D1	286			0.887906		YVH1	2	D1	111			-1.77373			RCK2	1	D1	170			-0.16743		YVH1	2	D1	118			-1.13165			RCK2	1	D1	141			-0.33802		YVH1	2	D1	394			0.0150891
	SSN3	1	D2	151			-0.880659		SIS2	2	D2	234			-0.0348117			SSN3	1	D2	113			-0.900947		SIS2	2	D2	192			0.0692773			SSN3	1	D2	168			0.0306499		SIS2	2	D2	287			-0.900468
	PHO85	1	D3	87			-1.71909		GLC8	2	D3	335			1.39308			PHO85	1	D3	52			-1.68594		GLC8	2	D3	222			0.556138			PHO85	1	D3	63			-1.40307		GLC8	2	D3	514			1.04188
	SKS1	1	D4	243			0.324585		ZDS2	2	D4	290			0.756889			SKS1	1	D4	160			-0.296117		ZDS2	2	D4	205			0.28025			SKS1	1	D4	162			-0.0512768		ZDS2	2	D4	453			0.519929
	ISR1	1	D5	230			0.154279		TIP41	2	D5	279			0.601376			ISR1	1	D5	158			-0.321855		TIP41	2	D5	143			-0.725928			ISR1	1	D5	157			-0.119549		TIP41	2	D5	320			-0.6181
	DBF20	1	D6	172			-0.605549		LTP1	2	D6	229			-0.105499			DBF20	1	D6	106			-0.991028		LTP1	2	D6	123			-1.0505			DBF20	1	D6	124			-0.570146		LTP1	2	D6	307			-0.729336
	KIN82	1	D7	246			0.363887		SAP185	2	D7	282			0.643789			KIN82	1	D7	212			0.373056		SAP185	2	D7	262			1.20529			KIN82	1	D7	170			0.0579588		SAP185	2	D7	427			0.297457
	FUS3	1	D8	186			-0.422142		YMR1	2	D8	249			0.177251			FUS3	1	D8	251			0.874936		YMR1	2	D8	181			-0.109238			FUS3	1	D8	182			0.221812		YMR1	2	D8	442			0.425806
	TEL1	1	D9	232			0.18048		NEM1	2	D9	264			0.389314			TEL1	1	D9	236			0.681905		NEM1	2	D9	180			-0.125467			TEL1	1	D9	219			0.727027		NEM1	2	D9	486			0.802297
	YGL059W	1	D10	245			0.350786		CNA1	2	D10	259			0.318626			YGL059W	1	D10	178			-0.0644805		CNA1	2	D10	174			-0.222839			YGL059W	1	D10	237			0.972807		CNA1	2	D10	360			-0.275835
	NPR1	1	D11	219			0.0101738		PTP1	2	D11	265			0.403451			NPR1	1	D11	289			1.36395		PTP1	2	D11	154			-0.547413			NPR1	1	D11	192			0.358357		PTP1	2	D11	410			0.151995
	YCK2	1	D12	128			-1.18197		PHO13	2	D12	206			-0.430662			YCK2	1	D12	151			-0.411936		PHO13	2	D12	285			1.57854			YCK2	1	D12	154			-0.160512		PHO13	2	D12	333			-0.506864
	PTK1	1	E1	308			1.17612		REG1	2	E1	298			0.869989			PTK1	1	E1	247			0.823461		REG1	2	E1	168			-0.320211			PTK1	1	E1	182			0.221812		REG1	2	E1	555			1.3927
	VHS1	1	E2	166			-0.684152		PTC6	2	E2	63			-2.45233			VHS1	1	E2	79			-1.33848		PTC6	2	E2	78			-1.78079			VHS1	1	E2	73			-1.26652		PTC6	2	E2	149			-2.08128
	GCN2	1	E3	219			0.0101738		PPH21	2	E3	282			0.643789			GCN2	1	E3	232			0.63043		PPH21	2	E3	188			0.00436255			GCN2	1	E3	160			-0.0785857		PPH21	2	E3	358			-0.292949
	CKA1	1	E4	285			0.874806		PPH22	2	E4	311			1.05378			CKA1	1	E4	174			-0.115955		PPH22	2	E4	256			1.10791			CKA1	1	E4	161			-0.0649313		PPH22	2	E4	425			0.280344
	CMK1	1	E5	261			0.560394		GIP1	2	E5	299			0.884126			CMK1	1	E5	182			-0.0130056		GIP1	2	E5	197			0.150421			CMK1	1	E5	232			0.904535		GIP1	2	E5	434			0.357353
	PKH2	1	E6	313			1.24162		REG2	2	E6	295			0.827576			PKH2	1	E6	197			0.180025		REG2	2	E6	303			1.87066			PKH2	1	E6	313			2.01054		REG2	2	E6	435			0.36591
	SKM1	1	E7	230			0.154279		YBR051W	2	E7	284			0.672064			SKM1	1	E7	0			-2.35511		YBR051W	2	E7	171			-0.271525			SKM1	1	E7	186			0.27643		YBR051W	2	E7	390			-0.0191374
	YGK3	1	E8	232			0.18048		SIW14	2	E8	278			0.587239			YGK3	1	E8	258			0.965017		SIW14	2	E8	202			0.231564			YGK3	1	E8	255			1.21859		SIW14	2	E8	266			-1.08016
	CMK2	1	E9	340			1.59533		PPG1	2	E9	250			0.191388			CMK2	1	E9	245			0.797724		PPG1	2	E9	196			0.134192			CMK2	1	E9	194			0.385666		PPG1	2	E9	317			-0.643769
	CTK3	1	E10	10			-2.72783		TEP1	2	E10	236			-0.0065367			CTK3	1	E10	3			-2.31651		TEP1	2	E10	148			-0.644785			CTK3	1	E10	0			-2.2633		TEP1	2	E10	426			0.2889
	SMK1	1	E11	244			0.337686		SDP1	2	E11	266			0.417589			SMK1	1	E11	276			1.19665		SDP1	2	E11	220			0.52368			SMK1	1	E11	160			-0.0785857		SDP1	2	E11	362			-0.258722
	IME2	1	E12	284			0.861705		RRD1	2	E12	286			0.700339			IME2	1	E12	217			0.4374		RRD1	2	E12	315			2.06541			IME2	1	E12	154			-0.160512		RRD1	2	E12	433			0.348797
	BCK1	1	F1	264			0.599696		OCA1	2	F1	275			0.544826			BCK1	1	F1	205			0.282975		OCA1	2	F1	233			0.734653			BCK1	1	F1	200			0.467592		OCA1	2	F1	316			-0.652326
	BUB1	1	F2	143			-0.985463		SAP190	2	F2	332			1.35066			BUB1	1	F2	109			-0.952422		SAP190	2	F2	232			0.718425			BUB1	1	F2	96			-0.95247		SAP190	2	F2	431			0.331683
	PRR2	1	F3	181			-0.487645		PTC4	2	F3	285			0.686201			PRR2	1	F3	201			0.2315		PTC4	2	F3	179			-0.141696			PRR2	1	F3	130			-0.488219		PTC4	2	F3	386			-0.0533638
	CHK1	1	F4	270			0.678299		PPS1	2	F4	276			0.558964			CHK1	1	F4	198			0.192894		PPS1	2	F4	249			0.994312			CHK1	1	F4	174			0.112577		PPS1	2	F4	400			0.0664287
	CTK2	1	F5	275			0.743801		DCR2	2	F5	268			0.445864			CTK2	1	F5	225			0.540349		DCR2	2	F5	185			-0.0443235			CTK2	1	F5	173			0.0989221		DCR2	2	F5	421			0.246117
	PTK2	1	F6	222			0.0494752		GIP3	2	F6	363			1.78893			PTK2	1	F6	290			1.37682		GIP3	2	F6	252			1.043			PTK2	1	F6	185			0.262776		GIP3	2	F6	479			0.7424
	DUN1	1	F7	181			-0.487645		YSW1	2	F7	258			0.304489			DUN1	1	F7	139			-0.56636		YSW1	2	F7	221			0.539909			DUN1	1	F7	233			0.918189		YSW1	2	F7	379			-0.11326
	STE7	1	F8	209			-0.120831		PTC1	2	F8	30			-2.91886			STE7	1	F8	240			0.73338		PTC1	2	F8	65			-1.99177			STE7	1	F8	221			0.754336		PTC1	2	F8	280			-0.960364
	YBR028C	1	F9	245			0.350786		PHO8	2	F9	290			0.756889			YBR028C	1	F9	284			1.2996		PHO8	2	F9	223			0.572366			YBR028C	1	F9	216			0.686063		PHO8	2	F9	408			0.134882
	AKL1	1	F10	309			1.18922		YER134C	2	F10	195			-0.586175			AKL1	1	F10	233			0.643299		YER134C	2	F10	155			-0.531184			AKL1	1	F10	230			0.877226		YER134C	2	F10	292			-0.857685
	ARK1	1	F11	189			-0.382841		SIT4	2	F11	134			-1.44856			ARK1	1	F11	272			1.14518		SIT4	2	F11	117			-1.14787			ARK1	1	F11	184			0.249121		SIT4	2	F11	223			-1.44809
	SSK2	1	F12	265			0.612796		PTC2	2	F12	269			0.460001			SSK2	1	F12	227			0.566087		PTC2	2	F12	229			0.669739			SSK2	1	F12	209			0.590482		PTC2	2	F12	605			1.82053
	YNR047W	1	G1	222			0.0494752		MSG5	2	G1	299			0.884126			YNR047W	1	G1	168			-0.193168		MSG5	2	G1	179			-0.141696			YNR047W	1	G1	231			0.89088		MSG5	2	G1	376			-0.13893
	KSS1	1	G2	203			-0.199434		TPD3	2	G2	206			-0.430662			KSS1	1	G2	173			-0.128824		TPD3	2	G2	113			-1.21279			KSS1	1	G2	187			0.290084		TPD3	2	G2	227			-1.41386
	DBF2	1	G3	219			0.0101738		ALK1	2	G3	230			-0.0913618			DBF2	1	G3	145			-0.489148		ALK1	2	G3	116			-1.1641			DBF2	1	G3	134			-0.433601		ALK1	2	G3	304			-0.755005
	YAK1	1	G4	281			0.822404		ALK2	2	G4	320			1.18101			YAK1	1	G4	196			0.167156		ALK2	2	G4	285			1.57854			YAK1	1	G4	158			-0.105895		ALK2	2	G4	502			0.939202
	HAL5	1	G5	111			-1.40468		CKB1	2	G5	217			-0.275149			HAL5	1	G5	75			-1.38996		CKB1	2	G5	144			-0.709699			HAL5	1	G5	70			-1.30749		CKB1	2	G5	215			-1.51654
	CTK1	1	G6	8			-2.75403		CKB2	2	G6	221			-0.218599			CTK1	1	G6	10			-2.22643		CKB2	2	G6	135			-0.855758			CTK1	1	G6	7			-2.16772		CKB2	2	G6	373			-0.1646
	SSK22	1	G7	256			0.494892		CLG1	2	G7	237			0.00760081			SSK22	1	G7	182			-0.0130056		CLG1	2	G7	177			-0.174153			SSK22	1	G7	214			0.658755		CLG1	2	G7	297			-0.814902
	RIM11	1	G8	139			-1.03787		FMP48	2	G8	281			0.629651			RIM11	1	G8	100			-1.06824		FMP48	2	G8	236			0.783339			RIM11	1	G8	81			-1.15729		FMP48	2	G8	565			1.47827
	HRK1	1	G9	268			0.652098		GAL83	2	G9	237			0.00760081			HRK1	1	G9	229			0.591824		GAL83	2	G9	179			-0.141696			HRK1	1	G9	145			-0.283402		GAL83	2	G9	366			-0.224496
	PBS2	1	G10	0			-2.85883		IKS1	2	G10	337			1.42135			PBS2	1	G10	1			-2.34224		IKS1	2	G10	264			1.23774			PBS2	1	G10	0			-2.2633		IKS1	2	G10	572			1.53816
	MLP1	1	G11	193			-0.330439		KDX1	2	G11	260			0.332764			MLP1	1	G11	244			0.784855		KDX1	2	G11	255			1.09168			MLP1	1	G11	306			1.91496		KDX1	2	G11	427			0.297457
	YPK2	1	G12	279			0.796203		PKP1	2	G12	219			-0.246874			YPK2	1	G12	265			1.0551		PKP1	2	G12	314			2.04918			YPK2	1	G12	220			0.740681		PKP1	2	G12	482			0.76807
	YDL025C	1	H1	283			0.848605		PRK1	2	H1	65			-2.42405			YDL025C	1	H1	236			0.681905		PRK1	2	H1	26			-2.62468			YDL025C	1	H1	296			1.77842		PRK1	2	H1	13			-3.24498
	MRK1	1	H2	151			-0.880659		RTR1	2	H2	344			1.52031			MRK1	1	H2	247			0.823461		RTR1	2	H2	268			1.30266			MRK1	1	H2	220			0.740681		RTR1	2	H2	579			1.59806
	PKH3	1	H3	218			-0.0029267		SAK1	2	H3	247			0.148976			PKH3	1	H3	215			0.411662		SAK1	2	H3	211			0.377622			PKH3	1	H3	268			1.39609		SAK1	2	H3	454			0.528485
	PKH1	1	H4	221			0.0363748		SIP1	2	H4	272			0.502414			PKH1	1	H4	252			0.887805		SIP1	2	H4	193			0.085506			PKH1	1	H4	194			0.385666		SIP1	2	H4	444			0.442919
	GIN4	1	H5	241			0.298384		SIP2	2	H5	262			0.361039			GIN4	1	H5	271			1.13231		SIP2	2	H5	223			0.572366			GIN4	1	H5	231			0.89088		SIP2	2	H5	602			1.79486
	SPS1	1	H6	205			-0.173233		SNF4	2	H6	211			-0.359974			SPS1	1	H6	220			0.476006		SNF4	2	H6	175			-0.20661			SPS1	1	H6	243			1.05473		SNF4	2	H6	324			-0.583873
	RCK1	1	H7	250			0.416289		YCH1	2	H7	267			0.431726			RCK1	1	H7	268			1.0937		YCH1	2	H7	212			0.393851			RCK1	1	H7	174			0.112577		YCH1	2	H7	432			0.34024
	TOS3	1	H8	204			-0.186333		BLANK	2	H8	0						TOS3	1	H8	228			0.578955		BLANK	2	H8	0						TOS3	1	H8	282			1.58726		BLANK	2	H8	0
	ATG1	1	H9	214			-0.0553286		BLANK	2	H9	0						ATG1	1	H9	297			1.4669		BLANK	2	H9	0						ATG1	1	H9	150			-0.21513		BLANK	2	H9	0
	YCK3	1	H10	21			-2.58372		TOR1	2	H10	283			0.657926			YCK3	1	H10	14			-2.17495		TOR1	2	H10	275			1.41626			YCK3	1	H10	0			-2.2633		TOR1	2	H10	604			1.81198
	BLANK	1	H11	0					SNF1	2	H11	149			-1.2365			BLANK	1	H11	0					SNF1	2	H11	130			-0.936901			BLANK	1	H11	0					SNF1	2	H11	199			-1.65345
	BLANK	1	H12	0					BLANK	2	H12	0						BLANK	1	H12	0					BLANK	2	H12	0						BLANK	1	H12	0					BLANK	2	H12	0

[truncated: 6 more sheets: 1.5M NaCl - 426-Aly1, 1.5M NaCl - 426-Aly2, Col Siz change - Rapa, Rapa - 426-Vector, Rapa - 426-Aly1, Rapa - 426-Aly2]
