# Supplementary material for: TORC1 Signaling Controls the Stability and Function of α-Arrestins Aly1 and Aly2
Source: Biomolecules. 2022 Mar 31;12(4):533. doi: 10.3390/biom12040533 (PMC9031309; doi:10.3390/biom12040533)
Supplement: Supplementary file 1 [file biomolecules-12-00533-s001.zip › Supplemental Table S4.xlsx]

## Sheet: All Candidate Checklist
Supplemental Table 3. Summary of Aly-dependent phenotypes identified in KinDel screen
The gene deletion is listed in the first column. Aly1 over-expression results are in blue and Aly2 over-expression results are in green.
The medium conditions are indicated as either Leu- (SC-Leu- control medium); NaCl (1.5 M salt added to SC-Leu-) and Rapa (50 ng/ml in SC Leu-).
GI = Genetic Interaction listed for Aly1 or Aly2 based on the Saccharomyces Genome Database.
PI = Physical interaction listed for Aly1 or Aly2 based on the Saccharomyces Genome Database.
An X in the table below indicates that Aly-mediated growth on that medium type was altered in the indicated gene deletion based on our measures of colony size.
		pRS426-Aly1					pRS426-Aly2
	Gene	Leu-	NaCl	Rapa	GI for Aly1 (SGD)	PI for Aly1 (SGD)	Leu-	NaCl	Rapa	GI for Aly2 (SGD)	PI for Aly2 (SGD)
	ALK2						X	X		X
	AKL1								X		X
	ALK1							X
	ARK1						X
	ATG1	X									X
	BCK1								X
	BNI4	X		X
	BUB1	X		X					X
	CHK1						X	X
	CKA1			X
	CKA2	X					X
	CKB1			X					X
	CLA4	X	X				X	X			X
	CLG1						X
	CNA1	X	X			X		X			X
	CNB1								X
	CTK1	X	X				X
	CTK3		X				X	X	X
	DBF20	X	X	X				X
	DCR2			X				X
	DUN1	X	X		X			X
	FMP48						X
	FUS3	X	X	X
	GAC1	X	X
	GAL83						X	X
	GCN2						X	X	X
	GIN4		X	X					X
	GIP2	X	X					X
	GIP3		X
	GIP4			X					X
	HAL5	X
	HOG1			X					X
	IKS1			X				X	X
	IRE1		X	X					X
	KIN1								X
	KIN3		X						X
	KIN4							X
	KIN82	X	X
	KNS1		X	X					X
	KSP1	X						X
	LTP1	X	X					X
	MCK1		X				X	X	X		X
	MEK1								X
	MKK2			X
	MLP1						X
	MRK1			X					X
	MSG5	X	X
	NEM1	X	X						X
	NPR1			X	X						X
	OCA1	X							X
	PAM1								X
	PBS2		X	X					X
	PHO8		X
	PIG1		X					X
	PIG2			X
	PKH2							X
	PKP1						X	X	X
	PPH22							X	X
	PPH3	X							X
	PPM1	X	X
	PPQ1			X
	PPS1							X	X
	PRK1	X	X
	PRR1						X
	PRR2	X	X
	PSK1			X
	PSR1							X
	PSR2	X	X
	PSY2								X
	PSY4		X					X
	PTC2			X				X
	PTC3		X					X
	PTC4	X	X					X
	PTC5						X
	PTC6							X
	PTP1							X
	PTP2	X	X					X
	PTP3		X	X					X
	RCK2	X	X
	REG1							X
	RIM11		X					X			X
	RRD1							X
	RRD2						X
	RTS1							X
	SAK1						X
	SAP190	X	X
	SAP4							X
	SDP1		X
	SIP1						X
	SIP2		X				X	X
	SIT4	X	X	X			X	X	X
	SKY1	X	X					X	X		X
	SLT2						X	X
	SMK1	X	X				X	X
	SNF1		X				X	X			X
	SNF4							X
	SPO7		X	X				X	X
	SSN3			X					X	X
	STE11						X
	STE20	X	X				X				X
	STE7		X				X
	TEL1	X	X
	TEP1		X	X				X	X
	TIP41	X		X				X	X
	TOR1			X			X		X
	TOS3		X					X			X
	TPD3						X
	TPK3							X
	VHS1	X	X					X
	YBR028C	X
	YBR051W							X
	YCH1			X			X
	YCK2		X					X			X
	YCK3						X
	YDL025C								X
	YER134C		X					X
	YGK3			X
	YMR1		X
	YMR291W	X
	YPK1			X
	YPK2	X					X
	YPL150W		X
	YPL236C			X
	YSW1						X
	YVH1						X
	ZDS1		X
