# Supplementary material for: TORC1 Signaling Controls the Stability and Function of α-Arrestins Aly1 and Aly2
Source: Biomolecules. 2022 Mar 31;12(4):533. doi: 10.3390/biom12040533 (PMC9031309; doi:10.3390/biom12040533)
Supplement: Supplementary file 1 [file biomolecules-12-00533-s001.zip › Supplemental Table S5.xlsx]

## Sheet: 60 candidates pRS426 growth sco
Supplemental Table 2. Summary of serial dilution growth assays performed on 60 gene deletions candidates identified from initial KinDel screen with Aly1 and Aly2
Deletion	Aly1 to Vec Growth (Ura-)	Aly1 to WT (Ura-)	Aly1 to Vec Growth (NaCl)	Aly1 to WT (NaCl)	Aly1 to Vec Growth (Rapa)	Aly1 to WT (Rapa)	Aly2 to Vec Growth (Ura-)	Aly2 to WT (Ura-)	Aly2 to Vec Growth (NaCl)	Aly2 to WT (NaCl)	Aly2 to vec Growth (Rapa)	Aly2 to WT (Rapa)	Candidate for further study
Alk2	Equal	Equal	Worse	Equal	Better	Equal	Equal	Equal	Equal	Better	Better	Better
Bni4	Equal	Worse	Worse	Worse	Better	Better	Equal	Worse	Worse	Equal	Better	Equal
Bub1	Equal	Worse	Worse	Worse	Equal	Worse	Slightly Worse	Worse	Equal	Worse	Slightly Better?	Worse	Yes
Chk1	Equal	Worse	Equal	Equal	Better	Equal	Equal	Worse	Worse	Worse	Better	Better
Cna1	Much Worse	Worse	Worse	Worse	Better	Worse	Equal	Equal	Equal	Equal	Better	Equal
Ctk1	Equal	Equal	Equal	Worse	Better	Worse	Equal	Equal	Equal	Worse	Better	Worse	Yes
Ctk3	Equal	Worse	Equal	Worse	Equal	Worse	Better	Equal	Better	Equal	Better	Better
Dbf20	Equal	worse	Better	Equal	Better	Worse	Equal	Worse	Equal	Equal	Better	Equal
Dcr2	Equal	Equal	Equal	Equal	Equal	Worse	Equal	Equal	Equal	Worse	Better	Better
Dun1	Better	Equal	Better	Better	Better	Better	Worse	Worse	Equal	Worse	Better	Worse
Fus3	Much Worse	Worse	Worse	Worse	Worse	Worse	Equal	Equal	Equal	Equal	Better	Equal	Yes
Gac1	Much Worse	Worse	Worse	Worse	Better	Worse	Equal	Equal	Worse	Equal	Better	Equal
Gal83	Equal	Equal	Worse	Worse	Equal	Worse	Equal	Equal	Equal	Equal	Better	Better
Gcn2	Equal	Equal	Equal	Equal	Better	better	Worse	Worse	Worse	Worse	Equal	Worse
Gin4	Equal	Equal	Worse	Worse	Better	Worse	Equal	Equal	Better	Better	Better	Equal
Gip2	Worse	Worse	Worse	Worse	Equal	Worse	Worse	Worse	Worse	Worse	Equal	Worse	Yes
Iks1	Equal	Better	Equal	Equal	Worse	Better	Equal	Better	Equal	Equal	Better	Better
Ire1	Equal	Equal	Equal	Equal	Better	Better	Equal	Equal	Equal	Equal	better	Equal
Kin3	Equal	Equal	Equal	Equal	Worse	Better	Better	Better	Equal	Equal	Better	Better
Kin82	Much Worse	Worse	Worse	Worse	Equal	Worse (small dots)	Equal	Equal	Equal	Equal	Equal	Worse	Yes
Kns1	Equal	Equal	Worse	Worse	Worse	Better	Equal	Equal	Worse	Worse	Better	Equal
Ksp1	Worse	Worse	Worse	Worse	Better (small dots)	Better (small dots)	Better	Equal	Equal	Worse	Better	Equal
Ltp1	Equal	Equal	Equal	Better	Better	Better	Equal	Equal	Equal	Better	Better	Better
Mck1	Equal	Worse	Equal	Worse	Equal	Worse	Better	Equal	Better	Equal	Better	Equal
Msg5	Much Worse	Worse	Worse	Worse	Better	Worse	Equal	Equal	Equal	Equal	Better	Equal
Nem1	Worse	Worse	Worse	Worse	Better	Worse	Equal	Equal	Better	Better	Worse	Worse	Yes
Oca1	Equal	Equal	Equal	Better	Better	Equal	Equal	Equal	Worse	Worse	Better	Worse
Pbs2	Equal	Equal	Equal (DEAD)	Worse	Better	Equal	Equal	Equal	Equal (DEAD)	Worse	Better	Equal
Pkp1	Equal	Better	Equal	Worse	Equal	Worse	Better	better	Better	Worse	Better	Better
Pph22	Equal	Equal	Equal	Equal	Better	Better	Worse	Worse	Worse	Worse	Better	Equal
Pph3	Equal	Equal	Equal	Worse	Better	better	Equal	Equal	Equal	Equal	Better	Better
Ppm1	Worse	Worse	Worse	Worse	Equal	Better	Equal	Equal	Equal	Equal	Better	Better
Pps1	Equal	Equal	Equal	Equal	Better	Worse	Equal	Equal	Equal	Worse	Better	Equal
Prk1	Equal	Equal	Better	Worse	Better	Equal	Equal	Equal	Equal	Worse	Better	Equal
Prr2	Worse	Worse	Worse	Worse	Better (small dots)	Better	Better	Equal	Worse	Worse	Better	Equal
Psr2	Equal	Equal	Worse	Worse	Better	Better	Equal	Equal	Equal	Equal	Better	Worse
Ptc2	Equal	Equal	Equal	Equal	Better	Better	Equal	Equal	Equal	Equal	Equal	Worse
Ptc4	Worse	Worse	Worse	Worse	Equal	Worse	Equal	Equal	Worse	Worse	Better	Worse	Yes
Ptp2	Equal	Equal	Equal	Equal	Better	Equal	Worse	Equal	Worse	Worse	Better	Equal
Ptp3	Equal	Equal	Equal	Equal	Better	Equal	Equal	Equal	Equal	Equal	better	Equal
Rck2	Worse	Worse	Worse	Worse	Equal	Worse	Equal	Equal	Equal	Worse	Better	Worse	Yes
Sap190	Worse	Worse	Worse	Worse	Better	Better	Equal	Equal	Worse	Worse	Better	Equal
Sip2	Worse	Equal	Worse	Worse	Equal	Worse	Equal	Better	Equal	Equal	Better	Worse	Yes
Sit4	Better	Better	Better	Better	Worse	Equal	Equal	Equal	Equal	Worse	Better	Equal	Yes
Sky1	Worse	Worse	Worse	Worse	Better	Better	Equal	Equal	Equal	Equal	Better	Better
Slt2	Better	Equal	Equal	Worse	Equal	Worse	Worse	Worse	Worse	Worse	Equal	Worse	Yes
Smk1	Equal	Equal	Worse	Worse	Better	Equal	Equal	Equal	Worse	Worse	Better	Better
Snf1	Equal	Equal	Equal	Equal	Better	Equal	Equal	Equal	Equal	Equal	Better	Worse
Spo7	Better	Equal	Better	Equal	Worse	Worse	Equal	Equal	Worse	Equal	Worse	Worse	Yes
Ste20	Equal	Equal	Better	Equal	Better	Worse	Equal	Better	Better	Worse	Better	Worse	Yes
Ste7	Equal	Equal	Equal	Equal	Equal	Better	Equal	Better	Equal	Equal	Equal	Worse	Yes
Tel1	Much Worse	Worse	Worse	Worse	Equal	Worse	Equal	Equal	Equal	Better	Better	Worse
Tep1	Equal	Equal	Equal	Equal	Better	Equal	Equal	Better	Equal	Equal	Better	Equal
Tip41	Equal	Equal	Equal	Equal	Equal	Better	Equal	Equal	Equal	Equal	Equal	Better	Yes
Tor1	Equal	Equal	Equal	Equal	Better	Worse	Equal	Equal	Equal	Equal	Better	Worse	Yes
Vhs1	Much Worse	Worse	Worse	Worse	Equal	Worse	Equal	Equal	Equal	Equal	Better	Equal
Ych1	Equal	Equal	Equal	Equal	Better	Worse	Equal	Better	Equal	Equal	Better	Worse
Ymr1	Equal	Equal	Worse	Equal	Equal	Worse	Worse	Worse	Worse	Worse	Equal	Worse	Yes
Ysw1	Equal	Equal	Equal	Equal	Better	Worse	Equal	Equal	Equal	Equal	Better	Worse
Yvh1	Equal	Equal	Equal	Equal	Better	Worse	Equal	Equal	Equal	Equal	Better	Worse	Yes
